# Supplementary material for: Uricase-deficient rat is generated with CRISPR/Cas9 technique
Source: PeerJ. 2020 Apr 27;8:e8971. doi: 10.7717/peerj.8971 (PMC7192158; doi:10.7717/peerj.8971)
Supplement: Supplemental Information 1 [file peerj-08-8971-s001.xls]

## Sheet: Fig 1A serum uricase activity
Time (min)	wild-type male	Uox-/-	control	Uox-/- female
0	0		0
3	0.0818233		0
6	0.0217667		0
9	-0.0149833		0
12	-0.0259		0
15	-0.0190667		0
18	-0.02605		0
21	-0.02655		0
24	-0.0194233		0
27	-0.01665		0
30	-0.0187		0
33	-0.0132867		0
36	-0.0175333		0
39	-0.0114867		0
42	-0.0101833		0
45	-0.01383		0
48	-0.01563		0
51	-0.0231		0
54	-0.00865		0
57	-0.0199033		0
60	-0.0171367		0
63	-0.0176033		0
66	-0.01834		0
69	-0.0190133		0
72	-0.0145967		0
75	-0.0558767		0
78	-0.0399		0
81	-0.02232		0
84	-0.00957		0
87	-0.0163633		0
90	-0.0157333		0
93	-0.0179133		0
96	-0.0142233		0
99	-0.0169967		0
102	-0.0158333		0
105	-0.02067		0
108	-0.0359		0
111	-0.0333067		0
114	-0.0337767		0
117	-0.0342833		0
120	-0.0541633		0
123	-0.0541733		0
126	-0.0526533		0
129	-0.0553033		0
132	-0.0551833		0
135	-0.0525067		0
138	-0.0547933		0
141	-0.0586833		0
144	-0.0610533		0
147	-0.07013		0
150	-0.09999		0
153	-0.0824333		0
156	-0.06652		0
159	-0.0566133		0
162	-0.05692		0
165	-0.0605167		0
168	-0.0544		0
171	-0.0620333		0
174	-0.06467		0
177	-0.0689333		0
180	-0.0768267		0
183	-0.0761967		0
186	-0.0815967		0
189	-0.0826		0
192	-0.0806067		0
195	-0.08197		0
198	-0.08795		0
201	-0.0871		0
204	-0.0908833		0
207	-0.0934533		0
210	-0.0925033		0
213	-0.0945667		0
216	-0.09177		0
219	-0.0932633		0
222	-0.0956667		0
225	-0.129767		0
228	-0.118		0
231	-0.102527		0
234	-0.134073		0
237	-0.136143		0
0		0		0
5		0.05273		0.01925
10		0.07682		0.05972
15		0.1224		0.08887
20		0.16917		0.11165
25		0.21312		0.15069
30		0.22702		0.16057
35		0.22695		0.16999
40		0.24518		0.17377
45		0.22087		0.17684
50		0.2459		0.18722
55		0.25115		0.19429
60		0.25363		0.19009
65		0.27145		0.19984
70		0.27028		0.20207
75		0.26327		0.20792
80		0.284		0.21767
85		0.27927		0.21029
90		0.2633		0.2137
95		0.28517		0.22204
100		0.29397		0.23014
105		0.29288		0.22749
110		0.29385		0.22834
115		0.2883		0.22927
120		0.30863		0.2372
125		0.299		0.23377
130		0.3002		0.24072
135		0.29302		0.24049
140		0.30615		0.24395
145		0.30695		0.23554
150		0.30455		0.2449
155		0.29402		0.2456
160		0.32525		0.25345
165		0.3157		0.25312
170		0.31515		0.25192
175		0.30553		0.24999
180		0.30818		0.24954
185		0.31768		0.2524
190		0.31873		0.257
195		0.3203		0.25042
200		0.31425		0.24922
205		0.31805		0.25524
210		0.31768		0.25977
215		0.3151		0.25372
220		0.33355		0.2614
225		0.33415		0.25719
230		0.32587		0.26532
235		0.33035		0.26402
240		0.3408		0.26934

## Sheet: Fig 1B liver uricase activity
Time (min)	wild-type male	Uox-/-	control
0	0		0
3	-0.09275		0
6	-0.12153		0
9	-0.1343		0
12	-0.13988		0
15	-0.14761		0
18	-0.15141		0
21	-0.15815		0
24	-0.15506		0
27	-0.1561		0
30	-0.16163		0
33	-0.16655		0
36	-0.1678		0
39	-0.18288		0
42	-0.18228		0
45	-0.19941		0
48	-0.19133		0
51	-0.2089		0
54	-0.20851		0
57	-0.21313		0
60	-0.21228		0
63	-0.22273		0
66	-0.2263		0
69	-0.22713		0
72	-0.2299		0
75	-0.22728		0
78	-0.24478		0
81	-0.23618		0
84	-0.24371		0
87	-0.24633		0
90	-0.25551		0
93	-0.25916		0
96	-0.2603		0
99	-0.26931		0
102	-0.27028		0
105	-0.27116		0
108	-0.26925		0
111	-0.27078		0
114	-0.27068		0
117	-0.27513		0
120	-0.27091		0
123	-0.25068		0
126	-0.25573		0
129	-0.25793		0
132	-0.25933		0
135	-0.26578		0
138	-0.25306		0
141	-0.25561		0
144	-0.26438		0
147	-0.26148		0
150	-0.25956		0
153	-0.26088		0
156	-0.26103		0
159	-0.26383		0
162	-0.26592		0
165	-0.24941		0
168	-0.25071		0
171	-0.25525		0
174	-0.26296		0
177	-0.25698		0
180	-0.25888		0
183	-0.26855		0
186	-0.25465		0
189	-0.26193		0
192	-0.266		0
195	-0.27046		0
198	-0.27708		0
201	-0.27935		0
204	-0.27798		0
207	-0.27975		0
210	-0.27808		0
213	-0.28225		0
216	-0.259		0
219	-0.26088		0
222	-0.25935		0
225	-0.26213		0
228	-0.26168		0
231	-0.27086		0
234	-0.27305		0
237	-0.27943		0
5		0.01925
10		0.05972
15		0.08887
20		0.11165
25		0.15069
30		0.16057
35		0.16999
40		0.17377
45		0.17684
50		0.18722
55		0.19429
60		0.19009
65		0.19984
70		0.20207
75		0.20792
80		0.21767
85		0.21029
90		0.2137
95		0.22204
100		0.23014
105		0.22749
110		0.22834
115		0.22927
120		0.2372
125		0.23377
130		0.24072
135		0.24049
140		0.24395
145		0.23554
150		0.2449
155		0.2456
160		0.25345
165		0.25312
170		0.25192
175		0.24999
180		0.24954
185		0.2524
190		0.257
195		0.25042
200		0.24922
205		0.25524
210		0.25977
215		0.25372
220		0.2614
225		0.25719
230		0.26532
235		0.26402
240		0.26934
