# Supplementary material for: Uricase-deficient rat is generated with CRISPR/Cas9 technique
Source: PeerJ. 2020 Apr 27;8:e8971. doi: 10.7717/peerj.8971 (PMC7192158; doi:10.7717/peerj.8971)
Supplement: Supplemental Information 6 [file peerj-08-8971-s006.xls]

## Sheet: Sheet2
QueryID	SubjectID	Identity	AlignmentLen	Mismatch	GapOpen	SubjectStart	SubjectEnd	NO.1	No.2	SubjectStart	SubjectEnd	long
A00456:223:HMMCCDSXX:3:1141:25943:5838	gnl|BL_ORD_ID|0	100	150	0	0	36	185	1	1	36	185	150
A00456:223:HMMCCDSXX:3:1519:2519:21919	gnl|BL_ORD_ID|0	100	150	0	0	36	185	2	2	36	185	150
A00456:223:HMMCCDSXX:3:1419:1470:16125	gnl|BL_ORD_ID|0	100	150	0	0	36	185	3	3	36	185	150
A00456:223:HMMCCDSXX:3:1466:3242:23422	gnl|BL_ORD_ID|0	100	150	0	0	36	185	4	4	36	185	150
A00456:223:HMMCCDSXX:3:1528:8883:5102	gnl|BL_ORD_ID|0	100	150	0	0	36	185	5	5	36	185	150
A00456:223:HMMCCDSXX:3:1604:1054:25801	gnl|BL_ORD_ID|0	99.333	150	1	0	36	185	6	6	36	185	150
A00456:223:HMMCCDSXX:3:1635:29116:11303	gnl|BL_ORD_ID|0	100	150	0	0	36	185	7	7	36	185	150
A00456:223:HMMCCDSXX:3:2337:30219:13056	gnl|BL_ORD_ID|0	100	150	0	0	36	185	8	8	36	185	150
A00456:223:HMMCCDSXX:3:2325:27281:30452	gnl|BL_ORD_ID|0	100	34	0	0	37	70	9	1	37	70	34
A00456:223:HMMCCDSXX:3:1103:2718:31031	gnl|BL_ORD_ID|0	100	150	0	0	37	186	10	2	37	186	150
A00456:223:HMMCCDSXX:3:1151:23122:6308	gnl|BL_ORD_ID|0	100	150	0	0	37	186	11	3	37	186	150
A00456:223:HMMCCDSXX:3:1202:25970:20635	gnl|BL_ORD_ID|0	100	150	0	0	37	186	12	4	37	186	150
A00456:223:HMMCCDSXX:3:1413:15564:30452	gnl|BL_ORD_ID|0	100	150	0	0	37	186	13	5	37	186	150
A00456:223:HMMCCDSXX:3:1430:30382:26240	gnl|BL_ORD_ID|0	100	150	0	0	37	186	14	6	37	186	150
A00456:223:HMMCCDSXX:3:1439:18539:26209	gnl|BL_ORD_ID|0	100	150	0	0	37	186	15	7	37	186	150
A00456:223:HMMCCDSXX:3:1445:2220:25848	gnl|BL_ORD_ID|0	100	150	0	0	37	186	16	8	37	186	150
A00456:223:HMMCCDSXX:3:1445:2654:28948	gnl|BL_ORD_ID|0	100	150	0	0	37	186	17	9	37	186	150
A00456:223:HMMCCDSXX:3:1456:32389:11240	gnl|BL_ORD_ID|0	100	150	0	0	37	186	18	10	37	186	150
A00456:223:HMMCCDSXX:3:1465:31919:22795	gnl|BL_ORD_ID|0	100	150	0	0	37	186	19	11	37	186	150
A00456:223:HMMCCDSXX:3:2126:24415:33223	gnl|BL_ORD_ID|0	100	150	0	0	37	186	20	12	37	186	150
A00456:223:HMMCCDSXX:3:2153:22037:7341	gnl|BL_ORD_ID|0	100	150	0	0	37	186	21	13	37	186	150
A00456:223:HMMCCDSXX:3:2212:16206:8359	gnl|BL_ORD_ID|0	100	150	0	0	37	186	22	14	37	186	150
A00456:223:HMMCCDSXX:3:2226:26033:32581	gnl|BL_ORD_ID|0	100	150	0	0	37	186	23	15	37	186	150
A00456:223:HMMCCDSXX:3:2372:15411:17440	gnl|BL_ORD_ID|0	100	150	0	0	37	186	24	16	37	186	150
A00456:223:HMMCCDSXX:3:2504:29315:21825	gnl|BL_ORD_ID|0	100	150	0	0	37	186	25	17	37	186	150
A00456:223:HMMCCDSXX:3:2524:18493:13823	gnl|BL_ORD_ID|0	100	150	0	0	37	186	26	18	37	186	150
A00456:223:HMMCCDSXX:3:2536:31801:19398	gnl|BL_ORD_ID|0	100	150	0	0	37	186	27	19	37	186	150
A00456:223:HMMCCDSXX:3:1308:26964:15655	gnl|BL_ORD_ID|0	100	150	0	0	37	186	28	20	37	186	150
A00456:223:HMMCCDSXX:3:1368:26666:11005	gnl|BL_ORD_ID|0	100	150	0	0	37	186	29	21	37	186	150
A00456:223:HMMCCDSXX:3:1421:12274:11443	gnl|BL_ORD_ID|0	100	150	0	0	37	186	30	22	37	186	150
A00456:223:HMMCCDSXX:3:1424:13277:35477	gnl|BL_ORD_ID|0	100	150	0	0	37	186	31	23	37	186	150
A00456:223:HMMCCDSXX:3:1425:19343:5776	gnl|BL_ORD_ID|0	100	150	0	0	37	186	32	24	37	186	150
A00456:223:HMMCCDSXX:3:1454:32786:6292	gnl|BL_ORD_ID|0	100	150	0	0	37	186	33	25	37	186	150
A00456:223:HMMCCDSXX:3:1457:12680:22138	gnl|BL_ORD_ID|0	100	150	0	0	37	186	34	26	37	186	150
A00456:223:HMMCCDSXX:3:1465:25301:6324	gnl|BL_ORD_ID|0	100	150	0	0	37	186	35	27	37	186	150
A00456:223:HMMCCDSXX:3:1510:6262:35352	gnl|BL_ORD_ID|0	100	150	0	0	37	186	36	28	37	186	150
A00456:223:HMMCCDSXX:3:1536:29794:4116	gnl|BL_ORD_ID|0	100	150	0	0	37	186	37	29	37	186	150
A00456:223:HMMCCDSXX:3:1572:16721:21433	gnl|BL_ORD_ID|0	100	150	0	0	37	186	38	30	37	186	150
A00456:223:HMMCCDSXX:3:1636:32796:14418	gnl|BL_ORD_ID|0	100	150	0	0	37	186	39	31	37	186	150
A00456:223:HMMCCDSXX:3:2125:23972:13009	gnl|BL_ORD_ID|0	100	150	0	0	37	186	40	32	37	186	150
A00456:223:HMMCCDSXX:3:2173:29984:34788	gnl|BL_ORD_ID|0	99.333	150	1	0	37	186	41	33	37	186	150
A00456:223:HMMCCDSXX:3:2228:28465:24486	gnl|BL_ORD_ID|0	100	150	0	0	37	186	42	34	37	186	150
A00456:223:HMMCCDSXX:3:2251:12138:7764	gnl|BL_ORD_ID|0	100	150	0	0	37	186	43	35	37	186	150
A00456:223:HMMCCDSXX:3:2347:5276:7560	gnl|BL_ORD_ID|0	100	150	0	0	37	186	44	36	37	186	150
A00456:223:HMMCCDSXX:3:2426:5493:25786	gnl|BL_ORD_ID|0	100	150	0	0	37	186	45	37	37	186	150
A00456:223:HMMCCDSXX:3:2426:5575:25958	gnl|BL_ORD_ID|0	100	150	0	0	37	186	46	38	37	186	150
A00456:223:HMMCCDSXX:3:2427:2790:22701	gnl|BL_ORD_ID|0	100	150	0	0	37	186	47	39	37	186	150
A00456:223:HMMCCDSXX:3:2432:30816:34444	gnl|BL_ORD_ID|0	100	150	0	0	37	186	48	40	37	186	150
A00456:223:HMMCCDSXX:3:2443:27245:14262	gnl|BL_ORD_ID|0	100	150	0	0	37	186	49	41	37	186	150
A00456:223:HMMCCDSXX:3:2447:7581:8234	gnl|BL_ORD_ID|0	99.333	150	1	0	37	186	50	42	37	186	150
A00456:223:HMMCCDSXX:3:2454:13259:32659	gnl|BL_ORD_ID|0	100	150	0	0	37	186	51	43	37	186	150
A00456:223:HMMCCDSXX:3:2504:19985:15499	gnl|BL_ORD_ID|0	100	150	0	0	37	186	52	44	37	186	150
A00456:223:HMMCCDSXX:3:2602:3414:5995	gnl|BL_ORD_ID|0	100	150	0	0	37	186	53	45	37	186	150
A00456:223:HMMCCDSXX:3:2404:14787:1141	gnl|BL_ORD_ID|0	100	149	0	0	38	186	54	1	38	186	149
A00456:223:HMMCCDSXX:3:1154:16658:25300	gnl|BL_ORD_ID|0	100	150	0	0	38	187	55	2	38	187	150
A00456:223:HMMCCDSXX:3:1154:16577:25254	gnl|BL_ORD_ID|0	100	150	0	0	38	187	56	3	38	187	150
A00456:223:HMMCCDSXX:3:1168:21531:9627	gnl|BL_ORD_ID|0	100	150	0	0	38	187	57	4	38	187	150
A00456:223:HMMCCDSXX:3:1260:11107:22106	gnl|BL_ORD_ID|0	100	150	0	0	38	187	58	5	38	187	150
A00456:223:HMMCCDSXX:3:1260:10655:22514	gnl|BL_ORD_ID|0	100	150	0	0	38	187	59	6	38	187	150
A00456:223:HMMCCDSXX:3:1465:20790:15076	gnl|BL_ORD_ID|0	100	150	0	0	38	187	60	7	38	187	150
A00456:223:HMMCCDSXX:3:2371:24306:23829	gnl|BL_ORD_ID|0	100	150	0	0	38	187	61	8	38	187	150
A00456:223:HMMCCDSXX:3:2563:25192:25645	gnl|BL_ORD_ID|0	100	150	0	0	38	187	62	9	38	187	150
A00456:223:HMMCCDSXX:3:1170:17273:23296	gnl|BL_ORD_ID|0	100	150	0	0	38	187	63	10	38	187	150
A00456:223:HMMCCDSXX:3:1330:3197:2581	gnl|BL_ORD_ID|0	100	150	0	0	38	187	64	11	38	187	150
A00456:223:HMMCCDSXX:3:1337:30463:9314	gnl|BL_ORD_ID|0	100	150	0	0	38	187	65	12	38	187	150
A00456:223:HMMCCDSXX:3:1422:17372:31955	gnl|BL_ORD_ID|0	100	150	0	0	38	187	66	13	38	187	150
A00456:223:HMMCCDSXX:3:1442:28248:35070	gnl|BL_ORD_ID|0	100	150	0	0	38	187	67	14	38	187	150
A00456:223:HMMCCDSXX:3:1453:11098:3803	gnl|BL_ORD_ID|0	100	150	0	0	38	187	68	15	38	187	150
A00456:223:HMMCCDSXX:3:2217:12915:25081	gnl|BL_ORD_ID|0	100	150	0	0	38	187	69	16	38	187	150
A00456:223:HMMCCDSXX:3:2447:16776:16767	gnl|BL_ORD_ID|0	100	150	0	0	38	187	70	17	38	187	150
A00456:223:HMMCCDSXX:3:2652:7355:1861	gnl|BL_ORD_ID|0	100	150	0	0	38	187	71	18	38	187	150
A00456:223:HMMCCDSXX:3:1258:5828:16094	gnl|BL_ORD_ID|0	100	150	0	0	39	188	72	1	39	188	150
A00456:223:HMMCCDSXX:3:1426:31376:6230	gnl|BL_ORD_ID|0	100	150	0	0	39	188	73	2	39	188	150
A00456:223:HMMCCDSXX:3:2137:2962:14450	gnl|BL_ORD_ID|0	99.333	150	1	0	39	188	74	3	39	188	150
A00456:223:HMMCCDSXX:3:2252:23457:7545	gnl|BL_ORD_ID|0	100	150	0	0	39	188	75	4	39	188	150
A00456:223:HMMCCDSXX:3:2345:29722:18082	gnl|BL_ORD_ID|0	100	150	0	0	39	188	76	5	39	188	150
A00456:223:HMMCCDSXX:3:2457:8648:23171	gnl|BL_ORD_ID|0	99.333	150	1	0	39	188	77	6	39	188	150
A00456:223:HMMCCDSXX:3:2461:17246:5212	gnl|BL_ORD_ID|0	98	150	3	0	39	188	78	7	39	188	150
A00456:223:HMMCCDSXX:3:2670:23457:34037	gnl|BL_ORD_ID|0	100	150	0	0	39	188	79	8	39	188	150
A00456:223:HMMCCDSXX:3:1101:13395:7529	gnl|BL_ORD_ID|0	100	150	0	0	39	188	80	9	39	188	150
A00456:223:HMMCCDSXX:3:1178:22164:21872	gnl|BL_ORD_ID|0	100	150	0	0	39	188	81	10	39	188	150
A00456:223:HMMCCDSXX:3:1244:5385:35618	gnl|BL_ORD_ID|0	100	150	0	0	39	188	82	11	39	188	150
A00456:223:HMMCCDSXX:3:1244:4878:35587	gnl|BL_ORD_ID|0	100	150	0	0	39	188	83	12	39	188	150
A00456:223:HMMCCDSXX:3:1276:27552:7780	gnl|BL_ORD_ID|0	100	150	0	0	39	188	84	13	39	188	150
A00456:223:HMMCCDSXX:3:1426:24894:27665	gnl|BL_ORD_ID|0	100	150	0	0	39	188	85	14	39	188	150
A00456:223:HMMCCDSXX:3:1459:21269:16031	gnl|BL_ORD_ID|0	100	150	0	0	39	188	86	15	39	188	150
A00456:223:HMMCCDSXX:3:1651:13946:3286	gnl|BL_ORD_ID|0	100	150	0	0	39	188	87	16	39	188	150
A00456:223:HMMCCDSXX:3:2133:30201:13808	gnl|BL_ORD_ID|0	100	150	0	0	39	188	88	17	39	188	150
A00456:223:HMMCCDSXX:3:2302:28890:6089	gnl|BL_ORD_ID|0	100	150	0	0	39	188	89	18	39	188	150
A00456:223:HMMCCDSXX:3:2349:27688:16438	gnl|BL_ORD_ID|0	100	150	0	0	39	188	90	19	39	188	150
A00456:223:HMMCCDSXX:3:2359:29188:24706	gnl|BL_ORD_ID|0	100	150	0	0	39	188	91	20	39	188	150
A00456:223:HMMCCDSXX:3:2544:27588:15859	gnl|BL_ORD_ID|0	100	150	0	0	39	188	92	21	39	188	150
A00456:223:HMMCCDSXX:3:2604:24397:8202	gnl|BL_ORD_ID|0	100	150	0	0	39	188	93	22	39	188	150
A00456:223:HMMCCDSXX:3:2110:20356:24189	gnl|BL_ORD_ID|0	100	150	0	0	40	189	94	1	40	189	150
A00456:223:HMMCCDSXX:3:2501:16486:25066	gnl|BL_ORD_ID|0	99.333	150	1	0	40	189	95	2	40	189	150
A00456:223:HMMCCDSXX:3:1314:23113:27837	gnl|BL_ORD_ID|0	99.333	150	1	0	40	189	96	3	40	189	150
A00456:223:HMMCCDSXX:3:2617:21649:1658	gnl|BL_ORD_ID|0	100	150	0	0	40	189	97	4	40	189	150
A00456:223:HMMCCDSXX:3:2306:1443:19774	gnl|BL_ORD_ID|0	100	30	0	0	41	70	98	1	41	70	30
A00456:223:HMMCCDSXX:3:2306:1325:19946	gnl|BL_ORD_ID|0	100	30	0	0	41	70	99	2	41	70	30
A00456:223:HMMCCDSXX:3:2512:21386:32487	gnl|BL_ORD_ID|0	100	148	0	0	41	188	100	3	41	188	148
A00456:223:HMMCCDSXX:3:1201:15067:8641	gnl|BL_ORD_ID|0	100	150	0	0	41	190	101	4	41	190	150
A00456:223:HMMCCDSXX:3:1374:28248:7889	gnl|BL_ORD_ID|0	99.333	150	1	0	41	190	102	5	41	190	150
A00456:223:HMMCCDSXX:3:1638:18765:10848	gnl|BL_ORD_ID|0	100	150	0	0	41	190	103	6	41	190	150
A00456:223:HMMCCDSXX:3:1638:18828:11240	gnl|BL_ORD_ID|0	100	150	0	0	41	190	104	7	41	190	150
A00456:223:HMMCCDSXX:3:2229:14181:12430	gnl|BL_ORD_ID|0	98.667	150	2	0	41	190	105	8	41	190	150
A00456:223:HMMCCDSXX:3:2340:13105:5776	gnl|BL_ORD_ID|0	100	150	0	0	41	190	106	9	41	190	150
A00456:223:HMMCCDSXX:3:2613:28357:18223	gnl|BL_ORD_ID|0	100	150	0	0	41	190	107	10	41	190	150
A00456:223:HMMCCDSXX:3:2621:15347:36808	gnl|BL_ORD_ID|0	100	150	0	0	41	190	108	11	41	190	150
A00456:223:HMMCCDSXX:3:1304:19678:25927	gnl|BL_ORD_ID|0	100	150	0	0	41	190	109	12	41	190	150
A00456:223:HMMCCDSXX:3:1331:22932:12085	gnl|BL_ORD_ID|0	100	150	0	0	41	190	110	13	41	190	150
A00456:223:HMMCCDSXX:3:1516:21169:10723	gnl|BL_ORD_ID|0	100	150	0	0	41	190	111	14	41	190	150
A00456:223:HMMCCDSXX:3:1520:5981:33614	gnl|BL_ORD_ID|0	100	150	0	0	41	190	112	15	41	190	150
A00456:223:HMMCCDSXX:3:2121:22516:12054	gnl|BL_ORD_ID|0	100	150	0	0	41	190	113	16	41	190	150
A00456:223:HMMCCDSXX:3:2144:4146:17910	gnl|BL_ORD_ID|0	99.333	150	1	0	41	190	114	17	41	190	150
A00456:223:HMMCCDSXX:3:2646:17716:7498	gnl|BL_ORD_ID|0	99.333	150	1	0	41	190	115	18	41	190	150
A00456:223:HMMCCDSXX:3:1115:19388:7200	gnl|BL_ORD_ID|0	100	150	0	0	42	191	116	1	42	191	150
A00456:223:HMMCCDSXX:3:1115:19515:7294	gnl|BL_ORD_ID|0	100	150	0	0	42	191	117	2	42	191	150
A00456:223:HMMCCDSXX:3:1125:9851:12947	gnl|BL_ORD_ID|0	100	150	0	0	42	191	118	3	42	191	150
A00456:223:HMMCCDSXX:3:1125:9100:13651	gnl|BL_ORD_ID|0	100	150	0	0	42	191	119	4	42	191	150
A00456:223:HMMCCDSXX:3:1435:29930:35227	gnl|BL_ORD_ID|0	100	150	0	0	42	191	120	5	42	191	150
A00456:223:HMMCCDSXX:3:1451:22309:20682	gnl|BL_ORD_ID|0	100	150	0	0	42	191	121	6	42	191	150
A00456:223:HMMCCDSXX:3:1452:19849:4930	gnl|BL_ORD_ID|0	100	150	0	0	42	191	122	7	42	191	150
A00456:223:HMMCCDSXX:3:1469:9471:24126	gnl|BL_ORD_ID|0	100	150	0	0	42	191	123	8	42	191	150
A00456:223:HMMCCDSXX:3:1469:9489:24126	gnl|BL_ORD_ID|0	100	150	0	0	42	191	124	9	42	191	150
A00456:223:HMMCCDSXX:3:2149:17788:29951	gnl|BL_ORD_ID|0	100	150	0	0	42	191	125	10	42	191	150
A00456:223:HMMCCDSXX:3:2456:2302:33379	gnl|BL_ORD_ID|0	100	150	0	0	42	191	126	11	42	191	150
A00456:223:HMMCCDSXX:3:2509:10321:3364	gnl|BL_ORD_ID|0	99.333	150	1	0	42	191	127	12	42	191	150
A00456:223:HMMCCDSXX:3:2524:17327:9862	gnl|BL_ORD_ID|0	100	150	0	0	42	191	128	13	42	191	150
A00456:223:HMMCCDSXX:3:2558:13702:10535	gnl|BL_ORD_ID|0	100	150	0	0	42	191	129	14	42	191	150
A00456:223:HMMCCDSXX:3:2626:26639:28839	gnl|BL_ORD_ID|0	100	150	0	0	42	191	130	15	42	191	150
A00456:223:HMMCCDSXX:3:2646:5113:2738	gnl|BL_ORD_ID|0	100	150	0	0	42	191	131	16	42	191	150
A00456:223:HMMCCDSXX:3:1514:19407:1282	gnl|BL_ORD_ID|0	100	150	0	0	42	191	132	17	42	191	150
A00456:223:HMMCCDSXX:3:1514:19488:1454	gnl|BL_ORD_ID|0	99.333	150	1	0	42	191	133	18	42	191	150
A00456:223:HMMCCDSXX:3:1543:30716:25347	gnl|BL_ORD_ID|0	99.333	150	1	0	42	191	134	19	42	191	150
A00456:223:HMMCCDSXX:3:2227:27606:6965	gnl|BL_ORD_ID|0	100	150	0	0	42	191	135	20	42	191	150
A00456:223:HMMCCDSXX:3:2247:20066:10974	gnl|BL_ORD_ID|0	100	150	0	0	42	191	136	21	42	191	150
A00456:223:HMMCCDSXX:3:2304:8232:13432	gnl|BL_ORD_ID|0	100	150	0	0	42	191	137	22	42	191	150
A00456:223:HMMCCDSXX:3:2505:15799:8437	gnl|BL_ORD_ID|0	100	150	0	0	42	191	138	23	42	191	150
A00456:223:HMMCCDSXX:3:2662:32850:14732	gnl|BL_ORD_ID|0	100	150	0	0	42	191	139	24	42	191	150
A00456:223:HMMCCDSXX:3:1121:16025:29684	gnl|BL_ORD_ID|0	100	150	0	0	43	192	140	1	43	192	150
A00456:223:HMMCCDSXX:3:1126:31846:27618	gnl|BL_ORD_ID|0	100	150	0	0	43	192	141	2	43	192	150
A00456:223:HMMCCDSXX:3:1126:31575:30780	gnl|BL_ORD_ID|0	100	150	0	0	43	192	142	3	43	192	150
A00456:223:HMMCCDSXX:3:1148:17173:7968	gnl|BL_ORD_ID|0	100	150	0	0	43	192	143	4	43	192	150
A00456:223:HMMCCDSXX:3:1148:17942:7827	gnl|BL_ORD_ID|0	100	150	0	0	43	192	144	5	43	192	150
A00456:223:HMMCCDSXX:3:1176:27335:33771	gnl|BL_ORD_ID|0	100	150	0	0	43	192	145	6	43	192	150
A00456:223:HMMCCDSXX:3:1441:15221:24158	gnl|BL_ORD_ID|0	100	150	0	0	43	192	146	7	43	192	150
A00456:223:HMMCCDSXX:3:1469:21287:34256	gnl|BL_ORD_ID|0	100	150	0	0	43	192	147	8	43	192	150
A00456:223:HMMCCDSXX:3:1513:31638:2957	gnl|BL_ORD_ID|0	98	150	3	0	43	192	148	9	43	192	150
A00456:223:HMMCCDSXX:3:1517:17372:21183	gnl|BL_ORD_ID|0	100	150	0	0	43	192	149	10	43	192	150
A00456:223:HMMCCDSXX:3:1517:15130:26287	gnl|BL_ORD_ID|0	100	150	0	0	43	192	150	11	43	192	150
A00456:223:HMMCCDSXX:3:1517:15962:29857	gnl|BL_ORD_ID|0	100	150	0	0	43	192	151	12	43	192	150
A00456:223:HMMCCDSXX:3:1523:21486:12555	gnl|BL_ORD_ID|0	100	150	0	0	43	192	152	13	43	192	150
A00456:223:HMMCCDSXX:3:1556:5737:18693	gnl|BL_ORD_ID|0	100	150	0	0	43	192	153	14	43	192	150
A00456:223:HMMCCDSXX:3:1623:11550:32236	gnl|BL_ORD_ID|0	100	150	0	0	43	192	154	15	43	192	150
A00456:223:HMMCCDSXX:3:1631:26811:29011	gnl|BL_ORD_ID|0	100	150	0	0	43	192	155	16	43	192	150
A00456:223:HMMCCDSXX:3:1643:28736:36605	gnl|BL_ORD_ID|0	100	150	0	0	43	192	156	17	43	192	150
A00456:223:HMMCCDSXX:3:1650:9914:26303	gnl|BL_ORD_ID|0	100	150	0	0	43	192	157	18	43	192	150
A00456:223:HMMCCDSXX:3:1653:3441:22013	gnl|BL_ORD_ID|0	100	150	0	0	43	192	158	19	43	192	150
A00456:223:HMMCCDSXX:3:2105:20609:14857	gnl|BL_ORD_ID|0	100	150	0	0	43	192	159	20	43	192	150
A00456:223:HMMCCDSXX:3:2226:3369:2127	gnl|BL_ORD_ID|0	100	150	0	0	43	192	160	21	43	192	150
A00456:223:HMMCCDSXX:3:2252:3233:16830	gnl|BL_ORD_ID|0	100	150	0	0	43	192	161	22	43	192	150
A00456:223:HMMCCDSXX:3:2310:4906:33567	gnl|BL_ORD_ID|0	100	150	0	0	43	192	162	23	43	192	150
A00456:223:HMMCCDSXX:3:2315:10719:10755	gnl|BL_ORD_ID|0	99.333	150	1	0	43	192	163	24	43	192	150
A00456:223:HMMCCDSXX:3:2361:32036:35336	gnl|BL_ORD_ID|0	100	150	0	0	43	192	164	25	43	192	150
A00456:223:HMMCCDSXX:3:2361:32136:35728	gnl|BL_ORD_ID|0	100	150	0	0	43	192	165	26	43	192	150
A00456:223:HMMCCDSXX:3:2369:14271:32972	gnl|BL_ORD_ID|0	100	150	0	0	43	192	166	27	43	192	150
A00456:223:HMMCCDSXX:3:2449:8721:9706	gnl|BL_ORD_ID|0	100	150	0	0	43	192	167	28	43	192	150
A00456:223:HMMCCDSXX:3:2470:21025:10848	gnl|BL_ORD_ID|0	100	150	0	0	43	192	168	29	43	192	150
A00456:223:HMMCCDSXX:3:2476:21811:21042	gnl|BL_ORD_ID|0	100	150	0	0	43	192	169	30	43	192	150
A00456:223:HMMCCDSXX:3:2513:23800:19820	gnl|BL_ORD_ID|0	100	150	0	0	43	192	170	31	43	192	150
A00456:223:HMMCCDSXX:3:2515:5267:4131	gnl|BL_ORD_ID|0	100	150	0	0	43	192	171	32	43	192	150
A00456:223:HMMCCDSXX:3:2607:12915:29089	gnl|BL_ORD_ID|0	100	150	0	0	43	192	172	33	43	192	150
A00456:223:HMMCCDSXX:3:2668:7970:30138	gnl|BL_ORD_ID|0	100	150	0	0	43	192	173	34	43	192	150
A00456:223:HMMCCDSXX:3:2672:18304:14403	gnl|BL_ORD_ID|0	100	150	0	0	43	192	174	35	43	192	150
A00456:223:HMMCCDSXX:3:2677:17616:2534	gnl|BL_ORD_ID|0	100	150	0	0	43	192	175	36	43	192	150
A00456:223:HMMCCDSXX:3:2678:13042:20948	gnl|BL_ORD_ID|0	100	150	0	0	43	192	176	37	43	192	150
A00456:223:HMMCCDSXX:3:1117:16767:14309	gnl|BL_ORD_ID|0	100	150	0	0	43	192	177	38	43	192	150
A00456:223:HMMCCDSXX:3:1243:13105:11099	gnl|BL_ORD_ID|0	100	150	0	0	43	192	178	39	43	192	150
A00456:223:HMMCCDSXX:3:1247:28772:23265	gnl|BL_ORD_ID|0	100	150	0	0	43	192	179	40	43	192	150
A00456:223:HMMCCDSXX:3:1270:23728:14559	gnl|BL_ORD_ID|0	100	150	0	0	43	192	180	41	43	192	150
A00456:223:HMMCCDSXX:3:1277:7401:14403	gnl|BL_ORD_ID|0	100	150	0	0	43	192	181	42	43	192	150
A00456:223:HMMCCDSXX:3:1329:14733:2613	gnl|BL_ORD_ID|0	100	150	0	0	43	192	182	43	43	192	150
A00456:223:HMMCCDSXX:3:1335:1624:33176	gnl|BL_ORD_ID|0	98.667	150	2	0	43	192	183	44	43	192	150
A00456:223:HMMCCDSXX:3:1342:15835:20369	gnl|BL_ORD_ID|0	100	150	0	0	43	192	184	45	43	192	150
A00456:223:HMMCCDSXX:3:1347:12427:29403	gnl|BL_ORD_ID|0	100	150	0	0	43	192	185	46	43	192	150
A00456:223:HMMCCDSXX:3:1369:20039:14747	gnl|BL_ORD_ID|0	100	150	0	0	43	192	186	47	43	192	150
A00456:223:HMMCCDSXX:3:1375:4237:36479	gnl|BL_ORD_ID|0	100	150	0	0	43	192	187	48	43	192	150
A00456:223:HMMCCDSXX:3:1407:14308:1626	gnl|BL_ORD_ID|0	100	150	0	0	43	192	188	49	43	192	150
A00456:223:HMMCCDSXX:3:1419:8576:23735	gnl|BL_ORD_ID|0	100	150	0	0	43	192	189	50	43	192	150
A00456:223:HMMCCDSXX:3:1449:5394:8140	gnl|BL_ORD_ID|0	100	150	0	0	43	192	190	51	43	192	150
A00456:223:HMMCCDSXX:3:1520:15619:7905	gnl|BL_ORD_ID|0	99.333	150	1	0	43	192	191	52	43	192	150
A00456:223:HMMCCDSXX:3:1531:10239:24643	gnl|BL_ORD_ID|0	100	150	0	0	43	192	192	53	43	192	150
A00456:223:HMMCCDSXX:3:1554:17210:1360	gnl|BL_ORD_ID|0	100	150	0	0	43	192	193	54	43	192	150
A00456:223:HMMCCDSXX:3:1574:23493:21825	gnl|BL_ORD_ID|0	100	150	0	0	43	192	194	55	43	192	150
A00456:223:HMMCCDSXX:3:1627:4580:23610	gnl|BL_ORD_ID|0	100	150	0	0	43	192	195	56	43	192	150
A00456:223:HMMCCDSXX:3:1646:15600:3302	gnl|BL_ORD_ID|0	100	150	0	0	43	192	196	57	43	192	150
A00456:223:HMMCCDSXX:3:1667:7102:32706	gnl|BL_ORD_ID|0	100	150	0	0	43	192	197	58	43	192	150
A00456:223:HMMCCDSXX:3:2212:31512:8281	gnl|BL_ORD_ID|0	100	150	0	0	43	192	198	59	43	192	150
A00456:223:HMMCCDSXX:3:2275:29839:7326	gnl|BL_ORD_ID|0	100	150	0	0	43	192	199	60	43	192	150
A00456:223:HMMCCDSXX:3:2275:29161:7341	gnl|BL_ORD_ID|0	100	150	0	0	43	192	200	61	43	192	150
A00456:223:HMMCCDSXX:3:2405:19226:14685	gnl|BL_ORD_ID|0	100	150	0	0	43	192	201	62	43	192	150
A00456:223:HMMCCDSXX:3:2435:25174:34601	gnl|BL_ORD_ID|0	100	150	0	0	43	192	202	63	43	192	150
A00456:223:HMMCCDSXX:3:2461:31430:9204	gnl|BL_ORD_ID|0	100	150	0	0	43	192	203	64	43	192	150
A00456:223:HMMCCDSXX:3:2542:26910:15687	gnl|BL_ORD_ID|0	100	150	0	0	43	192	204	65	43	192	150
A00456:223:HMMCCDSXX:3:2577:24044:20118	gnl|BL_ORD_ID|0	100	150	0	0	43	192	205	66	43	192	150
A00456:223:HMMCCDSXX:3:1213:16414:36245	gnl|BL_ORD_ID|0	100	150	0	0	44	193	206	1	44	193	150
A00456:223:HMMCCDSXX:3:1262:22824:14810	gnl|BL_ORD_ID|0	100	150	0	0	44	193	207	2	44	193	150
A00456:223:HMMCCDSXX:3:1338:15890:26913	gnl|BL_ORD_ID|0	100	150	0	0	44	193	208	3	44	193	150
A00456:223:HMMCCDSXX:3:1365:13087:22060	gnl|BL_ORD_ID|0	100	150	0	0	44	193	209	4	44	193	150
A00456:223:HMMCCDSXX:3:1435:25057:30702	gnl|BL_ORD_ID|0	100	150	0	0	44	193	210	5	44	193	150
A00456:223:HMMCCDSXX:3:1435:24939:30968	gnl|BL_ORD_ID|0	100	150	0	0	44	193	211	6	44	193	150
A00456:223:HMMCCDSXX:3:1472:4526:21167	gnl|BL_ORD_ID|0	99.333	150	1	0	44	193	212	7	44	193	150
A00456:223:HMMCCDSXX:3:1570:23366:36667	gnl|BL_ORD_ID|0	100	150	0	0	44	193	213	8	44	193	150
A00456:223:HMMCCDSXX:3:2427:4896:16391	gnl|BL_ORD_ID|0	100	150	0	0	44	193	214	9	44	193	150
A00456:223:HMMCCDSXX:3:2534:9353:9236	gnl|BL_ORD_ID|0	99.333	150	1	0	44	193	215	10	44	193	150
A00456:223:HMMCCDSXX:3:2635:18683:24017	gnl|BL_ORD_ID|0	100	150	0	0	44	193	216	11	44	193	150
A00456:223:HMMCCDSXX:3:2671:11062:25629	gnl|BL_ORD_ID|0	100	150	0	0	44	193	217	12	44	193	150
A00456:223:HMMCCDSXX:3:1366:1841:5776	gnl|BL_ORD_ID|0	100	150	0	0	44	193	218	13	44	193	150
A00456:223:HMMCCDSXX:3:1411:14073:13714	gnl|BL_ORD_ID|0	100	150	0	0	44	193	219	14	44	193	150
A00456:223:HMMCCDSXX:3:1448:9362:12602	gnl|BL_ORD_ID|0	100	150	0	0	44	193	220	15	44	193	150
A00456:223:HMMCCDSXX:3:1517:6171:29684	gnl|BL_ORD_ID|0	100	150	0	0	44	193	221	16	44	193	150
A00456:223:HMMCCDSXX:3:1517:6081:30780	gnl|BL_ORD_ID|0	100	150	0	0	44	193	222	17	44	193	150
A00456:223:HMMCCDSXX:3:1522:28565:12446	gnl|BL_ORD_ID|0	100	150	0	0	44	193	223	18	44	193	150
A00456:223:HMMCCDSXX:3:1652:19108:2895	gnl|BL_ORD_ID|0	100	150	0	0	44	193	224	19	44	193	150
A00456:223:HMMCCDSXX:3:1656:19307:25003	gnl|BL_ORD_ID|0	100	150	0	0	44	193	225	20	44	193	150
A00456:223:HMMCCDSXX:3:2110:8757:5603	gnl|BL_ORD_ID|0	100	150	0	0	44	193	226	21	44	193	150
A00456:223:HMMCCDSXX:3:2319:3920:17425	gnl|BL_ORD_ID|0	100	150	0	0	44	193	227	22	44	193	150
A00456:223:HMMCCDSXX:3:2319:3875:18443	gnl|BL_ORD_ID|0	100	150	0	0	44	193	228	23	44	193	150
A00456:223:HMMCCDSXX:3:2429:20202:21699	gnl|BL_ORD_ID|0	100	150	0	0	44	193	229	24	44	193	150
A00456:223:HMMCCDSXX:3:2566:22535:12242	gnl|BL_ORD_ID|0	100	150	0	0	44	193	230	25	44	193	150
A00456:223:HMMCCDSXX:3:2126:17002:10833	gnl|BL_ORD_ID|0	100	150	0	0	45	194	231	1	45	194	150
A00456:223:HMMCCDSXX:3:2273:27950:1360	gnl|BL_ORD_ID|0	100	150	0	0	45	194	232	2	45	194	150
A00456:223:HMMCCDSXX:3:2408:31928:25848	gnl|BL_ORD_ID|0	100	150	0	0	45	194	233	3	45	194	150
A00456:223:HMMCCDSXX:3:2478:4770:27445	gnl|BL_ORD_ID|0	100	150	0	0	45	194	234	4	45	194	150
A00456:223:HMMCCDSXX:3:1320:7762:4664	gnl|BL_ORD_ID|0	100	150	0	0	45	194	235	5	45	194	150
A00456:223:HMMCCDSXX:3:1339:29668:32174	gnl|BL_ORD_ID|0	100	150	0	0	45	194	236	6	45	194	150
A00456:223:HMMCCDSXX:3:2352:27787:19398	gnl|BL_ORD_ID|0	100	150	0	0	45	194	237	7	45	194	150
A00456:223:HMMCCDSXX:3:2571:16550:26365	gnl|BL_ORD_ID|0	100	150	0	0	45	194	238	8	45	194	150
A00456:223:HMMCCDSXX:3:2451:15980:7748	gnl|BL_ORD_ID|0	100	150	0	0	46	195	239	1	46	195	150
A00456:223:HMMCCDSXX:3:2518:28203:18082	gnl|BL_ORD_ID|0	100	150	0	0	46	195	240	2	46	195	150
A00456:223:HMMCCDSXX:3:2669:24008:4492	gnl|BL_ORD_ID|0	100	150	0	0	46	195	241	3	46	195	150
A00456:223:HMMCCDSXX:3:2445:4001:35916	gnl|BL_ORD_ID|0	100	150	0	0	47	196	242	1	47	196	150
A00456:223:HMMCCDSXX:3:2673:2935:36761	gnl|BL_ORD_ID|0	100	150	0	0	47	196	243	2	47	196	150
A00456:223:HMMCCDSXX:3:1425:32615:4805	gnl|BL_ORD_ID|0	100	150	0	0	48	197	244	1	48	197	150
A00456:223:HMMCCDSXX:3:2478:16721:10410	gnl|BL_ORD_ID|0	100	150	0	0	48	197	245	2	48	197	150
A00456:223:HMMCCDSXX:3:1264:10411:26913	gnl|BL_ORD_ID|0	100	150	0	0	48	197	246	3	48	197	150
A00456:223:HMMCCDSXX:3:1633:11171:1423	gnl|BL_ORD_ID|0	100	150	0	0	49	198	247	1	49	198	150
A00456:223:HMMCCDSXX:3:2249:26874:28244	gnl|BL_ORD_ID|0	100	150	0	0	49	198	248	2	49	198	150
A00456:223:HMMCCDSXX:3:1629:23692:5916	gnl|BL_ORD_ID|0	100	150	0	0	49	198	249	3	49	198	150
A00456:223:HMMCCDSXX:3:2345:29722:18082	gnl|BL_ORD_ID|0	100	149	0	0	50	198	250	1	50	198	149
A00456:223:HMMCCDSXX:3:2205:6732:9267	gnl|BL_ORD_ID|0	100	150	0	0	51	200	251	1	51	200	150
A00456:223:HMMCCDSXX:3:1568:4327:33880	gnl|BL_ORD_ID|0	100	150	0	0	52	201	252	1	52	201	150
A00456:223:HMMCCDSXX:3:1139:1434:22952	gnl|BL_ORD_ID|0	100	150	0	0	53	202	253	1	53	202	150
A00456:223:HMMCCDSXX:3:1415:10691:16094	gnl|BL_ORD_ID|0	100	150	0	0	53	202	254	2	53	202	150
A00456:223:HMMCCDSXX:3:2118:10511:15123	gnl|BL_ORD_ID|0	99.333	150	1	0	53	202	255	3	53	202	150
A00456:223:HMMCCDSXX:3:2525:27661:34898	gnl|BL_ORD_ID|0	100	150	0	0	53	202	256	4	53	202	150
A00456:223:HMMCCDSXX:3:2551:8838:14732	gnl|BL_ORD_ID|0	100	150	0	0	53	202	257	5	53	202	150
A00456:223:HMMCCDSXX:3:2474:27914:25911	gnl|BL_ORD_ID|0	100	150	0	0	53	202	258	6	53	202	150
A00456:223:HMMCCDSXX:3:1262:10366:26991	gnl|BL_ORD_ID|0	100	150	0	0	54	203	259	1	54	203	150
A00456:223:HMMCCDSXX:3:1307:12310:1141	gnl|BL_ORD_ID|0	100	150	0	0	54	203	260	2	54	203	150
A00456:223:HMMCCDSXX:3:1340:29423:28401	gnl|BL_ORD_ID|0	100	150	0	0	54	203	261	3	54	203	150
A00456:223:HMMCCDSXX:3:1515:12274:15076	gnl|BL_ORD_ID|0	100	150	0	0	54	203	262	4	54	203	150
A00456:223:HMMCCDSXX:3:1528:24975:16094	gnl|BL_ORD_ID|0	100	150	0	0	54	203	263	5	54	203	150
A00456:223:HMMCCDSXX:3:1545:5195:26365	gnl|BL_ORD_ID|0	100	150	0	0	54	203	264	6	54	203	150
A00456:223:HMMCCDSXX:3:1547:10646:20369	gnl|BL_ORD_ID|0	100	150	0	0	54	203	265	7	54	203	150
A00456:223:HMMCCDSXX:3:2171:13548:21230	gnl|BL_ORD_ID|0	100	150	0	0	54	203	266	8	54	203	150
A00456:223:HMMCCDSXX:3:2261:22914:23422	gnl|BL_ORD_ID|0	100	150	0	0	54	203	267	9	54	203	150
A00456:223:HMMCCDSXX:3:2346:27308:34726	gnl|BL_ORD_ID|0	100	150	0	0	54	203	268	10	54	203	150
A00456:223:HMMCCDSXX:3:2405:16441:2284	gnl|BL_ORD_ID|0	100	150	0	0	54	203	269	11	54	203	150
A00456:223:HMMCCDSXX:3:2438:16731:11584	gnl|BL_ORD_ID|0	100	150	0	0	54	203	270	12	54	203	150
A00456:223:HMMCCDSXX:3:1133:10330:17534	gnl|BL_ORD_ID|0	99.333	150	1	0	54	203	271	13	54	203	150
A00456:223:HMMCCDSXX:3:1176:2230:12211	gnl|BL_ORD_ID|0	100	150	0	0	54	203	272	14	54	203	150
A00456:223:HMMCCDSXX:3:1176:1497:12665	gnl|BL_ORD_ID|0	100	150	0	0	54	203	273	15	54	203	150
A00456:223:HMMCCDSXX:3:1263:16197:13730	gnl|BL_ORD_ID|0	100	150	0	0	54	203	274	16	54	203	150
A00456:223:HMMCCDSXX:3:1325:1099:13636	gnl|BL_ORD_ID|0	99.333	150	1	0	54	203	275	17	54	203	150
A00456:223:HMMCCDSXX:3:1325:1154:13730	gnl|BL_ORD_ID|0	100	150	0	0	54	203	276	18	54	203	150
A00456:223:HMMCCDSXX:3:1415:27046:25003	gnl|BL_ORD_ID|0	100	150	0	0	54	203	277	19	54	203	150
A00456:223:HMMCCDSXX:3:1505:7464:10567	gnl|BL_ORD_ID|0	100	150	0	0	54	203	278	20	54	203	150
A00456:223:HMMCCDSXX:3:1534:4354:7529	gnl|BL_ORD_ID|0	100	150	0	0	54	203	279	21	54	203	150
A00456:223:HMMCCDSXX:3:1663:18150:29700	gnl|BL_ORD_ID|0	100	150	0	0	54	203	280	22	54	203	150
A00456:223:HMMCCDSXX:3:2131:12319:28682	gnl|BL_ORD_ID|0	99.333	150	1	0	54	203	281	23	54	203	150
A00456:223:HMMCCDSXX:3:2144:19551:27680	gnl|BL_ORD_ID|0	100	150	0	0	54	203	282	24	54	203	150
A00456:223:HMMCCDSXX:3:2358:3477:11710	gnl|BL_ORD_ID|0	100	150	0	0	54	203	283	25	54	203	150
A00456:223:HMMCCDSXX:3:2358:3161:11663	gnl|BL_ORD_ID|0	99.333	150	1	0	54	203	284	26	54	203	150
A00456:223:HMMCCDSXX:3:2545:11098:13135	gnl|BL_ORD_ID|0	100	150	0	0	54	203	285	27	54	203	150
A00456:223:HMMCCDSXX:3:2676:13214:8030	gnl|BL_ORD_ID|0	100	150	0	0	54	203	286	28	54	203	150
A00456:223:HMMCCDSXX:3:2427:5556:13307	gnl|BL_ORD_ID|0	93.377	151	10	1	54	204	287	29	54	204	151
A00456:223:HMMCCDSXX:3:1113:30083:7247	gnl|BL_ORD_ID|0	100	150	0	0	55	204	288	1	55	204	150
A00456:223:HMMCCDSXX:3:1139:19135:10019	gnl|BL_ORD_ID|0	100	150	0	0	55	204	289	2	55	204	150
A00456:223:HMMCCDSXX:3:1177:32407:18630	gnl|BL_ORD_ID|0	100	150	0	0	55	204	290	3	55	204	150
A00456:223:HMMCCDSXX:3:1310:19316:1125	gnl|BL_ORD_ID|0	100	150	0	0	55	204	291	4	55	204	150
A00456:223:HMMCCDSXX:3:1325:26368:15154	gnl|BL_ORD_ID|0	100	150	0	0	55	204	292	5	55	204	150
A00456:223:HMMCCDSXX:3:1404:30770:16391	gnl|BL_ORD_ID|0	100	150	0	0	55	204	293	6	55	204	150
A00456:223:HMMCCDSXX:3:1440:22535:33974	gnl|BL_ORD_ID|0	100	150	0	0	55	204	294	7	55	204	150
A00456:223:HMMCCDSXX:3:1539:10565:13119	gnl|BL_ORD_ID|0	100	150	0	0	55	204	295	8	55	204	150
A00456:223:HMMCCDSXX:3:1622:28999:20964	gnl|BL_ORD_ID|0	100	150	0	0	55	204	296	9	55	204	150
A00456:223:HMMCCDSXX:3:1656:26693:26334	gnl|BL_ORD_ID|0	100	150	0	0	55	204	297	10	55	204	150
A00456:223:HMMCCDSXX:3:2445:7572:30827	gnl|BL_ORD_ID|0	100	150	0	0	55	204	298	11	55	204	150
A00456:223:HMMCCDSXX:3:2557:17372:11287	gnl|BL_ORD_ID|0	100	150	0	0	55	204	299	12	55	204	150
A00456:223:HMMCCDSXX:3:1267:2790:28682	gnl|BL_ORD_ID|0	92.667	150	11	0	55	204	300	13	55	204	150
A00456:223:HMMCCDSXX:3:1427:13774:32456	gnl|BL_ORD_ID|0	100	150	0	0	55	204	301	14	55	204	150
A00456:223:HMMCCDSXX:3:1428:21929:21934	gnl|BL_ORD_ID|0	100	150	0	0	55	204	302	15	55	204	150
A00456:223:HMMCCDSXX:3:1457:30734:16767	gnl|BL_ORD_ID|0	100	150	0	0	55	204	303	16	55	204	150
A00456:223:HMMCCDSXX:3:1457:29541:18364	gnl|BL_ORD_ID|0	100	150	0	0	55	204	304	17	55	204	150
A00456:223:HMMCCDSXX:3:1459:13738:17581	gnl|BL_ORD_ID|0	100	150	0	0	55	204	305	18	55	204	150
A00456:223:HMMCCDSXX:3:1541:22055:11068	gnl|BL_ORD_ID|0	100	150	0	0	55	204	306	19	55	204	150
A00456:223:HMMCCDSXX:3:1569:30725:16282	gnl|BL_ORD_ID|0	98.667	150	2	0	55	204	307	20	55	204	150
A00456:223:HMMCCDSXX:3:1635:5457:20087	gnl|BL_ORD_ID|0	100	150	0	0	55	204	308	21	55	204	150
A00456:223:HMMCCDSXX:3:1635:2239:26412	gnl|BL_ORD_ID|0	100	150	0	0	55	204	309	22	55	204	150
A00456:223:HMMCCDSXX:3:2114:7392:28260	gnl|BL_ORD_ID|0	100	150	0	0	55	204	310	23	55	204	150
A00456:223:HMMCCDSXX:3:2138:10655:33035	gnl|BL_ORD_ID|0	100	150	0	0	55	204	311	24	55	204	150
A00456:223:HMMCCDSXX:3:2211:31882:20603	gnl|BL_ORD_ID|0	100	150	0	0	55	204	312	25	55	204	150
A00456:223:HMMCCDSXX:3:2246:2700:22294	gnl|BL_ORD_ID|0	100	150	0	0	55	204	313	26	55	204	150
A00456:223:HMMCCDSXX:3:2278:4490:3067	gnl|BL_ORD_ID|0	100	150	0	0	55	204	314	27	55	204	150
A00456:223:HMMCCDSXX:3:2403:11659:24001	gnl|BL_ORD_ID|0	100	150	0	0	55	204	315	28	55	204	150
A00456:223:HMMCCDSXX:3:2414:16251:26318	gnl|BL_ORD_ID|0	100	150	0	0	55	204	316	29	55	204	150
A00456:223:HMMCCDSXX:3:2417:19759:29857	gnl|BL_ORD_ID|0	100	150	0	0	55	204	317	30	55	204	150
A00456:223:HMMCCDSXX:3:2526:30110:35728	gnl|BL_ORD_ID|0	100	150	0	0	55	204	318	31	55	204	150
A00456:223:HMMCCDSXX:3:2572:13051:19429	gnl|BL_ORD_ID|0	100	150	0	0	55	204	319	32	55	204	150
A00456:223:HMMCCDSXX:3:2572:11433:26553	gnl|BL_ORD_ID|0	100	150	0	0	55	204	320	33	55	204	150
A00456:223:HMMCCDSXX:3:2614:24659:34710	gnl|BL_ORD_ID|0	100	150	0	0	55	204	321	34	55	204	150
A00456:223:HMMCCDSXX:3:1471:30373:15796	gnl|BL_ORD_ID|0	100	150	0	0	56	205	322	1	56	205	150
A00456:223:HMMCCDSXX:3:1628:6795:18803	gnl|BL_ORD_ID|0	100	150	0	0	56	205	323	2	56	205	150
A00456:223:HMMCCDSXX:3:1652:8504:34162	gnl|BL_ORD_ID|0	99.333	150	1	0	56	205	324	3	56	205	150
A00456:223:HMMCCDSXX:3:2243:1307:8641	gnl|BL_ORD_ID|0	100	150	0	0	56	205	325	4	56	205	150
A00456:223:HMMCCDSXX:3:2274:22643:1595	gnl|BL_ORD_ID|0	100	150	0	0	56	205	326	5	56	205	150
A00456:223:HMMCCDSXX:3:2448:10041:8860	gnl|BL_ORD_ID|0	100	150	0	0	56	205	327	6	56	205	150
A00456:223:HMMCCDSXX:3:2531:18439:33646	gnl|BL_ORD_ID|0	100	150	0	0	56	205	328	7	56	205	150
A00456:223:HMMCCDSXX:3:2560:2591:17942	gnl|BL_ORD_ID|0	100	150	0	0	56	205	329	8	56	205	150
A00456:223:HMMCCDSXX:3:2560:2591:18035	gnl|BL_ORD_ID|0	100	150	0	0	56	205	330	9	56	205	150
A00456:223:HMMCCDSXX:3:2577:7229:1830	gnl|BL_ORD_ID|0	100	150	0	0	56	205	331	10	56	205	150
A00456:223:HMMCCDSXX:3:1328:31015:35164	gnl|BL_ORD_ID|0	100	150	0	0	56	205	332	11	56	205	150
A00456:223:HMMCCDSXX:3:1345:10746:35603	gnl|BL_ORD_ID|0	97.333	150	4	0	56	205	333	12	56	205	150
A00456:223:HMMCCDSXX:3:1533:13358:23062	gnl|BL_ORD_ID|0	100	150	0	0	56	205	334	13	56	205	150
A00456:223:HMMCCDSXX:3:1540:3224:12273	gnl|BL_ORD_ID|0	100	150	0	0	56	205	335	14	56	205	150
A00456:223:HMMCCDSXX:3:1546:26729:32471	gnl|BL_ORD_ID|0	100	150	0	0	56	205	336	15	56	205	150
A00456:223:HMMCCDSXX:3:1578:27642:12132	gnl|BL_ORD_ID|0	100	150	0	0	56	205	337	16	56	205	150
A00456:223:HMMCCDSXX:3:1667:32895:20917	gnl|BL_ORD_ID|0	100	150	0	0	56	205	338	17	56	205	150
A00456:223:HMMCCDSXX:3:2105:17734:3270	gnl|BL_ORD_ID|0	100	150	0	0	56	205	339	18	56	205	150
A00456:223:HMMCCDSXX:3:2210:31548:31297	gnl|BL_ORD_ID|0	100	150	0	0	56	205	340	19	56	205	150
A00456:223:HMMCCDSXX:3:2226:5810:27524	gnl|BL_ORD_ID|0	99.333	150	1	0	56	205	341	20	56	205	150
A00456:223:HMMCCDSXX:3:2232:29243:21825	gnl|BL_ORD_ID|0	100	150	0	0	56	205	342	21	56	205	150
A00456:223:HMMCCDSXX:3:2252:25545:12446	gnl|BL_ORD_ID|0	100	150	0	0	56	205	343	22	56	205	150
A00456:223:HMMCCDSXX:3:2252:7789:31955	gnl|BL_ORD_ID|0	100	150	0	0	56	205	344	23	56	205	150
A00456:223:HMMCCDSXX:3:2351:5403:25504	gnl|BL_ORD_ID|0	100	150	0	0	56	205	345	24	56	205	150
A00456:223:HMMCCDSXX:3:2360:22254:30326	gnl|BL_ORD_ID|0	100	150	0	0	56	205	346	25	56	205	150
A00456:223:HMMCCDSXX:3:2404:32777:3239	gnl|BL_ORD_ID|0	99.333	150	1	0	56	205	347	26	56	205	150
A00456:223:HMMCCDSXX:3:2505:17183:17973	gnl|BL_ORD_ID|0	99.333	150	1	0	56	205	348	27	56	205	150
A00456:223:HMMCCDSXX:3:2578:16613:15264	gnl|BL_ORD_ID|0	100	150	0	0	56	205	349	28	56	205	150
A00456:223:HMMCCDSXX:3:1651:13946:3286	gnl|BL_ORD_ID|0	100	150	0	0	57	206	350	1	57	206	150
A00456:223:HMMCCDSXX:3:1203:4869:29403	gnl|BL_ORD_ID|0	100	150	0	0	57	206	351	2	57	206	150
A00456:223:HMMCCDSXX:3:1203:4481:30545	gnl|BL_ORD_ID|0	100	150	0	0	57	206	352	3	57	206	150
A00456:223:HMMCCDSXX:3:1264:10411:26913	gnl|BL_ORD_ID|0	99.329	149	1	0	58	206	353	1	58	206	149
A00456:223:HMMCCDSXX:3:1110:24867:14309	gnl|BL_ORD_ID|0	100	150	0	0	58	207	354	2	58	207	150
A00456:223:HMMCCDSXX:3:1134:29152:19132	gnl|BL_ORD_ID|0	100	150	0	0	58	207	355	3	58	207	150
A00456:223:HMMCCDSXX:3:1141:27814:36980	gnl|BL_ORD_ID|0	100	150	0	0	58	207	356	4	58	207	150
A00456:223:HMMCCDSXX:3:1158:20003:16063	gnl|BL_ORD_ID|0	99.333	150	1	0	58	207	357	5	58	207	150
A00456:223:HMMCCDSXX:3:1309:7563:14465	gnl|BL_ORD_ID|0	100	150	0	0	58	207	358	6	58	207	150
A00456:223:HMMCCDSXX:3:1337:9064:31845	gnl|BL_ORD_ID|0	100	150	0	0	58	207	359	7	58	207	150
A00456:223:HMMCCDSXX:3:1337:9317:32033	gnl|BL_ORD_ID|0	100	150	0	0	58	207	360	8	58	207	150
A00456:223:HMMCCDSXX:3:1369:29469:20838	gnl|BL_ORD_ID|0	100	150	0	0	58	207	361	9	58	207	150
A00456:223:HMMCCDSXX:3:1403:30346:3630	gnl|BL_ORD_ID|0	100	150	0	0	58	207	362	10	58	207	150
A00456:223:HMMCCDSXX:3:1433:29062:16219	gnl|BL_ORD_ID|0	100	150	0	0	58	207	363	11	58	207	150
A00456:223:HMMCCDSXX:3:1517:5276:1110	gnl|BL_ORD_ID|0	100	150	0	0	58	207	364	12	58	207	150
A00456:223:HMMCCDSXX:3:1557:16143:19022	gnl|BL_ORD_ID|0	100	150	0	0	58	207	365	13	58	207	150
A00456:223:HMMCCDSXX:3:1613:17192:26475	gnl|BL_ORD_ID|0	100	150	0	0	58	207	366	14	58	207	150
A00456:223:HMMCCDSXX:3:1666:14371:23531	gnl|BL_ORD_ID|0	100	150	0	0	58	207	367	15	58	207	150
A00456:223:HMMCCDSXX:3:1672:9959:17989	gnl|BL_ORD_ID|0	100	150	0	0	58	207	368	16	58	207	150
A00456:223:HMMCCDSXX:3:2106:18358:6605	gnl|BL_ORD_ID|0	100	150	0	0	58	207	369	17	58	207	150
A00456:223:HMMCCDSXX:3:2125:5502:13557	gnl|BL_ORD_ID|0	100	150	0	0	58	207	370	18	58	207	150
A00456:223:HMMCCDSXX:3:2206:29478:35697	gnl|BL_ORD_ID|0	100	150	0	0	58	207	371	19	58	207	150
A00456:223:HMMCCDSXX:3:2223:24822:12727	gnl|BL_ORD_ID|0	98.667	150	2	0	58	207	372	20	58	207	150
A00456:223:HMMCCDSXX:3:2250:15998:30044	gnl|BL_ORD_ID|0	99.333	150	1	0	58	207	373	21	58	207	150
A00456:223:HMMCCDSXX:3:2310:12726:30452	gnl|BL_ORD_ID|0	100	150	0	0	58	207	374	22	58	207	150
A00456:223:HMMCCDSXX:3:2349:27986:33238	gnl|BL_ORD_ID|0	100	150	0	0	58	207	375	23	58	207	150
A00456:223:HMMCCDSXX:3:2358:7184:5259	gnl|BL_ORD_ID|0	100	150	0	0	58	207	376	24	58	207	150
A00456:223:HMMCCDSXX:3:2371:27272:28620	gnl|BL_ORD_ID|0	100	150	0	0	58	207	377	25	58	207	150
A00456:223:HMMCCDSXX:3:2411:18728:34428	gnl|BL_ORD_ID|0	100	150	0	0	58	207	378	26	58	207	150
A00456:223:HMMCCDSXX:3:2411:18665:34569	gnl|BL_ORD_ID|0	100	150	0	0	58	207	379	27	58	207	150
A00456:223:HMMCCDSXX:3:2428:3468:4304	gnl|BL_ORD_ID|0	100	150	0	0	58	207	380	28	58	207	150
A00456:223:HMMCCDSXX:3:2506:11071:2879	gnl|BL_ORD_ID|0	100	150	0	0	58	207	381	29	58	207	150
A00456:223:HMMCCDSXX:3:2508:30608:32330	gnl|BL_ORD_ID|0	100	150	0	0	58	207	382	30	58	207	150
A00456:223:HMMCCDSXX:3:2511:29695:27023	gnl|BL_ORD_ID|0	100	150	0	0	58	207	383	31	58	207	150
A00456:223:HMMCCDSXX:3:2639:5195:11553	gnl|BL_ORD_ID|0	100	150	0	0	58	207	384	32	58	207	150
A00456:223:HMMCCDSXX:3:2663:12644:19852	gnl|BL_ORD_ID|0	100	150	0	0	58	207	385	33	58	207	150
A00456:223:HMMCCDSXX:3:2668:4734:16705	gnl|BL_ORD_ID|0	100	150	0	0	58	207	386	34	58	207	150
A00456:223:HMMCCDSXX:3:1156:14787:8218	gnl|BL_ORD_ID|0	100	150	0	0	58	207	387	35	58	207	150
A00456:223:HMMCCDSXX:3:1173:18900:17472	gnl|BL_ORD_ID|0	100	150	0	0	58	207	388	36	58	207	150
A00456:223:HMMCCDSXX:3:1230:14488:6449	gnl|BL_ORD_ID|0	100	150	0	0	58	207	389	37	58	207	150
A00456:223:HMMCCDSXX:3:1234:12174:19257	gnl|BL_ORD_ID|0	100	150	0	0	58	207	390	38	58	207	150
A00456:223:HMMCCDSXX:3:1411:8305:15562	gnl|BL_ORD_ID|0	100	150	0	0	58	207	391	39	58	207	150
A00456:223:HMMCCDSXX:3:1440:19090:19680	gnl|BL_ORD_ID|0	100	150	0	0	58	207	392	40	58	207	150
A00456:223:HMMCCDSXX:3:1459:26069:23406	gnl|BL_ORD_ID|0	100	150	0	0	58	207	393	41	58	207	150
A00456:223:HMMCCDSXX:3:1478:17210:7059	gnl|BL_ORD_ID|0	100	150	0	0	58	207	394	42	58	207	150
A00456:223:HMMCCDSXX:3:1526:28194:32784	gnl|BL_ORD_ID|0	98.667	150	2	0	58	207	395	43	58	207	150
A00456:223:HMMCCDSXX:3:1529:4869:23015	gnl|BL_ORD_ID|0	100	150	0	0	58	207	396	44	58	207	150
A00456:223:HMMCCDSXX:3:1538:24198:2190	gnl|BL_ORD_ID|0	100	150	0	0	58	207	397	45	58	207	150
A00456:223:HMMCCDSXX:3:1564:7591:36245	gnl|BL_ORD_ID|0	100	150	0	0	58	207	398	46	58	207	150
A00456:223:HMMCCDSXX:3:1578:10411:21120	gnl|BL_ORD_ID|0	100	150	0	0	58	207	399	47	58	207	150
A00456:223:HMMCCDSXX:3:1654:7862:28667	gnl|BL_ORD_ID|0	100	150	0	0	58	207	400	48	58	207	150
A00456:223:HMMCCDSXX:3:1673:20618:18818	gnl|BL_ORD_ID|0	100	150	0	0	58	207	401	49	58	207	150
A00456:223:HMMCCDSXX:3:2107:31141:34945	gnl|BL_ORD_ID|0	100	150	0	0	58	207	402	50	58	207	150
A00456:223:HMMCCDSXX:3:2117:29595:26068	gnl|BL_ORD_ID|0	100	150	0	0	58	207	403	51	58	207	150
A00456:223:HMMCCDSXX:3:2165:7844:35650	gnl|BL_ORD_ID|0	100	150	0	0	58	207	404	52	58	207	150
A00456:223:HMMCCDSXX:3:2170:6705:15483	gnl|BL_ORD_ID|0	100	150	0	0	58	207	405	53	58	207	150
A00456:223:HMMCCDSXX:3:2241:31358:30405	gnl|BL_ORD_ID|0	100	150	0	0	58	207	406	54	58	207	150
A00456:223:HMMCCDSXX:3:2242:27688:16031	gnl|BL_ORD_ID|0	100	150	0	0	58	207	407	55	58	207	150
A00456:223:HMMCCDSXX:3:2347:16984:9799	gnl|BL_ORD_ID|0	99.333	150	1	0	58	207	408	56	58	207	150
A00456:223:HMMCCDSXX:3:2363:32298:3568	gnl|BL_ORD_ID|0	100	150	0	0	58	207	409	57	58	207	150
A00456:223:HMMCCDSXX:3:2366:20708:28432	gnl|BL_ORD_ID|0	99.333	150	1	0	58	207	410	58	58	207	150
A00456:223:HMMCCDSXX:3:2412:10908:23641	gnl|BL_ORD_ID|0	100	150	0	0	58	207	411	59	58	207	150
A00456:223:HMMCCDSXX:3:2413:13060:24987	gnl|BL_ORD_ID|0	100	150	0	0	58	207	412	60	58	207	150
A00456:223:HMMCCDSXX:3:2452:19434:25848	gnl|BL_ORD_ID|0	100	150	0	0	58	207	413	61	58	207	150
A00456:223:HMMCCDSXX:3:2537:8739:18787	gnl|BL_ORD_ID|0	100	150	0	0	58	207	414	62	58	207	150
A00456:223:HMMCCDSXX:3:2605:27633:32471	gnl|BL_ORD_ID|0	100	150	0	0	58	207	415	63	58	207	150
A00456:223:HMMCCDSXX:3:2659:21151:5588	gnl|BL_ORD_ID|0	100	150	0	0	58	207	416	64	58	207	150
A00456:223:HMMCCDSXX:3:2578:16613:15264	gnl|BL_ORD_ID|0	100	150	0	0	59	208	417	1	59	208	150
A00456:223:HMMCCDSXX:3:2515:5267:4131	gnl|BL_ORD_ID|0	99.333	150	1	0	59	208	418	2	59	208	150
A00456:223:HMMCCDSXX:3:2229:14181:12430	gnl|BL_ORD_ID|0	100	149	0	0	59	207	419	3	59	207	149
A00456:223:HMMCCDSXX:3:1568:21974:20635	gnl|BL_ORD_ID|0	100	150	0	0	59	208	420	4	59	208	150
A00456:223:HMMCCDSXX:3:2240:17842:10473	gnl|BL_ORD_ID|0	98	150	3	0	59	208	421	5	59	208	150
A00456:223:HMMCCDSXX:3:1307:23972:27727	gnl|BL_ORD_ID|0	100	150	0	0	59	208	422	6	59	208	150
A00456:223:HMMCCDSXX:3:1344:21811:21073	gnl|BL_ORD_ID|0	100	150	0	0	59	208	423	7	59	208	150
A00456:223:HMMCCDSXX:3:2537:9326:33520	gnl|BL_ORD_ID|0	100	150	0	0	59	208	424	8	59	208	150
A00456:223:HMMCCDSXX:3:1445:22218:33865	gnl|BL_ORD_ID|0	100	150	0	0	60	209	425	1	60	209	150
A00456:223:HMMCCDSXX:3:2512:28230:18317	gnl|BL_ORD_ID|0	100	150	0	0	60	209	426	2	60	209	150
A00456:223:HMMCCDSXX:3:2512:29125:18615	gnl|BL_ORD_ID|0	100	150	0	0	60	209	427	3	60	209	150
A00456:223:HMMCCDSXX:3:1413:25988:3724	gnl|BL_ORD_ID|0	100	150	0	0	61	210	428	1	61	210	150
A00456:223:HMMCCDSXX:3:1375:4237:36479	gnl|BL_ORD_ID|0	100	150	0	0	62	211	429	1	62	211	150
A00456:223:HMMCCDSXX:3:2210:30626:13322	gnl|BL_ORD_ID|0	100	150	0	0	62	211	430	2	62	211	150
A00456:223:HMMCCDSXX:3:2210:30951:15013	gnl|BL_ORD_ID|0	100	150	0	0	62	211	431	3	62	211	150
A00456:223:HMMCCDSXX:3:1440:20347:7012	gnl|BL_ORD_ID|0	97.143	35	1	1	63	96	432	1	63	96	34
A00456:223:HMMCCDSXX:3:1554:17155:34397	gnl|BL_ORD_ID|0	99.275	138	1	1	63	199	433	2	63	199	137
A00456:223:HMMCCDSXX:3:2255:31566:4773	gnl|BL_ORD_ID|0	99.286	140	1	1	63	201	434	3	63	201	139
A00456:223:HMMCCDSXX:3:2356:8323:8359	gnl|BL_ORD_ID|0	99.31	145	1	1	63	206	435	4	63	206	144
A00456:223:HMMCCDSXX:3:1245:2437:29356	gnl|BL_ORD_ID|0	99.32	147	1	1	63	208	436	5	63	208	146
A00456:223:HMMCCDSXX:3:1532:20292:22075	gnl|BL_ORD_ID|0	100	150	0	0	63	212	437	6	63	212	150
A00456:223:HMMCCDSXX:3:1104:26576:9314	gnl|BL_ORD_ID|0	100	150	0	0	64	213	438	1	64	213	150
A00456:223:HMMCCDSXX:3:1245:8169:23657	gnl|BL_ORD_ID|0	99.333	150	1	0	64	213	439	2	64	213	150
A00456:223:HMMCCDSXX:3:1245:8160:23641	gnl|BL_ORD_ID|0	99.333	150	1	0	64	213	440	3	64	213	150
A00456:223:HMMCCDSXX:3:1504:30246:30295	gnl|BL_ORD_ID|0	100	150	0	0	64	213	441	4	64	213	150
A00456:223:HMMCCDSXX:3:1531:24288:9893	gnl|BL_ORD_ID|0	100	150	0	0	64	213	442	5	64	213	150
A00456:223:HMMCCDSXX:3:1612:21775:1219	gnl|BL_ORD_ID|0	100	150	0	0	64	213	443	6	64	213	150
A00456:223:HMMCCDSXX:3:2440:24270:24518	gnl|BL_ORD_ID|0	100	150	0	0	64	213	444	7	64	213	150
A00456:223:HMMCCDSXX:3:2505:24551:35149	gnl|BL_ORD_ID|0	100	150	0	0	64	213	445	8	64	213	150
A00456:223:HMMCCDSXX:3:1435:17083:23030	gnl|BL_ORD_ID|0	100	150	0	0	64	213	446	9	64	213	150
A00456:223:HMMCCDSXX:3:2218:30743:32095	gnl|BL_ORD_ID|0	100	150	0	0	64	213	447	10	64	213	150
A00456:223:HMMCCDSXX:3:2236:1750:8719	gnl|BL_ORD_ID|0	100	150	0	0	64	213	448	11	64	213	150
A00456:223:HMMCCDSXX:3:1123:26738:9972	gnl|BL_ORD_ID|0	100	150	0	0	65	214	449	1	65	214	150
A00456:223:HMMCCDSXX:3:1248:26232:16266	gnl|BL_ORD_ID|0	100	150	0	0	65	214	450	2	65	214	150
A00456:223:HMMCCDSXX:3:1258:11134:17675	gnl|BL_ORD_ID|0	100	150	0	0	65	214	451	3	65	214	150
A00456:223:HMMCCDSXX:3:1274:25147:8406	gnl|BL_ORD_ID|0	100	150	0	0	65	214	452	4	65	214	150
A00456:223:HMMCCDSXX:3:1302:7392:2174	gnl|BL_ORD_ID|0	100	150	0	0	65	214	453	5	65	214	150
A00456:223:HMMCCDSXX:3:1335:23457:28181	gnl|BL_ORD_ID|0	100	150	0	0	65	214	454	6	65	214	150
A00456:223:HMMCCDSXX:3:1429:17210:34522	gnl|BL_ORD_ID|0	99.333	150	1	0	65	214	455	7	65	214	150
A00456:223:HMMCCDSXX:3:1438:29830:23312	gnl|BL_ORD_ID|0	100	150	0	0	65	214	456	8	65	214	150
A00456:223:HMMCCDSXX:3:1454:15790:35697	gnl|BL_ORD_ID|0	100	150	0	0	65	214	457	9	65	214	150
A00456:223:HMMCCDSXX:3:1478:17698:27038	gnl|BL_ORD_ID|0	99.333	150	1	0	65	214	458	10	65	214	150
A00456:223:HMMCCDSXX:3:1545:26982:20791	gnl|BL_ORD_ID|0	100	150	0	0	65	214	459	11	65	214	150
A00456:223:HMMCCDSXX:3:1612:14290:29434	gnl|BL_ORD_ID|0	100	150	0	0	65	214	460	12	65	214	150
A00456:223:HMMCCDSXX:3:2103:6352:2942	gnl|BL_ORD_ID|0	100	150	0	0	65	214	461	13	65	214	150
A00456:223:HMMCCDSXX:3:2207:15465:14340	gnl|BL_ORD_ID|0	100	150	0	0	65	214	462	14	65	214	150
A00456:223:HMMCCDSXX:3:2267:29225:24142	gnl|BL_ORD_ID|0	100	150	0	0	65	214	463	15	65	214	150
A00456:223:HMMCCDSXX:3:2446:12626:27837	gnl|BL_ORD_ID|0	100	150	0	0	65	214	464	16	65	214	150
A00456:223:HMMCCDSXX:3:2606:23945:5040	gnl|BL_ORD_ID|0	100	150	0	0	65	214	465	17	65	214	150
A00456:223:HMMCCDSXX:3:2661:23963:20854	gnl|BL_ORD_ID|0	100	150	0	0	65	214	466	18	65	214	150
A00456:223:HMMCCDSXX:3:1105:25843:32252	gnl|BL_ORD_ID|0	100	150	0	0	65	214	467	19	65	214	150
A00456:223:HMMCCDSXX:3:1154:26765:2754	gnl|BL_ORD_ID|0	99.333	150	1	0	65	214	468	20	65	214	150
A00456:223:HMMCCDSXX:3:1171:17454:6543	gnl|BL_ORD_ID|0	100	150	0	0	65	214	469	21	65	214	150
A00456:223:HMMCCDSXX:3:1249:23891:24455	gnl|BL_ORD_ID|0	100	150	0	0	65	214	470	22	65	214	150
A00456:223:HMMCCDSXX:3:1250:13630:20337	gnl|BL_ORD_ID|0	100	150	0	0	65	214	471	23	65	214	150
A00456:223:HMMCCDSXX:3:1520:9372:35759	gnl|BL_ORD_ID|0	99.333	150	1	0	65	214	472	24	65	214	150
A00456:223:HMMCCDSXX:3:1525:25165:31266	gnl|BL_ORD_ID|0	100	150	0	0	65	214	473	25	65	214	150
A00456:223:HMMCCDSXX:3:2105:28935:27993	gnl|BL_ORD_ID|0	100	150	0	0	65	214	474	26	65	214	150
A00456:223:HMMCCDSXX:3:2107:31358:8108	gnl|BL_ORD_ID|0	100	150	0	0	65	214	475	27	65	214	150
A00456:223:HMMCCDSXX:3:2147:31204:10942	gnl|BL_ORD_ID|0	100	150	0	0	65	214	476	28	65	214	150
A00456:223:HMMCCDSXX:3:2250:26124:30545	gnl|BL_ORD_ID|0	99.333	150	1	0	65	214	477	29	65	214	150
A00456:223:HMMCCDSXX:3:1426:31376:6230	gnl|BL_ORD_ID|0	100	149	0	0	66	214	478	1	66	214	149
A00456:223:HMMCCDSXX:3:1167:23827:3020	gnl|BL_ORD_ID|0	100	150	0	0	66	215	479	2	66	215	150
A00456:223:HMMCCDSXX:3:1169:18801:31266	gnl|BL_ORD_ID|0	100	150	0	0	66	215	480	3	66	215	150
A00456:223:HMMCCDSXX:3:1174:10755:33614	gnl|BL_ORD_ID|0	100	150	0	0	66	215	481	4	66	215	150
A00456:223:HMMCCDSXX:3:1230:10899:10160	gnl|BL_ORD_ID|0	100	150	0	0	66	215	482	5	66	215	150
A00456:223:HMMCCDSXX:3:1230:10836:10739	gnl|BL_ORD_ID|0	100	150	0	0	66	215	483	6	66	215	150
A00456:223:HMMCCDSXX:3:1234:8748:3082	gnl|BL_ORD_ID|0	100	150	0	0	66	215	484	7	66	215	150
A00456:223:HMMCCDSXX:3:1240:30644:32330	gnl|BL_ORD_ID|0	100	150	0	0	66	215	485	8	66	215	150
A00456:223:HMMCCDSXX:3:1241:25301:26083	gnl|BL_ORD_ID|0	100	150	0	0	66	215	486	9	66	215	150
A00456:223:HMMCCDSXX:3:1245:13431:8281	gnl|BL_ORD_ID|0	100	150	0	0	66	215	487	10	66	215	150
A00456:223:HMMCCDSXX:3:1254:18566:4429	gnl|BL_ORD_ID|0	100	150	0	0	66	215	488	11	66	215	150
A00456:223:HMMCCDSXX:3:1254:18575:4726	gnl|BL_ORD_ID|0	100	150	0	0	66	215	489	12	66	215	150
A00456:223:HMMCCDSXX:3:1254:18792:5415	gnl|BL_ORD_ID|0	100	150	0	0	66	215	490	13	66	215	150
A00456:223:HMMCCDSXX:3:1258:28646:12367	gnl|BL_ORD_ID|0	100	150	0	0	66	215	491	14	66	215	150
A00456:223:HMMCCDSXX:3:1335:23204:5509	gnl|BL_ORD_ID|0	100	150	0	0	66	215	492	15	66	215	150
A00456:223:HMMCCDSXX:3:1456:3821:20259	gnl|BL_ORD_ID|0	100	150	0	0	66	215	493	16	66	215	150
A00456:223:HMMCCDSXX:3:1476:25952:7169	gnl|BL_ORD_ID|0	100	150	0	0	66	215	494	17	66	215	150
A00456:223:HMMCCDSXX:3:1574:4472:26428	gnl|BL_ORD_ID|0	100	150	0	0	66	215	495	18	66	215	150
A00456:223:HMMCCDSXX:3:1601:31105:20165	gnl|BL_ORD_ID|0	100	150	0	0	66	215	496	19	66	215	150
A00456:223:HMMCCDSXX:3:1613:14299:25661	gnl|BL_ORD_ID|0	100	150	0	0	66	215	497	20	66	215	150
A00456:223:HMMCCDSXX:3:2107:18873:24158	gnl|BL_ORD_ID|0	100	150	0	0	66	215	498	21	66	215	150
A00456:223:HMMCCDSXX:3:2124:9950:24267	gnl|BL_ORD_ID|0	100	150	0	0	66	215	499	22	66	215	150
A00456:223:HMMCCDSXX:3:2130:28022:17519	gnl|BL_ORD_ID|0	100	150	0	0	66	215	500	23	66	215	150
A00456:223:HMMCCDSXX:3:2148:30490:25269	gnl|BL_ORD_ID|0	100	150	0	0	66	215	501	24	66	215	150
A00456:223:HMMCCDSXX:3:2207:15311:26412	gnl|BL_ORD_ID|0	100	150	0	0	66	215	502	25	66	215	150
A00456:223:HMMCCDSXX:3:2228:2320:10050	gnl|BL_ORD_ID|0	100	150	0	0	66	215	503	26	66	215	150
A00456:223:HMMCCDSXX:3:2228:2456:10535	gnl|BL_ORD_ID|0	100	150	0	0	66	215	504	27	66	215	150
A00456:223:HMMCCDSXX:3:2244:22670:15546	gnl|BL_ORD_ID|0	100	150	0	0	66	215	505	28	66	215	150
A00456:223:HMMCCDSXX:3:2254:13919:20431	gnl|BL_ORD_ID|0	100	150	0	0	66	215	506	29	66	215	150
A00456:223:HMMCCDSXX:3:2254:14344:21512	gnl|BL_ORD_ID|0	100	150	0	0	66	215	507	30	66	215	150
A00456:223:HMMCCDSXX:3:2260:17390:16266	gnl|BL_ORD_ID|0	100	150	0	0	66	215	508	31	66	215	150
A00456:223:HMMCCDSXX:3:2309:13205:13150	gnl|BL_ORD_ID|0	100	150	0	0	66	215	509	32	66	215	150
A00456:223:HMMCCDSXX:3:2313:18701:4319	gnl|BL_ORD_ID|0	100	150	0	0	66	215	510	33	66	215	150
A00456:223:HMMCCDSXX:3:2412:17942:9142	gnl|BL_ORD_ID|0	100	150	0	0	66	215	511	34	66	215	150
A00456:223:HMMCCDSXX:3:2419:1488:4726	gnl|BL_ORD_ID|0	100	150	0	0	66	215	512	35	66	215	150
A00456:223:HMMCCDSXX:3:2426:15483:18693	gnl|BL_ORD_ID|0	100	150	0	0	66	215	513	36	66	215	150
A00456:223:HMMCCDSXX:3:2449:4652:32941	gnl|BL_ORD_ID|0	100	150	0	0	66	215	514	37	66	215	150
A00456:223:HMMCCDSXX:3:2458:27534:8469	gnl|BL_ORD_ID|0	100	150	0	0	66	215	515	38	66	215	150
A00456:223:HMMCCDSXX:3:2501:2428:13683	gnl|BL_ORD_ID|0	100	150	0	0	66	215	516	39	66	215	150
A00456:223:HMMCCDSXX:3:2527:18475:29888	gnl|BL_ORD_ID|0	100	150	0	0	66	215	517	40	66	215	150
A00456:223:HMMCCDSXX:3:2527:17978:30185	gnl|BL_ORD_ID|0	100	150	0	0	66	215	518	41	66	215	150
A00456:223:HMMCCDSXX:3:2529:9787:35258	gnl|BL_ORD_ID|0	100	150	0	0	66	215	519	42	66	215	150
A00456:223:HMMCCDSXX:3:2561:3369:4257	gnl|BL_ORD_ID|0	100	150	0	0	66	215	520	43	66	215	150
A00456:223:HMMCCDSXX:3:2568:30228:32299	gnl|BL_ORD_ID|0	100	150	0	0	66	215	521	44	66	215	150
A00456:223:HMMCCDSXX:3:2647:22598:18803	gnl|BL_ORD_ID|0	100	150	0	0	66	215	522	45	66	215	150
A00456:223:HMMCCDSXX:3:2676:28122:15718	gnl|BL_ORD_ID|0	99.333	150	1	0	66	215	523	46	66	215	150
A00456:223:HMMCCDSXX:3:1109:21531:36057	gnl|BL_ORD_ID|0	99.333	150	1	0	66	215	524	47	66	215	150
A00456:223:HMMCCDSXX:3:1124:23421:8703	gnl|BL_ORD_ID|0	100	150	0	0	66	215	525	48	66	215	150
A00456:223:HMMCCDSXX:3:1162:3179:15013	gnl|BL_ORD_ID|0	100	150	0	0	66	215	526	49	66	215	150
A00456:223:HMMCCDSXX:3:1230:5764:6370	gnl|BL_ORD_ID|0	100	150	0	0	66	215	527	50	66	215	150
A00456:223:HMMCCDSXX:3:1339:15393:24893	gnl|BL_ORD_ID|0	100	150	0	0	66	215	528	51	66	215	150
A00456:223:HMMCCDSXX:3:1402:28583:35211	gnl|BL_ORD_ID|0	100	150	0	0	66	215	529	52	66	215	150
A00456:223:HMMCCDSXX:3:1417:8865:26960	gnl|BL_ORD_ID|0	100	150	0	0	66	215	530	53	66	215	150
A00456:223:HMMCCDSXX:3:1422:21368:2018	gnl|BL_ORD_ID|0	100	150	0	0	66	215	531	54	66	215	150
A00456:223:HMMCCDSXX:3:1422:12246:15342	gnl|BL_ORD_ID|0	100	150	0	0	66	215	532	55	66	215	150
A00456:223:HMMCCDSXX:3:1425:27091:12273	gnl|BL_ORD_ID|0	100	150	0	0	66	215	533	56	66	215	150
A00456:223:HMMCCDSXX:3:1432:30472:5040	gnl|BL_ORD_ID|0	100	150	0	0	66	215	534	57	66	215	150
A00456:223:HMMCCDSXX:3:1501:32344:11005	gnl|BL_ORD_ID|0	100	150	0	0	66	215	535	58	66	215	150
A00456:223:HMMCCDSXX:3:1575:13160:8938	gnl|BL_ORD_ID|0	100	150	0	0	66	215	536	59	66	215	150
A00456:223:HMMCCDSXX:3:1601:12744:35806	gnl|BL_ORD_ID|0	100	150	0	0	66	215	537	60	66	215	150
A00456:223:HMMCCDSXX:3:1603:26847:6903	gnl|BL_ORD_ID|0	100	150	0	0	66	215	538	61	66	215	150
A00456:223:HMMCCDSXX:3:1603:27688:8171	gnl|BL_ORD_ID|0	100	150	0	0	66	215	539	62	66	215	150
A00456:223:HMMCCDSXX:3:1622:4255:32002	gnl|BL_ORD_ID|0	100	150	0	0	66	215	540	63	66	215	150
A00456:223:HMMCCDSXX:3:1629:1976:14403	gnl|BL_ORD_ID|0	100	150	0	0	66	215	541	64	66	215	150
A00456:223:HMMCCDSXX:3:1634:15854:8750	gnl|BL_ORD_ID|0	100	150	0	0	66	215	542	65	66	215	150
A00456:223:HMMCCDSXX:3:1634:14208:9377	gnl|BL_ORD_ID|0	100	150	0	0	66	215	543	66	66	215	150
A00456:223:HMMCCDSXX:3:1657:9118:32189	gnl|BL_ORD_ID|0	100	150	0	0	66	215	544	67	66	215	150
A00456:223:HMMCCDSXX:3:2124:1651:3067	gnl|BL_ORD_ID|0	100	150	0	0	66	215	545	68	66	215	150
A00456:223:HMMCCDSXX:3:2138:22978:32330	gnl|BL_ORD_ID|0	100	150	0	0	66	215	546	69	66	215	150
A00456:223:HMMCCDSXX:3:2141:14353:3615	gnl|BL_ORD_ID|0	100	150	0	0	66	215	547	70	66	215	150
A00456:223:HMMCCDSXX:3:2206:29595:19053	gnl|BL_ORD_ID|0	99.333	150	1	0	66	215	548	71	66	215	150
A00456:223:HMMCCDSXX:3:2225:12084:34225	gnl|BL_ORD_ID|0	100	150	0	0	66	215	549	72	66	215	150
A00456:223:HMMCCDSXX:3:2237:14253:36730	gnl|BL_ORD_ID|0	100	150	0	0	66	215	550	73	66	215	150
A00456:223:HMMCCDSXX:3:2265:13548:24674	gnl|BL_ORD_ID|0	100	150	0	0	66	215	551	74	66	215	150
A00456:223:HMMCCDSXX:3:2333:14389:32925	gnl|BL_ORD_ID|0	100	150	0	0	66	215	552	75	66	215	150
A00456:223:HMMCCDSXX:3:2376:13865:2080	gnl|BL_ORD_ID|0	100	150	0	0	66	215	553	76	66	215	150
A00456:223:HMMCCDSXX:3:2447:7355:36119	gnl|BL_ORD_ID|0	100	150	0	0	66	215	554	77	66	215	150
A00456:223:HMMCCDSXX:3:2517:26567:14027	gnl|BL_ORD_ID|0	99.333	150	1	0	66	215	555	78	66	215	150
A00456:223:HMMCCDSXX:3:2543:28673:21277	gnl|BL_ORD_ID|0	99.333	150	1	0	66	215	556	79	66	215	150
A00456:223:HMMCCDSXX:3:2548:11885:7169	gnl|BL_ORD_ID|0	100	150	0	0	66	215	557	80	66	215	150
A00456:223:HMMCCDSXX:3:2564:21423:33771	gnl|BL_ORD_ID|0	100	150	0	0	66	215	558	81	66	215	150
A00456:223:HMMCCDSXX:3:2678:31367:21621	gnl|BL_ORD_ID|0	100	150	0	0	66	215	559	82	66	215	150
A00456:223:HMMCCDSXX:3:1302:28971:24017	gnl|BL_ORD_ID|0	100	148	0	0	67	214	560	1	67	214	148
A00456:223:HMMCCDSXX:3:1312:9435:30076	gnl|BL_ORD_ID|0	100	150	0	0	67	216	561	2	67	216	150
A00456:223:HMMCCDSXX:3:1351:6470:33426	gnl|BL_ORD_ID|0	100	150	0	0	67	216	562	3	67	216	150
A00456:223:HMMCCDSXX:3:1354:4761:22232	gnl|BL_ORD_ID|0	100	150	0	0	67	216	563	4	67	216	150
A00456:223:HMMCCDSXX:3:1563:17436:15280	gnl|BL_ORD_ID|0	99.333	150	1	0	67	216	564	5	67	216	150
A00456:223:HMMCCDSXX:3:1643:25111:31641	gnl|BL_ORD_ID|0	100	150	0	0	67	216	565	6	67	216	150
A00456:223:HMMCCDSXX:3:1673:8775:11553	gnl|BL_ORD_ID|0	100	150	0	0	67	216	566	7	67	216	150
A00456:223:HMMCCDSXX:3:2168:22480:20603	gnl|BL_ORD_ID|0	99.333	150	1	0	67	216	567	8	67	216	150
A00456:223:HMMCCDSXX:3:2213:11677:25473	gnl|BL_ORD_ID|0	100	150	0	0	67	216	568	9	67	216	150
A00456:223:HMMCCDSXX:3:2243:32461:9017	gnl|BL_ORD_ID|0	100	150	0	0	67	216	569	10	67	216	150
A00456:223:HMMCCDSXX:3:2317:5909:30264	gnl|BL_ORD_ID|0	100	150	0	0	67	216	570	11	67	216	150
A00456:223:HMMCCDSXX:3:2336:13295:12211	gnl|BL_ORD_ID|0	100	150	0	0	67	216	571	12	67	216	150
A00456:223:HMMCCDSXX:3:2421:8522:19100	gnl|BL_ORD_ID|0	100	150	0	0	67	216	572	13	67	216	150
A00456:223:HMMCCDSXX:3:2550:32108:36902	gnl|BL_ORD_ID|0	100	150	0	0	67	216	573	14	67	216	150
A00456:223:HMMCCDSXX:3:2551:31105:1125	gnl|BL_ORD_ID|0	100	150	0	0	67	216	574	15	67	216	150
A00456:223:HMMCCDSXX:3:2631:1922:30436	gnl|BL_ORD_ID|0	100	150	0	0	67	216	575	16	67	216	150
A00456:223:HMMCCDSXX:3:1207:29496:24674	gnl|BL_ORD_ID|0	100	150	0	0	67	216	576	17	67	216	150
A00456:223:HMMCCDSXX:3:1305:31882:5885	gnl|BL_ORD_ID|0	100	150	0	0	67	216	577	18	67	216	150
A00456:223:HMMCCDSXX:3:1305:31259:25723	gnl|BL_ORD_ID|0	100	150	0	0	67	216	578	19	67	216	150
A00456:223:HMMCCDSXX:3:1347:4309:8422	gnl|BL_ORD_ID|0	100	150	0	0	67	216	579	20	67	216	150
A00456:223:HMMCCDSXX:3:1419:2492:1517	gnl|BL_ORD_ID|0	100	150	0	0	67	216	580	21	67	216	150
A00456:223:HMMCCDSXX:3:1524:8241:29387	gnl|BL_ORD_ID|0	100	150	0	0	67	216	581	22	67	216	150
A00456:223:HMMCCDSXX:3:1551:18186:13604	gnl|BL_ORD_ID|0	100	150	0	0	67	216	582	23	67	216	150
A00456:223:HMMCCDSXX:3:1559:11424:9314	gnl|BL_ORD_ID|0	100	150	0	0	67	216	583	24	67	216	150
A00456:223:HMMCCDSXX:3:2244:25238:16141	gnl|BL_ORD_ID|0	100	150	0	0	67	216	584	25	67	216	150
A00456:223:HMMCCDSXX:3:2338:4444:23343	gnl|BL_ORD_ID|0	100	150	0	0	67	216	585	26	67	216	150
A00456:223:HMMCCDSXX:3:2373:25364:35368	gnl|BL_ORD_ID|0	100	150	0	0	67	216	586	27	67	216	150
A00456:223:HMMCCDSXX:3:2444:29875:3568	gnl|BL_ORD_ID|0	100	150	0	0	67	216	587	28	67	216	150
A00456:223:HMMCCDSXX:3:2477:18005:13041	gnl|BL_ORD_ID|0	100	150	0	0	67	216	588	29	67	216	150
A00456:223:HMMCCDSXX:3:2568:21667:26772	gnl|BL_ORD_ID|0	98	150	3	0	67	216	589	30	67	216	150
A00456:223:HMMCCDSXX:3:2568:23249:28228	gnl|BL_ORD_ID|0	100	150	0	0	67	216	590	31	67	216	150
A00456:223:HMMCCDSXX:3:2602:23294:31281	gnl|BL_ORD_ID|0	100	150	0	0	67	216	591	32	67	216	150
A00456:223:HMMCCDSXX:3:2664:5909:8938	gnl|BL_ORD_ID|0	100	150	0	0	67	216	592	33	67	216	150
A00456:223:HMMCCDSXX:3:1102:32163:34741	gnl|BL_ORD_ID|0	100	150	0	0	68	217	593	34	68	217	150
A00456:223:HMMCCDSXX:3:1243:28754:27649	gnl|BL_ORD_ID|0	100	150	0	0	68	217	594	35	68	217	150
A00456:223:HMMCCDSXX:3:1514:4200:10989	gnl|BL_ORD_ID|0	100	150	0	0	68	217	595	36	68	217	150
A00456:223:HMMCCDSXX:3:1657:9082:1532	gnl|BL_ORD_ID|0	100	150	0	0	68	217	596	1	68	217	150
A00456:223:HMMCCDSXX:3:2535:15763:12226	gnl|BL_ORD_ID|0	100	150	0	0	68	217	597	2	68	217	150
A00456:223:HMMCCDSXX:3:1123:16830:15702	gnl|BL_ORD_ID|0	100	150	0	0	68	217	598	3	68	217	150
A00456:223:HMMCCDSXX:3:1123:16857:15749	gnl|BL_ORD_ID|0	100	150	0	0	68	217	599	4	68	217	150
A00456:223:HMMCCDSXX:3:1515:5909:28009	gnl|BL_ORD_ID|0	100	150	0	0	68	217	600	5	68	217	150
A00456:223:HMMCCDSXX:3:2131:25907:10629	gnl|BL_ORD_ID|0	99.333	150	1	0	68	217	601	6	68	217	150
A00456:223:HMMCCDSXX:3:2173:25021:8876	gnl|BL_ORD_ID|0	100	150	0	0	68	217	602	7	68	217	150
A00456:223:HMMCCDSXX:3:2142:4878:34021	gnl|BL_ORD_ID|0	100	88	0	0	69	156	603	1	69	156	88
A00456:223:HMMCCDSXX:3:2560:8956:3818	gnl|BL_ORD_ID|0	100	132	0	0	69	200	604	2	69	200	132
A00456:223:HMMCCDSXX:3:2249:8088:31281	gnl|BL_ORD_ID|0	100	147	0	0	69	215	605	3	69	215	147
A00456:223:HMMCCDSXX:3:1440:7591:29168	gnl|BL_ORD_ID|0	100	148	0	0	69	216	606	4	69	216	148
A00456:223:HMMCCDSXX:3:2161:3115:20791	gnl|BL_ORD_ID|0	100	148	0	0	69	216	607	5	69	216	148
A00456:223:HMMCCDSXX:3:1105:19199:3834	gnl|BL_ORD_ID|0	100	150	0	0	69	218	608	6	69	218	150
A00456:223:HMMCCDSXX:3:1171:31512:20024	gnl|BL_ORD_ID|0	100	150	0	0	69	218	609	7	69	218	150
A00456:223:HMMCCDSXX:3:1363:18267:23703	gnl|BL_ORD_ID|0	100	150	0	0	69	218	610	8	69	218	150
A00456:223:HMMCCDSXX:3:1442:10502:17331	gnl|BL_ORD_ID|0	100	150	0	0	69	218	611	9	69	218	150
A00456:223:HMMCCDSXX:3:1646:24442:14356	gnl|BL_ORD_ID|0	100	150	0	0	69	218	612	10	69	218	150
A00456:223:HMMCCDSXX:3:1649:26078:32659	gnl|BL_ORD_ID|0	100	150	0	0	69	218	613	11	69	218	150
A00456:223:HMMCCDSXX:3:2560:28782:11913	gnl|BL_ORD_ID|0	98.667	150	2	0	69	218	614	12	69	218	150
A00456:223:HMMCCDSXX:3:2624:8440:12352	gnl|BL_ORD_ID|0	100	150	0	0	69	218	615	13	69	218	150
A00456:223:HMMCCDSXX:3:2627:16504:21872	gnl|BL_ORD_ID|0	100	150	0	0	69	218	616	14	69	218	150
A00456:223:HMMCCDSXX:3:1206:18005:26506	gnl|BL_ORD_ID|0	100	150	0	0	69	218	617	15	69	218	150
A00456:223:HMMCCDSXX:3:1242:30590:18928	gnl|BL_ORD_ID|0	100	150	0	0	69	218	618	16	69	218	150
A00456:223:HMMCCDSXX:3:1339:16984:30530	gnl|BL_ORD_ID|0	100	150	0	0	69	218	619	17	69	218	150
A00456:223:HMMCCDSXX:3:1362:23791:36996	gnl|BL_ORD_ID|0	100	150	0	0	69	218	620	18	69	218	150
A00456:223:HMMCCDSXX:3:1530:15691:2362	gnl|BL_ORD_ID|0	100	150	0	0	69	218	621	19	69	218	150
A00456:223:HMMCCDSXX:3:1548:11225:30577	gnl|BL_ORD_ID|0	100	150	0	0	69	218	622	20	69	218	150
A00456:223:HMMCCDSXX:3:1658:9950:35697	gnl|BL_ORD_ID|0	100	150	0	0	69	218	623	21	69	218	150
A00456:223:HMMCCDSXX:3:2246:24677:32957	gnl|BL_ORD_ID|0	100	150	0	0	69	218	624	22	69	218	150
A00456:223:HMMCCDSXX:3:2431:8133:8750	gnl|BL_ORD_ID|0	100	150	0	0	69	218	625	23	69	218	150
A00456:223:HMMCCDSXX:3:2653:25075:11224	gnl|BL_ORD_ID|0	100	150	0	0	69	218	626	24	69	218	150
A00456:223:HMMCCDSXX:3:1167:20826:30107	gnl|BL_ORD_ID|0	100	150	0	0	70	219	627	1	70	219	150
A00456:223:HMMCCDSXX:3:1415:22887:26537	gnl|BL_ORD_ID|0	100	150	0	0	70	219	628	2	70	219	150
A00456:223:HMMCCDSXX:3:1567:21007:10911	gnl|BL_ORD_ID|0	100	150	0	0	70	219	629	3	70	219	150
A00456:223:HMMCCDSXX:3:1627:24867:2378	gnl|BL_ORD_ID|0	100	150	0	0	70	219	630	4	70	219	150
A00456:223:HMMCCDSXX:3:1644:5475:35086	gnl|BL_ORD_ID|0	100	150	0	0	70	219	631	5	70	219	150
A00456:223:HMMCCDSXX:3:1657:23448:23093	gnl|BL_ORD_ID|0	100	150	0	0	70	219	632	6	70	219	150
A00456:223:HMMCCDSXX:3:2138:32633:24471	gnl|BL_ORD_ID|0	100	150	0	0	70	219	633	7	70	219	150
A00456:223:HMMCCDSXX:3:2141:15953:33818	gnl|BL_ORD_ID|0	100	150	0	0	70	219	634	8	70	219	150
A00456:223:HMMCCDSXX:3:2148:16966:11271	gnl|BL_ORD_ID|0	100	150	0	0	70	219	635	9	70	219	150
A00456:223:HMMCCDSXX:3:2320:28935:7701	gnl|BL_ORD_ID|0	100	150	0	0	70	219	636	10	70	219	150
A00456:223:HMMCCDSXX:3:2344:14244:24940	gnl|BL_ORD_ID|0	100	150	0	0	70	219	637	11	70	219	150
A00456:223:HMMCCDSXX:3:2402:15890:28510	gnl|BL_ORD_ID|0	100	150	0	0	70	219	638	12	70	219	150
A00456:223:HMMCCDSXX:3:2405:15148:34460	gnl|BL_ORD_ID|0	100	150	0	0	70	219	639	13	70	219	150
A00456:223:HMMCCDSXX:3:2410:26883:21339	gnl|BL_ORD_ID|0	100	150	0	0	70	219	640	14	70	219	150
A00456:223:HMMCCDSXX:3:2567:4417:11992	gnl|BL_ORD_ID|0	100	150	0	0	70	219	641	15	70	219	150
A00456:223:HMMCCDSXX:3:2604:3766:26772	gnl|BL_ORD_ID|0	100	150	0	0	70	219	642	16	70	219	150
A00456:223:HMMCCDSXX:3:1116:19443:31970	gnl|BL_ORD_ID|0	99.333	150	1	0	70	219	643	17	70	219	150
A00456:223:HMMCCDSXX:3:1369:5511:5932	gnl|BL_ORD_ID|0	100	150	0	0	70	219	644	18	70	219	150
A00456:223:HMMCCDSXX:3:1663:10782:27524	gnl|BL_ORD_ID|0	100	150	0	0	70	219	645	19	70	219	150
A00456:223:HMMCCDSXX:3:2125:11071:32158	gnl|BL_ORD_ID|0	100	150	0	0	70	219	646	20	70	219	150
A00456:223:HMMCCDSXX:3:2208:6940:23281	gnl|BL_ORD_ID|0	100	150	0	0	70	219	647	21	70	219	150
A00456:223:HMMCCDSXX:3:2252:26268:11725	gnl|BL_ORD_ID|0	100	150	0	0	70	219	648	22	70	219	150
A00456:223:HMMCCDSXX:3:2321:14353:23187	gnl|BL_ORD_ID|0	100	150	0	0	70	219	649	23	70	219	150
A00456:223:HMMCCDSXX:3:2332:30092:9236	gnl|BL_ORD_ID|0	100	150	0	0	70	219	650	24	70	219	150
A00456:223:HMMCCDSXX:3:2543:9064:6261	gnl|BL_ORD_ID|0	100	150	0	0	70	219	651	25	70	219	150
A00456:223:HMMCCDSXX:3:2553:22046:4069	gnl|BL_ORD_ID|0	100	150	0	0	70	219	652	26	70	219	150
A00456:223:HMMCCDSXX:3:2677:13422:6605	gnl|BL_ORD_ID|0	100	150	0	0	70	219	653	27	70	219	150
A00456:223:HMMCCDSXX:3:1149:18891:36088	gnl|BL_ORD_ID|0	99.333	150	1	0	72	221	654	1	72	221	150
A00456:223:HMMCCDSXX:3:1202:12138:12179	gnl|BL_ORD_ID|0	100	150	0	0	72	221	655	2	72	221	150
A00456:223:HMMCCDSXX:3:1403:25473:30859	gnl|BL_ORD_ID|0	100	150	0	0	72	221	656	3	72	221	150
A00456:223:HMMCCDSXX:3:1602:20627:8938	gnl|BL_ORD_ID|0	100	150	0	0	72	221	657	4	72	221	150
A00456:223:HMMCCDSXX:3:2328:25735:27211	gnl|BL_ORD_ID|0	100	150	0	0	72	221	658	5	72	221	150
A00456:223:HMMCCDSXX:3:2361:27082:5431	gnl|BL_ORD_ID|0	100	150	0	0	72	221	659	6	72	221	150
A00456:223:HMMCCDSXX:3:2412:15609:4820	gnl|BL_ORD_ID|0	100	150	0	0	72	221	660	7	72	221	150
A00456:223:HMMCCDSXX:3:2609:18313:14857	gnl|BL_ORD_ID|0	100	150	0	0	72	221	661	8	72	221	150
A00456:223:HMMCCDSXX:3:2609:18123:18537	gnl|BL_ORD_ID|0	98.667	150	2	0	72	221	662	9	72	221	150
A00456:223:HMMCCDSXX:3:2650:13693:34444	gnl|BL_ORD_ID|0	100	150	0	0	72	221	663	10	72	221	150
A00456:223:HMMCCDSXX:3:1103:19217:25473	gnl|BL_ORD_ID|0	100	150	0	0	72	221	664	11	72	221	150
A00456:223:HMMCCDSXX:3:1119:18909:6026	gnl|BL_ORD_ID|0	100	150	0	0	72	221	665	12	72	221	150
A00456:223:HMMCCDSXX:3:1119:19651:8187	gnl|BL_ORD_ID|0	100	150	0	0	72	221	666	13	72	221	150
A00456:223:HMMCCDSXX:3:1226:12527:32612	gnl|BL_ORD_ID|0	99.333	150	1	0	72	221	667	14	72	221	150
A00456:223:HMMCCDSXX:3:1246:26422:26866	gnl|BL_ORD_ID|0	100	150	0	0	72	221	668	15	72	221	150
A00456:223:HMMCCDSXX:3:1403:7518:19586	gnl|BL_ORD_ID|0	100	150	0	0	72	221	669	16	72	221	150
A00456:223:HMMCCDSXX:3:1403:7464:19930	gnl|BL_ORD_ID|0	100	150	0	0	72	221	670	17	72	221	150
A00456:223:HMMCCDSXX:3:1417:1642:34648	gnl|BL_ORD_ID|0	99.333	150	1	0	72	221	671	18	72	221	150
A00456:223:HMMCCDSXX:3:1417:1949:36057	gnl|BL_ORD_ID|0	100	150	0	0	72	221	672	19	72	221	150
A00456:223:HMMCCDSXX:3:1464:8793:29653	gnl|BL_ORD_ID|0	99.333	150	1	0	72	221	673	20	72	221	150
A00456:223:HMMCCDSXX:3:2205:2691:14826	gnl|BL_ORD_ID|0	100	150	0	0	72	221	674	21	72	221	150
A00456:223:HMMCCDSXX:3:2541:4761:28056	gnl|BL_ORD_ID|0	99.333	150	1	0	72	221	675	22	72	221	150
A00456:223:HMMCCDSXX:3:1101:6705:18740	gnl|BL_ORD_ID|0	93.333	150	10	0	73	222	676	1	73	222	150
A00456:223:HMMCCDSXX:3:1127:27832:30029	gnl|BL_ORD_ID|0	100	150	0	0	73	222	677	2	73	222	150
A00456:223:HMMCCDSXX:3:1158:8250:31939	gnl|BL_ORD_ID|0	100	150	0	0	73	222	678	3	73	222	150
A00456:223:HMMCCDSXX:3:1672:12020:27038	gnl|BL_ORD_ID|0	100	150	0	0	73	222	679	4	73	222	150
A00456:223:HMMCCDSXX:3:1278:20202:19069	gnl|BL_ORD_ID|0	100	150	0	0	73	222	680	5	73	222	150
A00456:223:HMMCCDSXX:3:2274:22299:21605	gnl|BL_ORD_ID|0	100	150	0	0	73	222	681	6	73	222	150
A00456:223:HMMCCDSXX:3:2424:27082:24283	gnl|BL_ORD_ID|0	100	150	0	0	73	222	682	7	73	222	150
A00456:223:HMMCCDSXX:3:2507:24876:31986	gnl|BL_ORD_ID|0	100	150	0	0	73	222	683	8	73	222	150
A00456:223:HMMCCDSXX:3:1263:16197:13730	gnl|BL_ORD_ID|0	100	150	0	0	74	223	684	1	74	223	150
A00456:223:HMMCCDSXX:3:2317:5909:30264	gnl|BL_ORD_ID|0	98	150	3	0	74	223	685	2	74	223	150
A00456:223:HMMCCDSXX:3:2451:15980:7748	gnl|BL_ORD_ID|0	100	150	0	0	74	223	686	3	74	223	150
A00456:223:HMMCCDSXX:3:1145:13232:15577	gnl|BL_ORD_ID|0	100	150	0	0	74	223	687	4	74	223	150
A00456:223:HMMCCDSXX:3:1210:27272:5948	gnl|BL_ORD_ID|0	100	150	0	0	74	223	688	5	74	223	150
A00456:223:HMMCCDSXX:3:1210:27615:6355	gnl|BL_ORD_ID|0	100	150	0	0	74	223	689	6	74	223	150
A00456:223:HMMCCDSXX:3:1215:12698:28025	gnl|BL_ORD_ID|0	100	150	0	0	74	223	690	7	74	223	150
A00456:223:HMMCCDSXX:3:1222:11758:30655	gnl|BL_ORD_ID|0	99.333	150	1	0	74	223	691	8	74	223	150
A00456:223:HMMCCDSXX:3:1229:8413:13088	gnl|BL_ORD_ID|0	100	150	0	0	74	223	692	9	74	223	150
A00456:223:HMMCCDSXX:3:1262:28239:23437	gnl|BL_ORD_ID|0	100	150	0	0	74	223	693	10	74	223	150
A00456:223:HMMCCDSXX:3:1469:26648:13103	gnl|BL_ORD_ID|0	100	150	0	0	74	223	694	11	74	223	150
A00456:223:HMMCCDSXX:3:1509:13829:12383	gnl|BL_ORD_ID|0	100	150	0	0	74	223	695	12	74	223	150
A00456:223:HMMCCDSXX:3:1529:31186:29763	gnl|BL_ORD_ID|0	100	150	0	0	74	223	696	13	74	223	150
A00456:223:HMMCCDSXX:3:1537:25934:8077	gnl|BL_ORD_ID|0	100	150	0	0	74	223	697	14	74	223	150
A00456:223:HMMCCDSXX:3:1573:27073:34538	gnl|BL_ORD_ID|0	100	150	0	0	74	223	698	15	74	223	150
A00456:223:HMMCCDSXX:3:1617:23963:20603	gnl|BL_ORD_ID|0	100	150	0	0	74	223	699	16	74	223	150
A00456:223:HMMCCDSXX:3:1636:21124:5760	gnl|BL_ORD_ID|0	100	150	0	0	74	223	700	17	74	223	150
A00456:223:HMMCCDSXX:3:1637:6940:21120	gnl|BL_ORD_ID|0	100	150	0	0	74	223	701	18	74	223	150
A00456:223:HMMCCDSXX:3:1673:3405:29371	gnl|BL_ORD_ID|0	100	150	0	0	74	223	702	19	74	223	150
A00456:223:HMMCCDSXX:3:2124:2284:29778	gnl|BL_ORD_ID|0	100	150	0	0	74	223	703	20	74	223	150
A00456:223:HMMCCDSXX:3:2169:4444:13917	gnl|BL_ORD_ID|0	100	150	0	0	74	223	704	21	74	223	150
A00456:223:HMMCCDSXX:3:2178:31467:24549	gnl|BL_ORD_ID|0	100	150	0	0	74	223	705	22	74	223	150
A00456:223:HMMCCDSXX:3:2228:26467:27320	gnl|BL_ORD_ID|0	100	150	0	0	74	223	706	23	74	223	150
A00456:223:HMMCCDSXX:3:2303:2546:23719	gnl|BL_ORD_ID|0	100	150	0	0	74	223	707	24	74	223	150
A00456:223:HMMCCDSXX:3:2323:14199:26897	gnl|BL_ORD_ID|0	100	150	0	0	74	223	708	25	74	223	150
A00456:223:HMMCCDSXX:3:2363:3378:1799	gnl|BL_ORD_ID|0	100	150	0	0	74	223	709	26	74	223	150
A00456:223:HMMCCDSXX:3:2437:28348:24972	gnl|BL_ORD_ID|0	100	150	0	0	74	223	710	27	74	223	150
A00456:223:HMMCCDSXX:3:2501:13376:3270	gnl|BL_ORD_ID|0	98	150	3	0	74	223	711	28	74	223	150
A00456:223:HMMCCDSXX:3:2501:14705:4633	gnl|BL_ORD_ID|0	100	150	0	0	74	223	712	29	74	223	150
A00456:223:HMMCCDSXX:3:2527:7509:7576	gnl|BL_ORD_ID|0	100	150	0	0	74	223	713	30	74	223	150
A00456:223:HMMCCDSXX:3:2573:25437:16329	gnl|BL_ORD_ID|0	100	150	0	0	74	223	714	31	74	223	150
A00456:223:HMMCCDSXX:3:2573:30183:21418	gnl|BL_ORD_ID|0	100	150	0	0	74	223	715	32	74	223	150
A00456:223:HMMCCDSXX:3:2607:23791:12665	gnl|BL_ORD_ID|0	100	150	0	0	74	223	716	33	74	223	150
A00456:223:HMMCCDSXX:3:2612:25536:10175	gnl|BL_ORD_ID|0	100	150	0	0	74	223	717	34	74	223	150
A00456:223:HMMCCDSXX:3:2659:6108:23281	gnl|BL_ORD_ID|0	100	150	0	0	74	223	718	35	74	223	150
A00456:223:HMMCCDSXX:3:1117:26377:16705	gnl|BL_ORD_ID|0	100	150	0	0	74	223	719	36	74	223	150
A00456:223:HMMCCDSXX:3:1133:14389:17957	gnl|BL_ORD_ID|0	100	150	0	0	74	223	720	37	74	223	150
A00456:223:HMMCCDSXX:3:1138:1886:9048	gnl|BL_ORD_ID|0	100	150	0	0	74	223	721	38	74	223	150
A00456:223:HMMCCDSXX:3:1161:16450:2957	gnl|BL_ORD_ID|0	100	150	0	0	74	223	722	39	74	223	150
A00456:223:HMMCCDSXX:3:1164:6171:9518	gnl|BL_ORD_ID|0	100	150	0	0	74	223	723	40	74	223	150
A00456:223:HMMCCDSXX:3:1206:29857:15374	gnl|BL_ORD_ID|0	100	150	0	0	74	223	724	41	74	223	150
A00456:223:HMMCCDSXX:3:1211:17246:33113	gnl|BL_ORD_ID|0	100	150	0	0	74	223	725	42	74	223	150
A00456:223:HMMCCDSXX:3:1216:28989:15906	gnl|BL_ORD_ID|0	100	150	0	0	74	223	726	43	74	223	150
A00456:223:HMMCCDSXX:3:1217:22779:21026	gnl|BL_ORD_ID|0	100	150	0	0	74	223	727	44	74	223	150
A00456:223:HMMCCDSXX:3:1269:1081:21590	gnl|BL_ORD_ID|0	100	150	0	0	74	223	728	45	74	223	150
A00456:223:HMMCCDSXX:3:1368:32452:2926	gnl|BL_ORD_ID|0	100	150	0	0	74	223	729	46	74	223	150
A00456:223:HMMCCDSXX:3:1376:2754:29371	gnl|BL_ORD_ID|0	100	150	0	0	74	223	730	47	74	223	150
A00456:223:HMMCCDSXX:3:1450:1253:35697	gnl|BL_ORD_ID|0	100	150	0	0	74	223	731	48	74	223	150
A00456:223:HMMCCDSXX:3:1468:18539:28463	gnl|BL_ORD_ID|0	100	150	0	0	74	223	732	49	74	223	150
A00456:223:HMMCCDSXX:3:1546:18511:29418	gnl|BL_ORD_ID|0	100	150	0	0	74	223	733	50	74	223	150
A00456:223:HMMCCDSXX:3:1615:4562:16407	gnl|BL_ORD_ID|0	100	150	0	0	74	223	734	51	74	223	150
A00456:223:HMMCCDSXX:3:2124:27434:27555	gnl|BL_ORD_ID|0	100	150	0	0	74	223	735	52	74	223	150
A00456:223:HMMCCDSXX:3:2131:4119:8594	gnl|BL_ORD_ID|0	100	150	0	0	74	223	736	53	74	223	150
A00456:223:HMMCCDSXX:3:2133:13919:21809	gnl|BL_ORD_ID|0	100	150	0	0	74	223	737	54	74	223	150
A00456:223:HMMCCDSXX:3:2204:26639:36385	gnl|BL_ORD_ID|0	100	150	0	0	74	223	738	55	74	223	150
A00456:223:HMMCCDSXX:3:2312:6777:16360	gnl|BL_ORD_ID|0	100	150	0	0	74	223	739	56	74	223	150
A00456:223:HMMCCDSXX:3:2316:10484:15170	gnl|BL_ORD_ID|0	100	150	0	0	74	223	740	57	74	223	150
A00456:223:HMMCCDSXX:3:2469:18521:6887	gnl|BL_ORD_ID|0	100	150	0	0	74	223	741	58	74	223	150
A00456:223:HMMCCDSXX:3:2540:22110:18740	gnl|BL_ORD_ID|0	100	150	0	0	74	223	742	59	74	223	150
A00456:223:HMMCCDSXX:3:2541:15591:5541	gnl|BL_ORD_ID|0	100	150	0	0	74	223	743	60	74	223	150
A00456:223:HMMCCDSXX:3:2611:5611:6010	gnl|BL_ORD_ID|0	100	150	0	0	74	223	744	61	74	223	150
A00456:223:HMMCCDSXX:3:2625:16767:23641	gnl|BL_ORD_ID|0	100	150	0	0	74	223	745	62	74	223	150
A00456:223:HMMCCDSXX:3:2651:5900:24361	gnl|BL_ORD_ID|0	99.333	150	1	0	74	223	746	63	74	223	150
A00456:223:HMMCCDSXX:3:2657:12997:8406	gnl|BL_ORD_ID|0	100	150	0	0	74	223	747	64	74	223	150
A00456:223:HMMCCDSXX:3:2675:11189:36777	gnl|BL_ORD_ID|0	100	150	0	0	74	223	748	65	74	223	150
A00456:223:HMMCCDSXX:3:1109:25473:8625	gnl|BL_ORD_ID|0	100	150	0	0	75	224	749	1	75	224	150
A00456:223:HMMCCDSXX:3:1122:13512:35884	gnl|BL_ORD_ID|0	100	150	0	0	75	224	750	2	75	224	150
A00456:223:HMMCCDSXX:3:1125:23619:34569	gnl|BL_ORD_ID|0	100	150	0	0	75	224	751	3	75	224	150
A00456:223:HMMCCDSXX:3:1154:13087:25692	gnl|BL_ORD_ID|0	100	150	0	0	75	224	752	4	75	224	150
A00456:223:HMMCCDSXX:3:1154:13901:27633	gnl|BL_ORD_ID|0	100	150	0	0	75	224	753	5	75	224	150
A00456:223:HMMCCDSXX:3:1207:26720:3208	gnl|BL_ORD_ID|0	100	150	0	0	75	224	754	6	75	224	150
A00456:223:HMMCCDSXX:3:1224:14796:26835	gnl|BL_ORD_ID|0	100	150	0	0	75	224	755	7	75	224	150
A00456:223:HMMCCDSXX:3:1303:27471:33974	gnl|BL_ORD_ID|0	100	150	0	0	75	224	756	8	75	224	150
A00456:223:HMMCCDSXX:3:1402:10529:7106	gnl|BL_ORD_ID|0	100	150	0	0	75	224	757	9	75	224	150
A00456:223:HMMCCDSXX:3:1402:10484:11036	gnl|BL_ORD_ID|0	100	150	0	0	75	224	758	10	75	224	150
A00456:223:HMMCCDSXX:3:1465:25898:3286	gnl|BL_ORD_ID|0	100	150	0	0	75	224	759	11	75	224	150
A00456:223:HMMCCDSXX:3:1477:2555:27430	gnl|BL_ORD_ID|0	100	150	0	0	75	224	760	12	75	224	150
A00456:223:HMMCCDSXX:3:1667:10411:24377	gnl|BL_ORD_ID|0	100	150	0	0	75	224	761	13	75	224	150
A00456:223:HMMCCDSXX:3:2153:22281:1877	gnl|BL_ORD_ID|0	100	150	0	0	75	224	762	14	75	224	150
A00456:223:HMMCCDSXX:3:2174:10538:21465	gnl|BL_ORD_ID|0	100	150	0	0	75	224	763	15	75	224	150
A00456:223:HMMCCDSXX:3:2205:8603:23093	gnl|BL_ORD_ID|0	100	150	0	0	75	224	764	16	75	224	150
A00456:223:HMMCCDSXX:3:2211:10547:9674	gnl|BL_ORD_ID|0	100	150	0	0	75	224	765	17	75	224	150
A00456:223:HMMCCDSXX:3:2256:32696:9204	gnl|BL_ORD_ID|0	100	150	0	0	75	224	766	18	75	224	150
A00456:223:HMMCCDSXX:3:2260:16848:24972	gnl|BL_ORD_ID|0	100	150	0	0	75	224	767	19	75	224	150
A00456:223:HMMCCDSXX:3:2277:32054:17581	gnl|BL_ORD_ID|0	100	150	0	0	75	224	768	20	75	224	150
A00456:223:HMMCCDSXX:3:2311:3549:5071	gnl|BL_ORD_ID|0	100	150	0	0	75	224	769	21	75	224	150
A00456:223:HMMCCDSXX:3:2325:16477:26334	gnl|BL_ORD_ID|0	100	150	0	0	75	224	770	22	75	224	150
A00456:223:HMMCCDSXX:3:2353:28809:24236	gnl|BL_ORD_ID|0	100	150	0	0	75	224	771	23	75	224	150
A00456:223:HMMCCDSXX:3:2454:24596:28244	gnl|BL_ORD_ID|0	100	150	0	0	75	224	772	24	75	224	150
A00456:223:HMMCCDSXX:3:2454:25699:29340	gnl|BL_ORD_ID|0	98	150	3	0	75	224	773	25	75	224	150
A00456:223:HMMCCDSXX:3:2462:18304:12117	gnl|BL_ORD_ID|0	100	150	0	0	75	224	774	26	75	224	150
A00456:223:HMMCCDSXX:3:2465:6090:12633	gnl|BL_ORD_ID|0	100	150	0	0	75	224	775	27	75	224	150
A00456:223:HMMCCDSXX:3:2543:28953:1752	gnl|BL_ORD_ID|0	99.333	150	1	0	75	224	776	28	75	224	150
A00456:223:HMMCCDSXX:3:2548:18358:31375	gnl|BL_ORD_ID|0	100	150	0	0	75	224	777	29	75	224	150
A00456:223:HMMCCDSXX:3:2570:24740:30185	gnl|BL_ORD_ID|0	100	150	0	0	75	224	778	30	75	224	150
A00456:223:HMMCCDSXX:3:2571:1750:23844	gnl|BL_ORD_ID|0	100	150	0	0	75	224	779	31	75	224	150
A00456:223:HMMCCDSXX:3:2669:14181:5885	gnl|BL_ORD_ID|0	100	150	0	0	75	224	780	32	75	224	150
A00456:223:HMMCCDSXX:3:1116:1190:25942	gnl|BL_ORD_ID|0	100	150	0	0	75	224	781	33	75	224	150
A00456:223:HMMCCDSXX:3:1133:15790:20134	gnl|BL_ORD_ID|0	100	150	0	0	75	224	782	34	75	224	150
A00456:223:HMMCCDSXX:3:1176:2899:26083	gnl|BL_ORD_ID|0	100	150	0	0	75	224	783	35	75	224	150
A00456:223:HMMCCDSXX:3:1215:10945:25238	gnl|BL_ORD_ID|0	100	150	0	0	75	224	784	36	75	224	150
A00456:223:HMMCCDSXX:3:1223:15600:11443	gnl|BL_ORD_ID|0	100	150	0	0	75	224	785	37	75	224	150
A00456:223:HMMCCDSXX:3:1243:30228:3051	gnl|BL_ORD_ID|0	100	150	0	0	75	224	786	38	75	224	150
A00456:223:HMMCCDSXX:3:1247:28447:16282	gnl|BL_ORD_ID|0	100	150	0	0	75	224	787	39	75	224	150
A00456:223:HMMCCDSXX:3:1277:2862:32158	gnl|BL_ORD_ID|0	99.333	150	1	0	75	224	788	40	75	224	150
A00456:223:HMMCCDSXX:3:1408:15872:13949	gnl|BL_ORD_ID|0	100	150	0	0	75	224	789	41	75	224	150
A00456:223:HMMCCDSXX:3:1430:26666:24659	gnl|BL_ORD_ID|0	100	150	0	0	75	224	790	42	75	224	150
A00456:223:HMMCCDSXX:3:1509:7383:16282	gnl|BL_ORD_ID|0	100	150	0	0	75	224	791	43	75	224	150
A00456:223:HMMCCDSXX:3:1557:17255:23672	gnl|BL_ORD_ID|0	100	150	0	0	75	224	792	44	75	224	150
A00456:223:HMMCCDSXX:3:1559:16052:4147	gnl|BL_ORD_ID|0	99.333	150	1	0	75	224	793	45	75	224	150
A00456:223:HMMCCDSXX:3:1564:32009:22576	gnl|BL_ORD_ID|0	99.333	150	1	0	75	224	794	46	75	224	150
A00456:223:HMMCCDSXX:3:1668:23439:31125	gnl|BL_ORD_ID|0	100	150	0	0	75	224	795	47	75	224	150
A00456:223:HMMCCDSXX:3:2101:4273:13275	gnl|BL_ORD_ID|0	100	150	0	0	75	224	796	48	75	224	150
A00456:223:HMMCCDSXX:3:2165:19289:16423	gnl|BL_ORD_ID|0	100	150	0	0	75	224	797	49	75	224	150
A00456:223:HMMCCDSXX:3:2253:27199:23610	gnl|BL_ORD_ID|0	100	150	0	0	75	224	798	50	75	224	150
A00456:223:HMMCCDSXX:3:2277:30933:29575	gnl|BL_ORD_ID|0	100	150	0	0	75	224	799	51	75	224	150
A00456:223:HMMCCDSXX:3:2323:4164:24455	gnl|BL_ORD_ID|0	100	150	0	0	75	224	800	52	75	224	150
A00456:223:HMMCCDSXX:3:2370:10095:25645	gnl|BL_ORD_ID|0	100	150	0	0	75	224	801	53	75	224	150
A00456:223:HMMCCDSXX:3:2423:27670:31532	gnl|BL_ORD_ID|0	100	150	0	0	75	224	802	54	75	224	150
A00456:223:HMMCCDSXX:3:2423:28691:31923	gnl|BL_ORD_ID|0	100	150	0	0	75	224	803	55	75	224	150
A00456:223:HMMCCDSXX:3:2472:21640:25911	gnl|BL_ORD_ID|0	100	150	0	0	75	224	804	56	75	224	150
A00456:223:HMMCCDSXX:3:2514:21133:22811	gnl|BL_ORD_ID|0	100	150	0	0	75	224	805	57	75	224	150
A00456:223:HMMCCDSXX:3:2518:25491:31986	gnl|BL_ORD_ID|0	100	150	0	0	75	224	806	58	75	224	150
A00456:223:HMMCCDSXX:3:2645:9688:12947	gnl|BL_ORD_ID|0	100	150	0	0	75	224	807	59	75	224	150
A00456:223:HMMCCDSXX:3:2657:13015:33677	gnl|BL_ORD_ID|0	100	150	0	0	75	224	808	60	75	224	150
A00456:223:HMMCCDSXX:3:2657:12418:34053	gnl|BL_ORD_ID|0	100	150	0	0	75	224	809	61	75	224	150
A00456:223:HMMCCDSXX:3:1530:11071:1939	gnl|BL_ORD_ID|0	99.338	151	1	1	75	225	810	62	75	225	151
A00456:223:HMMCCDSXX:3:1238:12698:30718	gnl|BL_ORD_ID|0	100	148	0	0	76	223	811	1	76	223	148
A00456:223:HMMCCDSXX:3:1241:28492:15671	gnl|BL_ORD_ID|0	100	150	0	0	76	225	812	2	76	225	150
A00456:223:HMMCCDSXX:3:2517:8784:22060	gnl|BL_ORD_ID|0	100	150	0	0	76	225	813	3	76	225	150
A00456:223:HMMCCDSXX:3:2517:8974:28181	gnl|BL_ORD_ID|0	100	150	0	0	76	225	814	4	76	225	150
A00456:223:HMMCCDSXX:3:2540:26277:19163	gnl|BL_ORD_ID|0	100	150	0	0	76	225	815	5	76	225	150
A00456:223:HMMCCDSXX:3:2472:21640:25911	gnl|BL_ORD_ID|0	100	150	0	0	77	226	816	1	77	226	150
A00456:223:HMMCCDSXX:3:1612:21775:1219	gnl|BL_ORD_ID|0	100	150	0	0	77	226	817	2	77	226	150
A00456:223:HMMCCDSXX:3:1138:21115:4930	gnl|BL_ORD_ID|0	100	150	0	0	77	226	818	3	77	226	150
A00456:223:HMMCCDSXX:3:1166:29197:32268	gnl|BL_ORD_ID|0	100	150	0	0	77	226	819	4	77	226	150
A00456:223:HMMCCDSXX:3:1348:4508:29340	gnl|BL_ORD_ID|0	100	150	0	0	77	226	820	5	77	226	150
A00456:223:HMMCCDSXX:3:1360:26675:23077	gnl|BL_ORD_ID|0	100	150	0	0	77	226	821	6	77	226	150
A00456:223:HMMCCDSXX:3:1574:4987:13573	gnl|BL_ORD_ID|0	100	150	0	0	77	226	822	7	77	226	150
A00456:223:HMMCCDSXX:3:2133:11415:7138	gnl|BL_ORD_ID|0	100	150	0	0	77	226	823	8	77	226	150
A00456:223:HMMCCDSXX:3:2412:27434:21073	gnl|BL_ORD_ID|0	100	150	0	0	77	226	824	9	77	226	150
A00456:223:HMMCCDSXX:3:2462:6470:15640	gnl|BL_ORD_ID|0	100	150	0	0	77	226	825	10	77	226	150
A00456:223:HMMCCDSXX:3:2530:1805:1454	gnl|BL_ORD_ID|0	100	150	0	0	77	226	826	11	77	226	150
A00456:223:HMMCCDSXX:3:1305:24758:2284	gnl|BL_ORD_ID|0	100	150	0	0	77	226	827	12	77	226	150
A00456:223:HMMCCDSXX:3:1305:6262:32941	gnl|BL_ORD_ID|0	100	150	0	0	77	226	828	13	77	226	150
A00456:223:HMMCCDSXX:3:1505:10574:32362	gnl|BL_ORD_ID|0	100	150	0	0	77	226	829	14	77	226	150
A00456:223:HMMCCDSXX:3:1665:3604:6668	gnl|BL_ORD_ID|0	100	150	0	0	77	226	830	15	77	226	150
A00456:223:HMMCCDSXX:3:2130:9046:5228	gnl|BL_ORD_ID|0	100	150	0	0	77	226	831	16	77	226	150
A00456:223:HMMCCDSXX:3:2304:18050:29309	gnl|BL_ORD_ID|0	100	150	0	0	77	226	832	17	77	226	150
A00456:223:HMMCCDSXX:3:2345:28818:9251	gnl|BL_ORD_ID|0	100	150	0	0	77	226	833	18	77	226	150
A00456:223:HMMCCDSXX:3:2534:9353:9236	gnl|BL_ORD_ID|0	99.333	150	1	0	78	227	834	1	78	227	150
A00456:223:HMMCCDSXX:3:1369:17128:36573	gnl|BL_ORD_ID|0	100	150	0	0	78	227	835	2	78	227	150
A00456:223:HMMCCDSXX:3:2662:1316:26819	gnl|BL_ORD_ID|0	100	150	0	0	78	227	836	3	78	227	150
A00456:223:HMMCCDSXX:3:1108:9227:28839	gnl|BL_ORD_ID|0	100	150	0	0	78	227	837	4	78	227	150
A00456:223:HMMCCDSXX:3:1567:17246:25661	gnl|BL_ORD_ID|0	100	150	0	0	78	227	838	5	78	227	150
A00456:223:HMMCCDSXX:3:2253:4110:16063	gnl|BL_ORD_ID|0	100	150	0	0	78	227	839	6	78	227	150
A00456:223:HMMCCDSXX:3:2253:4128:16031	gnl|BL_ORD_ID|0	100	150	0	0	78	227	840	7	78	227	150
A00456:223:HMMCCDSXX:3:2439:21838:19398	gnl|BL_ORD_ID|0	100	150	0	0	78	227	841	8	78	227	150
A00456:223:HMMCCDSXX:3:2669:10872:28369	gnl|BL_ORD_ID|0	100	150	0	0	78	227	842	9	78	227	150
A00456:223:HMMCCDSXX:3:1417:8865:26960	gnl|BL_ORD_ID|0	100	150	0	0	79	228	843	1	79	228	150
A00456:223:HMMCCDSXX:3:2657:13015:33677	gnl|BL_ORD_ID|0	100	150	0	0	79	228	844	2	79	228	150
A00456:223:HMMCCDSXX:3:2657:12418:34053	gnl|BL_ORD_ID|0	100	150	0	0	79	228	845	3	79	228	150
A00456:223:HMMCCDSXX:3:1321:31855:23281	gnl|BL_ORD_ID|0	100	150	0	0	79	228	846	4	79	228	150
A00456:223:HMMCCDSXX:3:1336:10592:9064	gnl|BL_ORD_ID|0	100	150	0	0	79	228	847	5	79	228	150
A00456:223:HMMCCDSXX:3:1459:24044:15076	gnl|BL_ORD_ID|0	100	150	0	0	79	228	848	6	79	228	150
A00456:223:HMMCCDSXX:3:1609:9968:10081	gnl|BL_ORD_ID|0	100	150	0	0	79	228	849	7	79	228	150
A00456:223:HMMCCDSXX:3:1126:1461:3740	gnl|BL_ORD_ID|0	100	150	0	0	79	228	850	8	79	228	150
A00456:223:HMMCCDSXX:3:1444:6216:31328	gnl|BL_ORD_ID|0	100	150	0	0	79	228	851	9	79	228	150
A00456:223:HMMCCDSXX:3:1444:6280:31657	gnl|BL_ORD_ID|0	100	150	0	0	79	228	852	10	79	228	150
A00456:223:HMMCCDSXX:3:1444:6388:31626	gnl|BL_ORD_ID|0	100	150	0	0	79	228	853	11	79	228	150
A00456:223:HMMCCDSXX:3:1503:22281:18881	gnl|BL_ORD_ID|0	100	150	0	0	79	228	854	12	79	228	150
A00456:223:HMMCCDSXX:3:1505:1877:21151	gnl|BL_ORD_ID|0	100	150	0	0	79	228	855	13	79	228	150
A00456:223:HMMCCDSXX:3:2125:3152:33786	gnl|BL_ORD_ID|0	100	150	0	0	79	228	856	14	79	228	150
A00456:223:HMMCCDSXX:3:2459:2844:2910	gnl|BL_ORD_ID|0	100	150	0	0	79	228	857	15	79	228	150
A00456:223:HMMCCDSXX:3:2460:1615:31626	gnl|BL_ORD_ID|0	100	150	0	0	79	228	858	16	79	228	150
A00456:223:HMMCCDSXX:3:2540:22110:18740	gnl|BL_ORD_ID|0	100	150	0	0	80	229	859	1	80	229	150
A00456:223:HMMCCDSXX:3:1241:25301:26083	gnl|BL_ORD_ID|0	100	150	0	0	80	229	860	2	80	229	150
A00456:223:HMMCCDSXX:3:2461:17246:5212	gnl|BL_ORD_ID|0	97.333	150	4	0	80	229	861	3	80	229	150
A00456:223:HMMCCDSXX:3:1110:13277:7607	gnl|BL_ORD_ID|0	100	150	0	0	80	229	862	4	80	229	150
A00456:223:HMMCCDSXX:3:1124:13557:32643	gnl|BL_ORD_ID|0	100	150	0	0	80	229	863	5	80	229	150
A00456:223:HMMCCDSXX:3:1135:29469:31767	gnl|BL_ORD_ID|0	100	150	0	0	80	229	864	6	80	229	150
A00456:223:HMMCCDSXX:3:1176:21215:9142	gnl|BL_ORD_ID|0	100	150	0	0	80	229	865	7	80	229	150
A00456:223:HMMCCDSXX:3:1176:21323:9267	gnl|BL_ORD_ID|0	100	150	0	0	80	229	866	8	80	229	150
A00456:223:HMMCCDSXX:3:1202:17237:36072	gnl|BL_ORD_ID|0	100	150	0	0	80	229	867	9	80	229	150
A00456:223:HMMCCDSXX:3:1239:12472:34867	gnl|BL_ORD_ID|0	100	150	0	0	80	229	868	10	80	229	150
A00456:223:HMMCCDSXX:3:1242:24189:27884	gnl|BL_ORD_ID|0	99.333	150	1	0	80	229	869	11	80	229	150
A00456:223:HMMCCDSXX:3:1247:16613:9157	gnl|BL_ORD_ID|0	98.667	150	2	0	80	229	870	12	80	229	150
A00456:223:HMMCCDSXX:3:1265:4001:29559	gnl|BL_ORD_ID|0	100	150	0	0	80	229	871	13	80	229	150
A00456:223:HMMCCDSXX:3:1275:23538:10723	gnl|BL_ORD_ID|0	100	150	0	0	80	229	872	14	80	229	150
A00456:223:HMMCCDSXX:3:1319:6352:36855	gnl|BL_ORD_ID|0	100	150	0	0	80	229	873	15	80	229	150
A00456:223:HMMCCDSXX:3:1320:30626:21277	gnl|BL_ORD_ID|0	100	150	0	0	80	229	874	16	80	229	150
A00456:223:HMMCCDSXX:3:1324:17002:27837	gnl|BL_ORD_ID|0	98	150	3	0	80	229	875	17	80	229	150
A00456:223:HMMCCDSXX:3:1324:16866:28009	gnl|BL_ORD_ID|0	100	150	0	0	80	229	876	18	80	229	150
A00456:223:HMMCCDSXX:3:1357:29505:24439	gnl|BL_ORD_ID|0	100	150	0	0	80	229	877	19	80	229	150
A00456:223:HMMCCDSXX:3:1363:27543:29684	gnl|BL_ORD_ID|0	100	150	0	0	80	229	878	20	80	229	150
A00456:223:HMMCCDSXX:3:1363:21947:34115	gnl|BL_ORD_ID|0	100	150	0	0	80	229	879	21	80	229	150
A00456:223:HMMCCDSXX:3:1371:32958:17237	gnl|BL_ORD_ID|0	100	150	0	0	80	229	880	22	80	229	150
A00456:223:HMMCCDSXX:3:1414:7817:23547	gnl|BL_ORD_ID|0	100	150	0	0	80	229	881	23	80	229	150
A00456:223:HMMCCDSXX:3:1466:19162:3427	gnl|BL_ORD_ID|0	100	150	0	0	80	229	882	24	80	229	150
A00456:223:HMMCCDSXX:3:1476:18738:7576	gnl|BL_ORD_ID|0	100	150	0	0	80	229	883	25	80	229	150
A00456:223:HMMCCDSXX:3:1517:19063:9079	gnl|BL_ORD_ID|0	100	150	0	0	80	229	884	26	80	229	150
A00456:223:HMMCCDSXX:3:1530:16821:13401	gnl|BL_ORD_ID|0	100	150	0	0	80	229	885	27	80	229	150
A00456:223:HMMCCDSXX:3:1557:17589:16736	gnl|BL_ORD_ID|0	100	150	0	0	80	229	886	28	80	229	150
A00456:223:HMMCCDSXX:3:1626:5683:17033	gnl|BL_ORD_ID|0	100	150	0	0	80	229	887	29	80	229	150
A00456:223:HMMCCDSXX:3:1662:5014:12179	gnl|BL_ORD_ID|0	100	150	0	0	80	229	888	30	80	229	150
A00456:223:HMMCCDSXX:3:1666:8793:27993	gnl|BL_ORD_ID|0	100	150	0	0	80	229	889	31	80	229	150
A00456:223:HMMCCDSXX:3:2123:4463:35055	gnl|BL_ORD_ID|0	100	150	0	0	80	229	890	32	80	229	150
A00456:223:HMMCCDSXX:3:2146:9796:27352	gnl|BL_ORD_ID|0	100	150	0	0	80	229	891	33	80	229	150
A00456:223:HMMCCDSXX:3:2146:9390:27680	gnl|BL_ORD_ID|0	100	150	0	0	80	229	892	34	80	229	150
A00456:223:HMMCCDSXX:3:2224:8748:16329	gnl|BL_ORD_ID|0	100	150	0	0	80	229	893	35	80	229	150
A00456:223:HMMCCDSXX:3:2252:16387:28902	gnl|BL_ORD_ID|0	100	150	0	0	80	229	894	36	80	229	150
A00456:223:HMMCCDSXX:3:2254:11035:15342	gnl|BL_ORD_ID|0	100	150	0	0	80	229	895	37	80	229	150
A00456:223:HMMCCDSXX:3:2339:29206:19852	gnl|BL_ORD_ID|0	100	150	0	0	80	229	896	38	80	229	150
A00456:223:HMMCCDSXX:3:2355:18864:25614	gnl|BL_ORD_ID|0	99.333	150	1	0	80	229	897	39	80	229	150
A00456:223:HMMCCDSXX:3:2365:20844:15421	gnl|BL_ORD_ID|0	100	150	0	0	80	229	898	40	80	229	150
A00456:223:HMMCCDSXX:3:2374:22327:12696	gnl|BL_ORD_ID|0	100	150	0	0	80	229	899	41	80	229	150
A00456:223:HMMCCDSXX:3:2568:28330:13291	gnl|BL_ORD_ID|0	100	150	0	0	80	229	900	42	80	229	150
A00456:223:HMMCCDSXX:3:2614:27561:28526	gnl|BL_ORD_ID|0	100	150	0	0	80	229	901	43	80	229	150
A00456:223:HMMCCDSXX:3:2616:6117:31501	gnl|BL_ORD_ID|0	100	150	0	0	80	229	902	44	80	229	150
A00456:223:HMMCCDSXX:3:2626:4887:2284	gnl|BL_ORD_ID|0	100	150	0	0	80	229	903	45	80	229	150
A00456:223:HMMCCDSXX:3:2631:9598:36777	gnl|BL_ORD_ID|0	100	150	0	0	80	229	904	46	80	229	150
A00456:223:HMMCCDSXX:3:2662:8097:29794	gnl|BL_ORD_ID|0	100	150	0	0	80	229	905	47	80	229	150
A00456:223:HMMCCDSXX:3:2663:18945:35869	gnl|BL_ORD_ID|0	100	150	0	0	80	229	906	48	80	229	150
A00456:223:HMMCCDSXX:3:2663:18819:35806	gnl|BL_ORD_ID|0	100	150	0	0	80	229	907	49	80	229	150
A00456:223:HMMCCDSXX:3:2672:11623:33739	gnl|BL_ORD_ID|0	100	150	0	0	80	229	908	50	80	229	150
A00456:223:HMMCCDSXX:3:1315:22083:33505	gnl|BL_ORD_ID|0	100	150	0	0	80	229	909	51	80	229	150
A00456:223:HMMCCDSXX:3:1325:3658:11459	gnl|BL_ORD_ID|0	100	150	0	0	80	229	910	52	80	229	150
A00456:223:HMMCCDSXX:3:1341:3992:7498	gnl|BL_ORD_ID|0	100	150	0	0	80	229	911	53	80	229	150
A00456:223:HMMCCDSXX:3:1341:11080:9345	gnl|BL_ORD_ID|0	100	150	0	0	80	229	912	54	80	229	150
A00456:223:HMMCCDSXX:3:1349:9489:10535	gnl|BL_ORD_ID|0	100	150	0	0	80	229	913	55	80	229	150
A00456:223:HMMCCDSXX:3:1458:28763:29951	gnl|BL_ORD_ID|0	100	150	0	0	80	229	914	56	80	229	150
A00456:223:HMMCCDSXX:3:1531:30382:24580	gnl|BL_ORD_ID|0	100	150	0	0	80	229	915	57	80	229	150
A00456:223:HMMCCDSXX:3:1563:8820:18771	gnl|BL_ORD_ID|0	100	150	0	0	80	229	916	58	80	229	150
A00456:223:HMMCCDSXX:3:1631:7111:12868	gnl|BL_ORD_ID|0	99.333	150	1	0	80	229	917	59	80	229	150
A00456:223:HMMCCDSXX:3:1656:8766:29450	gnl|BL_ORD_ID|0	99.333	150	1	0	80	229	918	60	80	229	150
A00456:223:HMMCCDSXX:3:1658:13928:21762	gnl|BL_ORD_ID|0	100	150	0	0	80	229	919	61	80	229	150
A00456:223:HMMCCDSXX:3:1675:20410:18364	gnl|BL_ORD_ID|0	100	150	0	0	80	229	920	62	80	229	150
A00456:223:HMMCCDSXX:3:1676:6542:10128	gnl|BL_ORD_ID|0	100	150	0	0	80	229	921	63	80	229	150
A00456:223:HMMCCDSXX:3:2132:9299:1908	gnl|BL_ORD_ID|0	100	150	0	0	80	229	922	64	80	229	150
A00456:223:HMMCCDSXX:3:2132:8883:2127	gnl|BL_ORD_ID|0	100	150	0	0	80	229	923	65	80	229	150
A00456:223:HMMCCDSXX:3:2336:32199:31172	gnl|BL_ORD_ID|0	100	150	0	0	80	229	924	66	80	229	150
A00456:223:HMMCCDSXX:3:2338:26512:17315	gnl|BL_ORD_ID|0	100	150	0	0	80	229	925	67	80	229	150
A00456:223:HMMCCDSXX:3:2348:28863:29277	gnl|BL_ORD_ID|0	100	150	0	0	80	229	926	68	80	229	150
A00456:223:HMMCCDSXX:3:2422:18647:26710	gnl|BL_ORD_ID|0	100	150	0	0	80	229	927	69	80	229	150
A00456:223:HMMCCDSXX:3:2429:12680:10207	gnl|BL_ORD_ID|0	98	150	3	0	80	229	928	70	80	229	150
A00456:223:HMMCCDSXX:3:2449:15266:5008	gnl|BL_ORD_ID|0	100	150	0	0	80	229	929	71	80	229	150
A00456:223:HMMCCDSXX:3:2528:20537:9909	gnl|BL_ORD_ID|0	100	150	0	0	80	229	930	72	80	229	150
A00456:223:HMMCCDSXX:3:2528:19578:10567	gnl|BL_ORD_ID|0	100	150	0	0	80	229	931	73	80	229	150
A00456:223:HMMCCDSXX:3:2545:2953:17848	gnl|BL_ORD_ID|0	100	150	0	0	80	229	932	74	80	229	150
A00456:223:HMMCCDSXX:3:1138:1886:9048	gnl|BL_ORD_ID|0	100	150	0	0	81	230	933	1	81	230	150
A00456:223:HMMCCDSXX:3:1203:4869:29403	gnl|BL_ORD_ID|0	100	150	0	0	81	230	934	2	81	230	150
A00456:223:HMMCCDSXX:3:1203:4481:30545	gnl|BL_ORD_ID|0	100	150	0	0	81	230	935	3	81	230	150
A00456:223:HMMCCDSXX:3:1207:29496:24674	gnl|BL_ORD_ID|0	100	150	0	0	81	230	936	4	81	230	150
A00456:223:HMMCCDSXX:3:1277:7401:14403	gnl|BL_ORD_ID|0	99.333	150	1	0	81	230	937	5	81	230	150
A00456:223:HMMCCDSXX:3:1305:24758:2284	gnl|BL_ORD_ID|0	100	150	0	0	81	230	938	6	81	230	150
A00456:223:HMMCCDSXX:3:1347:4309:8422	gnl|BL_ORD_ID|0	100	150	0	0	81	230	939	7	81	230	150
A00456:223:HMMCCDSXX:3:1524:8241:29387	gnl|BL_ORD_ID|0	100	150	0	0	81	230	940	8	81	230	150
A00456:223:HMMCCDSXX:3:1554:17155:34397	gnl|BL_ORD_ID|0	100	150	0	0	81	230	941	9	81	230	150
A00456:223:HMMCCDSXX:3:1578:10411:21120	gnl|BL_ORD_ID|0	100	150	0	0	81	230	942	10	81	230	150
A00456:223:HMMCCDSXX:3:1627:4580:23610	gnl|BL_ORD_ID|0	100	150	0	0	81	230	943	11	81	230	150
A00456:223:HMMCCDSXX:3:1635:5457:20087	gnl|BL_ORD_ID|0	100	150	0	0	81	230	944	12	81	230	150
A00456:223:HMMCCDSXX:3:1635:2239:26412	gnl|BL_ORD_ID|0	100	150	0	0	81	230	945	13	81	230	150
A00456:223:HMMCCDSXX:3:1639:12174:19194	gnl|BL_ORD_ID|0	100	150	0	0	81	230	946	14	81	230	150
A00456:223:HMMCCDSXX:3:2206:29595:19053	gnl|BL_ORD_ID|0	99.333	150	1	0	81	230	947	15	81	230	150
A00456:223:HMMCCDSXX:3:2208:6940:23281	gnl|BL_ORD_ID|0	99.333	150	1	0	81	230	948	16	81	230	150
A00456:223:HMMCCDSXX:3:2212:31512:8281	gnl|BL_ORD_ID|0	99.333	150	1	0	81	230	949	17	81	230	150
A00456:223:HMMCCDSXX:3:2316:10484:15170	gnl|BL_ORD_ID|0	100	150	0	0	81	230	950	18	81	230	150
A00456:223:HMMCCDSXX:3:2323:4164:24455	gnl|BL_ORD_ID|0	99.333	150	1	0	81	230	951	19	81	230	150
A00456:223:HMMCCDSXX:3:2333:14389:32925	gnl|BL_ORD_ID|0	100	150	0	0	81	230	952	20	81	230	150
A00456:223:HMMCCDSXX:3:2352:27787:19398	gnl|BL_ORD_ID|0	100	150	0	0	81	230	953	21	81	230	150
A00456:223:HMMCCDSXX:3:2657:12997:8406	gnl|BL_ORD_ID|0	100	150	0	0	81	230	954	22	81	230	150
A00456:223:HMMCCDSXX:3:2673:2935:36761	gnl|BL_ORD_ID|0	100	150	0	0	81	230	955	23	81	230	150
A00456:223:HMMCCDSXX:3:1110:24867:14309	gnl|BL_ORD_ID|0	100	150	0	0	81	230	956	24	81	230	150
A00456:223:HMMCCDSXX:3:1125:9851:12947	gnl|BL_ORD_ID|0	100	150	0	0	81	230	957	25	81	230	150
A00456:223:HMMCCDSXX:3:1125:9100:13651	gnl|BL_ORD_ID|0	100	150	0	0	81	230	958	26	81	230	150
A00456:223:HMMCCDSXX:3:1141:27814:36980	gnl|BL_ORD_ID|0	100	150	0	0	81	230	959	27	81	230	150
A00456:223:HMMCCDSXX:3:1176:21215:9142	gnl|BL_ORD_ID|0	100	150	0	0	81	230	960	28	81	230	150
A00456:223:HMMCCDSXX:3:1176:21323:9267	gnl|BL_ORD_ID|0	100	150	0	0	81	230	961	29	81	230	150
A00456:223:HMMCCDSXX:3:1224:14796:26835	gnl|BL_ORD_ID|0	100	150	0	0	81	230	962	30	81	230	150
A00456:223:HMMCCDSXX:3:1258:11134:17675	gnl|BL_ORD_ID|0	100	150	0	0	81	230	963	31	81	230	150
A00456:223:HMMCCDSXX:3:1413:15564:30452	gnl|BL_ORD_ID|0	99.333	150	1	0	81	230	964	32	81	230	150
A00456:223:HMMCCDSXX:3:1469:21287:34256	gnl|BL_ORD_ID|0	100	150	0	0	81	230	965	33	81	230	150
A00456:223:HMMCCDSXX:3:1652:8504:34162	gnl|BL_ORD_ID|0	100	150	0	0	81	230	966	34	81	230	150
A00456:223:HMMCCDSXX:3:2130:28022:17519	gnl|BL_ORD_ID|0	99.333	150	1	0	81	230	967	35	81	230	150
A00456:223:HMMCCDSXX:3:2178:31467:24549	gnl|BL_ORD_ID|0	100	150	0	0	81	230	968	36	81	230	150
A00456:223:HMMCCDSXX:3:2205:6732:9267	gnl|BL_ORD_ID|0	100	150	0	0	81	230	969	37	81	230	150
A00456:223:HMMCCDSXX:3:2254:11035:15342	gnl|BL_ORD_ID|0	100	150	0	0	81	230	970	38	81	230	150
A00456:223:HMMCCDSXX:3:2260:17390:16266	gnl|BL_ORD_ID|0	100	150	0	0	81	230	971	39	81	230	150
A00456:223:HMMCCDSXX:3:2344:14244:24940	gnl|BL_ORD_ID|0	100	150	0	0	81	230	972	40	81	230	150
A00456:223:HMMCCDSXX:3:2361:32036:35336	gnl|BL_ORD_ID|0	100	150	0	0	81	230	973	41	81	230	150
A00456:223:HMMCCDSXX:3:2361:32136:35728	gnl|BL_ORD_ID|0	100	150	0	0	81	230	974	42	81	230	150
A00456:223:HMMCCDSXX:3:2372:15411:17440	gnl|BL_ORD_ID|0	100	150	0	0	81	230	975	43	81	230	150
A00456:223:HMMCCDSXX:3:2470:21025:10848	gnl|BL_ORD_ID|0	100	150	0	0	81	230	976	44	81	230	150
A00456:223:HMMCCDSXX:3:2506:11071:2879	gnl|BL_ORD_ID|0	99.333	150	1	0	81	230	977	45	81	230	150
A00456:223:HMMCCDSXX:3:2560:8956:3818	gnl|BL_ORD_ID|0	100	150	0	0	81	230	978	46	81	230	150
A00456:223:HMMCCDSXX:3:2669:14181:5885	gnl|BL_ORD_ID|0	100	150	0	0	81	230	979	47	81	230	150
A00456:223:HMMCCDSXX:3:1325:1099:13636	gnl|BL_ORD_ID|0	100	148	0	0	81	228	980	48	81	228	148
A00456:223:HMMCCDSXX:3:1325:1154:13730	gnl|BL_ORD_ID|0	98.649	148	2	0	81	228	981	49	81	228	148
A00456:223:HMMCCDSXX:3:1355:4291:30624	gnl|BL_ORD_ID|0	100	150	0	0	81	230	982	50	81	230	150
A00456:223:HMMCCDSXX:3:2657:17336:14168	gnl|BL_ORD_ID|0	99.333	150	1	0	81	230	983	51	81	230	150
A00456:223:HMMCCDSXX:3:1263:5231:6010	gnl|BL_ORD_ID|0	100	150	0	0	81	230	984	52	81	230	150
A00456:223:HMMCCDSXX:3:1412:26657:23234	gnl|BL_ORD_ID|0	100	150	0	0	81	230	985	53	81	230	150
A00456:223:HMMCCDSXX:3:1544:31638:8656	gnl|BL_ORD_ID|0	100	150	0	0	81	230	986	54	81	230	150
A00456:223:HMMCCDSXX:3:1544:31006:10473	gnl|BL_ORD_ID|0	100	150	0	0	81	230	987	55	81	230	150
A00456:223:HMMCCDSXX:3:1639:12174:19194	gnl|BL_ORD_ID|0	100	150	0	0	81	230	988	56	81	230	150
A00456:223:HMMCCDSXX:3:2254:23484:18552	gnl|BL_ORD_ID|0	100	150	0	0	81	230	989	57	81	230	150
A00456:223:HMMCCDSXX:3:1133:18240:6308	gnl|BL_ORD_ID|0	99.338	151	1	1	81	231	990	58	81	231	151
A00456:223:HMMCCDSXX:3:2602:3414:5995	gnl|BL_ORD_ID|0	100	150	0	0	82	231	991	1	82	231	150
A00456:223:HMMCCDSXX:3:1243:28754:27649	gnl|BL_ORD_ID|0	100	150	0	0	82	231	992	2	82	231	150
A00456:223:HMMCCDSXX:3:1530:11071:1939	gnl|BL_ORD_ID|0	99.333	150	1	1	82	231	993	3	82	231	150
A00456:223:HMMCCDSXX:3:2543:28953:1752	gnl|BL_ORD_ID|0	100	150	0	0	82	231	994	4	82	231	150
A00456:223:HMMCCDSXX:3:2551:8838:14732	gnl|BL_ORD_ID|0	100	150	0	0	82	231	995	5	82	231	150
A00456:223:HMMCCDSXX:3:2228:28465:24486	gnl|BL_ORD_ID|0	100	149	0	0	82	230	996	6	82	230	149
A00456:223:HMMCCDSXX:3:1148:17173:7968	gnl|BL_ORD_ID|0	99.329	149	1	0	82	230	997	7	82	230	149
A00456:223:HMMCCDSXX:3:1148:17942:7827	gnl|BL_ORD_ID|0	100	149	0	0	82	230	998	8	82	230	149
A00456:223:HMMCCDSXX:3:1574:4987:13573	gnl|BL_ORD_ID|0	100	149	0	0	82	230	999	9	82	230	149
A00456:223:HMMCCDSXX:3:2609:18313:14857	gnl|BL_ORD_ID|0	99.329	149	1	0	82	230	1000	10	82	230	149
A00456:223:HMMCCDSXX:3:1402:30653:17159	gnl|BL_ORD_ID|0	99.333	150	1	1	82	230	1001	11	82	230	149
A00456:223:HMMCCDSXX:3:1402:31024:17080	gnl|BL_ORD_ID|0	99.333	150	1	1	82	230	1002	12	82	230	149
A00456:223:HMMCCDSXX:3:1258:20446:26537	gnl|BL_ORD_ID|0	100	150	0	0	82	231	1003	13	82	231	150
A00456:223:HMMCCDSXX:3:1406:16477:21480	gnl|BL_ORD_ID|0	99.333	150	1	0	82	231	1004	14	82	231	150
A00456:223:HMMCCDSXX:3:1406:18168:35211	gnl|BL_ORD_ID|0	99.333	150	1	0	82	231	1005	15	82	231	150
A00456:223:HMMCCDSXX:3:1621:20745:24518	gnl|BL_ORD_ID|0	99.333	150	1	0	82	231	1006	16	82	231	150
A00456:223:HMMCCDSXX:3:2322:31042:26537	gnl|BL_ORD_ID|0	100	150	0	0	82	231	1007	17	82	231	150
A00456:223:HMMCCDSXX:3:2537:9805:29309	gnl|BL_ORD_ID|0	100	150	0	0	82	231	1008	18	82	231	150
A00456:223:HMMCCDSXX:3:1301:24686:29684	gnl|BL_ORD_ID|0	99.333	150	1	0	82	231	1009	19	82	231	150
A00456:223:HMMCCDSXX:3:1315:12653:3897	gnl|BL_ORD_ID|0	100	150	0	0	82	231	1010	20	82	231	150
A00456:223:HMMCCDSXX:3:1322:17879:19961	gnl|BL_ORD_ID|0	96	150	6	0	82	231	1011	21	82	231	150
A00456:223:HMMCCDSXX:3:1353:15230:5822	gnl|BL_ORD_ID|0	99.333	150	1	0	82	231	1012	22	82	231	150
A00456:223:HMMCCDSXX:3:1417:13051:28385	gnl|BL_ORD_ID|0	99.333	150	1	0	82	231	1013	23	82	231	150
A00456:223:HMMCCDSXX:3:1433:20681:26663	gnl|BL_ORD_ID|0	100	150	0	0	82	231	1014	24	82	231	150
A00456:223:HMMCCDSXX:3:1445:2130:31485	gnl|BL_ORD_ID|0	100	150	0	0	82	231	1015	25	82	231	150
A00456:223:HMMCCDSXX:3:2218:21757:27179	gnl|BL_ORD_ID|0	100	150	0	0	82	231	1016	26	82	231	150
A00456:223:HMMCCDSXX:3:2537:9570:20384	gnl|BL_ORD_ID|0	100	150	0	0	82	231	1017	27	82	231	150
A00456:223:HMMCCDSXX:3:2648:6424:4288	gnl|BL_ORD_ID|0	100	150	0	0	82	231	1018	28	82	231	150
A00456:223:HMMCCDSXX:3:1176:2230:12211	gnl|BL_ORD_ID|0	100	150	0	0	83	232	1019	1	83	232	150
A00456:223:HMMCCDSXX:3:1176:1497:12665	gnl|BL_ORD_ID|0	100	150	0	0	83	232	1020	2	83	232	150
A00456:223:HMMCCDSXX:3:1206:29857:15374	gnl|BL_ORD_ID|0	100	150	0	0	83	232	1021	3	83	232	150
A00456:223:HMMCCDSXX:3:1217:22779:21026	gnl|BL_ORD_ID|0	100	150	0	0	83	232	1022	4	83	232	150
A00456:223:HMMCCDSXX:3:1230:5764:6370	gnl|BL_ORD_ID|0	100	150	0	0	83	232	1023	5	83	232	150
A00456:223:HMMCCDSXX:3:1314:23113:27837	gnl|BL_ORD_ID|0	100	150	0	0	83	232	1024	6	83	232	150
A00456:223:HMMCCDSXX:3:1349:9489:10535	gnl|BL_ORD_ID|0	100	150	0	0	83	232	1025	7	83	232	150
A00456:223:HMMCCDSXX:3:1425:19343:5776	gnl|BL_ORD_ID|0	99.333	150	1	0	83	232	1026	8	83	232	150
A00456:223:HMMCCDSXX:3:1440:7591:29168	gnl|BL_ORD_ID|0	100	150	0	0	83	232	1027	9	83	232	150
A00456:223:HMMCCDSXX:3:1453:11098:3803	gnl|BL_ORD_ID|0	100	150	0	0	83	232	1028	10	83	232	150
A00456:223:HMMCCDSXX:3:1457:30734:16767	gnl|BL_ORD_ID|0	100	150	0	0	83	232	1029	11	83	232	150
A00456:223:HMMCCDSXX:3:1457:29541:18364	gnl|BL_ORD_ID|0	100	150	0	0	83	232	1030	12	83	232	150
A00456:223:HMMCCDSXX:3:1520:5981:33614	gnl|BL_ORD_ID|0	100	150	0	0	83	232	1031	13	83	232	150
A00456:223:HMMCCDSXX:3:1541:22055:11068	gnl|BL_ORD_ID|0	99.333	150	1	0	83	232	1032	14	83	232	150
A00456:223:HMMCCDSXX:3:1546:18511:29418	gnl|BL_ORD_ID|0	100	150	0	0	83	232	1033	15	83	232	150
A00456:223:HMMCCDSXX:3:1569:30725:16282	gnl|BL_ORD_ID|0	100	150	0	0	83	232	1034	16	83	232	150
A00456:223:HMMCCDSXX:3:1575:13160:8938	gnl|BL_ORD_ID|0	100	150	0	0	83	232	1035	17	83	232	150
A00456:223:HMMCCDSXX:3:1657:9118:32189	gnl|BL_ORD_ID|0	100	150	0	0	83	232	1036	18	83	232	150
A00456:223:HMMCCDSXX:3:1673:20618:18818	gnl|BL_ORD_ID|0	100	150	0	0	83	232	1037	19	83	232	150
A00456:223:HMMCCDSXX:3:2130:9046:5228	gnl|BL_ORD_ID|0	100	150	0	0	83	232	1038	20	83	232	150
A00456:223:HMMCCDSXX:3:2138:10655:33035	gnl|BL_ORD_ID|0	100	150	0	0	83	232	1039	21	83	232	150
A00456:223:HMMCCDSXX:3:2246:24677:32957	gnl|BL_ORD_ID|0	100	150	0	0	83	232	1040	22	83	232	150
A00456:223:HMMCCDSXX:3:2250:26124:30545	gnl|BL_ORD_ID|0	99.333	150	1	0	83	232	1041	23	83	232	150
A00456:223:HMMCCDSXX:3:2252:7789:31955	gnl|BL_ORD_ID|0	100	150	0	0	83	232	1042	24	83	232	150
A00456:223:HMMCCDSXX:3:2255:31566:4773	gnl|BL_ORD_ID|0	100	150	0	0	83	232	1043	25	83	232	150
A00456:223:HMMCCDSXX:3:2277:30933:29575	gnl|BL_ORD_ID|0	100	150	0	0	83	232	1044	26	83	232	150
A00456:223:HMMCCDSXX:3:2337:30219:13056	gnl|BL_ORD_ID|0	100	150	0	0	83	232	1045	27	83	232	150
A00456:223:HMMCCDSXX:3:2360:22254:30326	gnl|BL_ORD_ID|0	99.333	150	1	0	83	232	1046	28	83	232	150
A00456:223:HMMCCDSXX:3:2427:5556:13307	gnl|BL_ORD_ID|0	96.667	150	5	0	83	232	1047	29	83	232	150
A00456:223:HMMCCDSXX:3:2452:19434:25848	gnl|BL_ORD_ID|0	100	150	0	0	83	232	1048	30	83	232	150
A00456:223:HMMCCDSXX:3:2477:18005:13041	gnl|BL_ORD_ID|0	100	150	0	0	83	232	1049	31	83	232	150
A00456:223:HMMCCDSXX:3:2504:19985:15499	gnl|BL_ORD_ID|0	100	150	0	0	83	232	1050	32	83	232	150
A00456:223:HMMCCDSXX:3:2605:27633:32471	gnl|BL_ORD_ID|0	100	150	0	0	83	232	1051	33	83	232	150
A00456:223:HMMCCDSXX:3:2669:24008:4492	gnl|BL_ORD_ID|0	100	150	0	0	83	232	1052	34	83	232	150
A00456:223:HMMCCDSXX:3:2675:11189:36777	gnl|BL_ORD_ID|0	100	150	0	0	83	232	1053	35	83	232	150
A00456:223:HMMCCDSXX:3:2678:31367:21621	gnl|BL_ORD_ID|0	99.333	150	1	0	83	232	1054	36	83	232	150
A00456:223:HMMCCDSXX:3:1104:26576:9314	gnl|BL_ORD_ID|0	100	150	0	0	83	232	1055	37	83	232	150
A00456:223:HMMCCDSXX:3:1105:19199:3834	gnl|BL_ORD_ID|0	100	150	0	0	83	232	1056	38	83	232	150
A00456:223:HMMCCDSXX:3:1124:13557:32643	gnl|BL_ORD_ID|0	100	150	0	0	83	232	1057	39	83	232	150
A00456:223:HMMCCDSXX:3:1139:19135:10019	gnl|BL_ORD_ID|0	100	150	0	0	83	232	1058	40	83	232	150
A00456:223:HMMCCDSXX:3:1151:23122:6308	gnl|BL_ORD_ID|0	100	150	0	0	83	232	1059	41	83	232	150
A00456:223:HMMCCDSXX:3:1167:23827:3020	gnl|BL_ORD_ID|0	100	150	0	0	83	232	1060	42	83	232	150
A00456:223:HMMCCDSXX:3:1174:10755:33614	gnl|BL_ORD_ID|0	100	150	0	0	83	232	1061	43	83	232	150
A00456:223:HMMCCDSXX:3:1245:8169:23657	gnl|BL_ORD_ID|0	98.667	150	2	0	83	232	1062	44	83	232	150
A00456:223:HMMCCDSXX:3:1245:8160:23641	gnl|BL_ORD_ID|0	98.667	150	2	0	83	232	1063	45	83	232	150
A00456:223:HMMCCDSXX:3:1245:2437:29356	gnl|BL_ORD_ID|0	100	150	0	0	83	232	1064	46	83	232	150
A00456:223:HMMCCDSXX:3:1262:10366:26991	gnl|BL_ORD_ID|0	100	150	0	0	83	232	1065	47	83	232	150
A00456:223:HMMCCDSXX:3:1312:9435:30076	gnl|BL_ORD_ID|0	100	150	0	0	83	232	1066	48	83	232	150
A00456:223:HMMCCDSXX:3:1335:23457:28181	gnl|BL_ORD_ID|0	100	150	0	0	83	232	1067	49	83	232	150
A00456:223:HMMCCDSXX:3:1338:15890:26913	gnl|BL_ORD_ID|0	100	150	0	0	83	232	1068	50	83	232	150
A00456:223:HMMCCDSXX:3:1363:21947:34115	gnl|BL_ORD_ID|0	100	150	0	0	83	232	1069	51	83	232	150
A00456:223:HMMCCDSXX:3:1365:13087:22060	gnl|BL_ORD_ID|0	100	150	0	0	83	232	1070	52	83	232	150
A00456:223:HMMCCDSXX:3:1402:10529:7106	gnl|BL_ORD_ID|0	100	150	0	0	83	232	1071	53	83	232	150
A00456:223:HMMCCDSXX:3:1402:10484:11036	gnl|BL_ORD_ID|0	100	150	0	0	83	232	1072	54	83	232	150
A00456:223:HMMCCDSXX:3:1435:25057:30702	gnl|BL_ORD_ID|0	100	150	0	0	83	232	1073	55	83	232	150
A00456:223:HMMCCDSXX:3:1435:24939:30968	gnl|BL_ORD_ID|0	100	150	0	0	83	232	1074	56	83	232	150
A00456:223:HMMCCDSXX:3:1456:32389:11240	gnl|BL_ORD_ID|0	100	150	0	0	83	232	1075	57	83	232	150
A00456:223:HMMCCDSXX:3:1456:3821:20259	gnl|BL_ORD_ID|0	100	150	0	0	83	232	1076	58	83	232	150
A00456:223:HMMCCDSXX:3:1471:30373:15796	gnl|BL_ORD_ID|0	100	150	0	0	83	232	1077	59	83	232	150
A00456:223:HMMCCDSXX:3:1476:18738:7576	gnl|BL_ORD_ID|0	99.333	150	1	0	83	232	1078	60	83	232	150
A00456:223:HMMCCDSXX:3:1504:30246:30295	gnl|BL_ORD_ID|0	100	150	0	0	83	232	1079	61	83	232	150
A00456:223:HMMCCDSXX:3:1517:17372:21183	gnl|BL_ORD_ID|0	100	150	0	0	83	232	1080	62	83	232	150
A00456:223:HMMCCDSXX:3:1517:15130:26287	gnl|BL_ORD_ID|0	100	150	0	0	83	232	1081	63	83	232	150
A00456:223:HMMCCDSXX:3:1517:15962:29857	gnl|BL_ORD_ID|0	100	150	0	0	83	232	1082	64	83	232	150
A00456:223:HMMCCDSXX:3:1529:31186:29763	gnl|BL_ORD_ID|0	100	150	0	0	83	232	1083	65	83	232	150
A00456:223:HMMCCDSXX:3:1531:24288:9893	gnl|BL_ORD_ID|0	100	150	0	0	83	232	1084	66	83	232	150
A00456:223:HMMCCDSXX:3:1545:5195:26365	gnl|BL_ORD_ID|0	100	150	0	0	83	232	1085	67	83	232	150
A00456:223:HMMCCDSXX:3:1557:17589:16736	gnl|BL_ORD_ID|0	100	150	0	0	83	232	1086	68	83	232	150
A00456:223:HMMCCDSXX:3:1621:20745:24518	gnl|BL_ORD_ID|0	99.333	150	1	0	83	232	1087	69	83	232	150
A00456:223:HMMCCDSXX:3:1627:24867:2378	gnl|BL_ORD_ID|0	100	150	0	0	83	232	1088	70	83	232	150
A00456:223:HMMCCDSXX:3:1631:26811:29011	gnl|BL_ORD_ID|0	100	150	0	0	83	232	1089	71	83	232	150
A00456:223:HMMCCDSXX:3:1636:21124:5760	gnl|BL_ORD_ID|0	100	150	0	0	83	232	1090	72	83	232	150
A00456:223:HMMCCDSXX:3:1649:26078:32659	gnl|BL_ORD_ID|0	100	150	0	0	83	232	1091	73	83	232	150
A00456:223:HMMCCDSXX:3:2138:32633:24471	gnl|BL_ORD_ID|0	99.333	150	1	0	83	232	1092	74	83	232	150
A00456:223:HMMCCDSXX:3:2153:22281:1877	gnl|BL_ORD_ID|0	100	150	0	0	83	232	1093	75	83	232	150
A00456:223:HMMCCDSXX:3:2171:13548:21230	gnl|BL_ORD_ID|0	100	150	0	0	83	232	1094	76	83	232	150
A00456:223:HMMCCDSXX:3:2228:26467:27320	gnl|BL_ORD_ID|0	98.667	150	2	0	83	232	1095	77	83	232	150
A00456:223:HMMCCDSXX:3:2256:32696:9204	gnl|BL_ORD_ID|0	100	150	0	0	83	232	1096	78	83	232	150
A00456:223:HMMCCDSXX:3:2309:13205:13150	gnl|BL_ORD_ID|0	99.333	150	1	0	83	232	1097	79	83	232	150
A00456:223:HMMCCDSXX:3:2408:31928:25848	gnl|BL_ORD_ID|0	100	150	0	0	83	232	1098	80	83	232	150
A00456:223:HMMCCDSXX:3:2412:27434:21073	gnl|BL_ORD_ID|0	100	150	0	0	83	232	1099	81	83	232	150
A00456:223:HMMCCDSXX:3:2421:8522:19100	gnl|BL_ORD_ID|0	100	150	0	0	83	232	1100	82	83	232	150
A00456:223:HMMCCDSXX:3:2440:24270:24518	gnl|BL_ORD_ID|0	98.667	150	2	0	83	232	1101	83	83	232	150
A00456:223:HMMCCDSXX:3:2462:6470:15640	gnl|BL_ORD_ID|0	100	150	0	0	83	232	1102	84	83	232	150
A00456:223:HMMCCDSXX:3:2550:32108:36902	gnl|BL_ORD_ID|0	100	150	0	0	83	232	1103	85	83	232	150
A00456:223:HMMCCDSXX:3:2557:17372:11287	gnl|BL_ORD_ID|0	100	150	0	0	83	232	1104	86	83	232	150
A00456:223:HMMCCDSXX:3:2568:28330:13291	gnl|BL_ORD_ID|0	100	150	0	0	83	232	1105	87	83	232	150
A00456:223:HMMCCDSXX:3:2573:30183:21418	gnl|BL_ORD_ID|0	100	150	0	0	83	232	1106	88	83	232	150
A00456:223:HMMCCDSXX:3:2607:12915:29089	gnl|BL_ORD_ID|0	100	150	0	0	83	232	1107	89	83	232	150
A00456:223:HMMCCDSXX:3:2613:28357:18223	gnl|BL_ORD_ID|0	100	150	0	0	83	232	1108	90	83	232	150
A00456:223:HMMCCDSXX:3:2668:4734:16705	gnl|BL_ORD_ID|0	100	150	0	0	83	232	1109	91	83	232	150
A00456:223:HMMCCDSXX:3:2210:31548:31297	gnl|BL_ORD_ID|0	100	149	0	0	83	231	1110	92	83	231	149
A00456:223:HMMCCDSXX:3:2460:1615:31626	gnl|BL_ORD_ID|0	100	149	0	0	83	231	1111	93	83	231	149
A00456:223:HMMCCDSXX:3:1363:18267:23703	gnl|BL_ORD_ID|0	100	149	0	0	83	231	1112	94	83	231	149
A00456:223:HMMCCDSXX:3:1403:30346:3630	gnl|BL_ORD_ID|0	100	149	0	0	83	231	1113	95	83	231	149
A00456:223:HMMCCDSXX:3:2551:31105:1125	gnl|BL_ORD_ID|0	100	149	0	0	83	231	1114	96	83	231	149
A00456:223:HMMCCDSXX:3:1430:26666:24659	gnl|BL_ORD_ID|0	99.333	150	1	0	84	233	1115	1	84	233	150
A00456:223:HMMCCDSXX:3:1465:25301:6324	gnl|BL_ORD_ID|0	100	150	0	0	84	233	1116	2	84	233	150
A00456:223:HMMCCDSXX:3:2454:13259:32659	gnl|BL_ORD_ID|0	100	150	0	0	84	233	1117	3	84	233	150
A00456:223:HMMCCDSXX:3:1430:30382:26240	gnl|BL_ORD_ID|0	99.333	150	1	0	84	233	1118	4	84	233	150
A00456:223:HMMCCDSXX:3:1602:20627:8938	gnl|BL_ORD_ID|0	100	150	0	0	84	233	1119	5	84	233	150
A00456:223:HMMCCDSXX:3:1673:8775:11553	gnl|BL_ORD_ID|0	100	150	0	0	84	233	1120	6	84	233	150
A00456:223:HMMCCDSXX:3:2474:27914:25911	gnl|BL_ORD_ID|0	97.987	149	3	0	84	232	1121	7	84	232	149
A00456:223:HMMCCDSXX:3:2518:28203:18082	gnl|BL_ORD_ID|0	100	149	0	0	84	232	1122	8	84	232	149
A00456:223:HMMCCDSXX:3:2616:6117:31501	gnl|BL_ORD_ID|0	100	149	0	0	84	232	1123	9	84	232	149
A00456:223:HMMCCDSXX:3:1622:4255:32002	gnl|BL_ORD_ID|0	100	148	0	0	84	231	1124	10	84	231	148
A00456:223:HMMCCDSXX:3:1525:25753:16376	gnl|BL_ORD_ID|0	100	150	0	0	84	233	1125	11	84	233	150
A00456:223:HMMCCDSXX:3:1628:6795:18803	gnl|BL_ORD_ID|0	98.667	150	2	0	85	234	1126	1	85	234	150
A00456:223:HMMCCDSXX:3:1113:30083:7247	gnl|BL_ORD_ID|0	100	149	0	0	85	233	1127	2	85	233	149
A00456:223:HMMCCDSXX:3:1162:1280:32581	gnl|BL_ORD_ID|0	100	147	0	0	85	231	1128	3	85	231	147
A00456:223:HMMCCDSXX:3:1114:24587:32299	gnl|BL_ORD_ID|0	100	150	0	0	85	234	1129	4	85	234	150
A00456:223:HMMCCDSXX:3:1127:21197:35383	gnl|BL_ORD_ID|0	100	150	0	0	85	234	1130	5	85	234	150
A00456:223:HMMCCDSXX:3:1275:27561:18349	gnl|BL_ORD_ID|0	100	150	0	0	85	234	1131	6	85	234	150
A00456:223:HMMCCDSXX:3:1332:11107:7545	gnl|BL_ORD_ID|0	100	150	0	0	85	234	1132	7	85	234	150
A00456:223:HMMCCDSXX:3:1343:32362:34303	gnl|BL_ORD_ID|0	99.333	150	1	0	85	234	1133	8	85	234	150
A00456:223:HMMCCDSXX:3:1359:25961:3521	gnl|BL_ORD_ID|0	99.333	150	1	0	85	234	1134	9	85	234	150
A00456:223:HMMCCDSXX:3:1362:4399:34100	gnl|BL_ORD_ID|0	100	150	0	0	85	234	1135	10	85	234	150
A00456:223:HMMCCDSXX:3:1465:4969:17174	gnl|BL_ORD_ID|0	99.333	150	1	0	85	234	1136	11	85	234	150
A00456:223:HMMCCDSXX:3:1568:5728:35556	gnl|BL_ORD_ID|0	100	150	0	0	85	234	1137	12	85	234	150
A00456:223:HMMCCDSXX:3:1578:19271:2080	gnl|BL_ORD_ID|0	100	150	0	0	85	234	1138	13	85	234	150
A00456:223:HMMCCDSXX:3:1646:20808:22842	gnl|BL_ORD_ID|0	100	150	0	0	85	234	1139	14	85	234	150
A00456:223:HMMCCDSXX:3:1657:29405:4319	gnl|BL_ORD_ID|0	100	150	0	0	85	234	1140	15	85	234	150
A00456:223:HMMCCDSXX:3:2240:21395:20165	gnl|BL_ORD_ID|0	100	150	0	0	85	234	1141	16	85	234	150
A00456:223:HMMCCDSXX:3:2269:26015:25191	gnl|BL_ORD_ID|0	100	150	0	0	85	234	1142	17	85	234	150
A00456:223:HMMCCDSXX:3:2269:24813:25739	gnl|BL_ORD_ID|0	100	150	0	0	85	234	1143	18	85	234	150
A00456:223:HMMCCDSXX:3:2276:12680:34632	gnl|BL_ORD_ID|0	100	150	0	0	85	234	1144	19	85	234	150
A00456:223:HMMCCDSXX:3:2276:12897:34882	gnl|BL_ORD_ID|0	100	150	0	0	85	234	1145	20	85	234	150
A00456:223:HMMCCDSXX:3:2306:16794:5149	gnl|BL_ORD_ID|0	100	150	0	0	85	234	1146	21	85	234	150
A00456:223:HMMCCDSXX:3:2359:11225:4961	gnl|BL_ORD_ID|0	100	150	0	0	85	234	1147	22	85	234	150
A00456:223:HMMCCDSXX:3:2445:32127:33238	gnl|BL_ORD_ID|0	100	150	0	0	85	234	1148	23	85	234	150
A00456:223:HMMCCDSXX:3:2456:9552:17879	gnl|BL_ORD_ID|0	100	150	0	0	85	234	1149	24	85	234	150
A00456:223:HMMCCDSXX:3:2456:9941:18552	gnl|BL_ORD_ID|0	100	150	0	0	85	234	1150	25	85	234	150
A00456:223:HMMCCDSXX:3:2575:2944:26631	gnl|BL_ORD_ID|0	99.333	150	1	0	85	234	1151	26	85	234	150
A00456:223:HMMCCDSXX:3:1133:13593:1485	gnl|BL_ORD_ID|0	100	150	0	0	85	234	1152	27	85	234	150
A00456:223:HMMCCDSXX:3:1226:17427:7091	gnl|BL_ORD_ID|0	100	150	0	0	85	234	1153	28	85	234	150
A00456:223:HMMCCDSXX:3:1341:20464:14606	gnl|BL_ORD_ID|0	100	150	0	0	85	234	1154	29	85	234	150
A00456:223:HMMCCDSXX:3:1348:13376:11788	gnl|BL_ORD_ID|0	100	150	0	0	85	234	1155	30	85	234	150
A00456:223:HMMCCDSXX:3:1356:13774:35869	gnl|BL_ORD_ID|0	100	150	0	0	85	234	1156	31	85	234	150
A00456:223:HMMCCDSXX:3:1372:30617:6386	gnl|BL_ORD_ID|0	100	150	0	0	85	234	1157	32	85	234	150
A00456:223:HMMCCDSXX:3:1529:1199:2785	gnl|BL_ORD_ID|0	100	150	0	0	85	234	1158	33	85	234	150
A00456:223:HMMCCDSXX:3:1545:18059:7999	gnl|BL_ORD_ID|0	100	150	0	0	85	234	1159	34	85	234	150
A00456:223:HMMCCDSXX:3:1652:2682:27023	gnl|BL_ORD_ID|0	100	150	0	0	85	234	1160	35	85	234	150
A00456:223:HMMCCDSXX:3:1668:2609:28181	gnl|BL_ORD_ID|0	100	150	0	0	85	234	1161	36	85	234	150
A00456:223:HMMCCDSXX:3:2155:14064:8187	gnl|BL_ORD_ID|0	99.333	150	1	0	85	234	1162	37	85	234	150
A00456:223:HMMCCDSXX:3:2166:27950:26600	gnl|BL_ORD_ID|0	100	150	0	0	85	234	1163	38	85	234	150
A00456:223:HMMCCDSXX:3:2205:3007:29747	gnl|BL_ORD_ID|0	100	150	0	0	85	234	1164	39	85	234	150
A00456:223:HMMCCDSXX:3:2314:30581:9111	gnl|BL_ORD_ID|0	100	150	0	0	85	234	1165	40	85	234	150
A00456:223:HMMCCDSXX:3:2327:4472:34507	gnl|BL_ORD_ID|0	100	150	0	0	85	234	1166	41	85	234	150
A00456:223:HMMCCDSXX:3:2345:3287:17769	gnl|BL_ORD_ID|0	100	150	0	0	85	234	1167	42	85	234	150
A00456:223:HMMCCDSXX:3:2415:24749:31579	gnl|BL_ORD_ID|0	100	150	0	0	85	234	1168	43	85	234	150
A00456:223:HMMCCDSXX:3:2429:28366:27414	gnl|BL_ORD_ID|0	100	150	0	0	85	234	1169	44	85	234	150
A00456:223:HMMCCDSXX:3:2472:8458:26349	gnl|BL_ORD_ID|0	100	150	0	0	85	234	1170	45	85	234	150
A00456:223:HMMCCDSXX:3:2472:8196:26616	gnl|BL_ORD_ID|0	100	150	0	0	85	234	1171	46	85	234	150
A00456:223:HMMCCDSXX:3:2532:22489:34648	gnl|BL_ORD_ID|0	100	150	0	0	85	234	1172	47	85	234	150
A00456:223:HMMCCDSXX:3:2563:31973:4758	gnl|BL_ORD_ID|0	100	150	0	0	85	234	1173	48	85	234	150
A00456:223:HMMCCDSXX:3:2634:14380:11334	gnl|BL_ORD_ID|0	100	150	0	0	85	234	1174	49	85	234	150
A00456:223:HMMCCDSXX:3:2634:15139:13244	gnl|BL_ORD_ID|0	100	150	0	0	85	234	1175	50	85	234	150
A00456:223:HMMCCDSXX:3:2674:20726:4539	gnl|BL_ORD_ID|0	100	150	0	0	85	234	1176	51	85	234	150
A00456:223:HMMCCDSXX:3:1305:31882:5885	gnl|BL_ORD_ID|0	100	150	0	0	86	235	1177	1	86	235	150
A00456:223:HMMCCDSXX:3:1305:31259:25723	gnl|BL_ORD_ID|0	100	150	0	0	86	235	1178	2	86	235	150
A00456:223:HMMCCDSXX:3:1119:18909:6026	gnl|BL_ORD_ID|0	100	150	0	0	87	236	1179	1	87	236	150
A00456:223:HMMCCDSXX:3:1119:19651:8187	gnl|BL_ORD_ID|0	100	150	0	0	87	236	1180	2	87	236	150
A00456:223:HMMCCDSXX:3:1419:2492:1517	gnl|BL_ORD_ID|0	100	150	0	0	87	236	1181	3	87	236	150
A00456:223:HMMCCDSXX:3:2278:4490:3067	gnl|BL_ORD_ID|0	100	150	0	0	87	236	1182	4	87	236	150
A00456:223:HMMCCDSXX:3:1229:8413:13088	gnl|BL_ORD_ID|0	100	150	0	0	87	236	1183	5	87	236	150
A00456:223:HMMCCDSXX:3:2430:1307:5572	gnl|BL_ORD_ID|0	99.324	148	1	0	87	234	1184	6	87	234	148
A00456:223:HMMCCDSXX:3:1116:1190:25942	gnl|BL_ORD_ID|0	100	150	0	0	88	237	1185	1	88	237	150
A00456:223:HMMCCDSXX:3:1246:26422:26866	gnl|BL_ORD_ID|0	100	150	0	0	88	237	1186	2	88	237	150
A00456:223:HMMCCDSXX:3:1435:17083:23030	gnl|BL_ORD_ID|0	98.667	150	2	0	88	237	1187	3	88	237	150
A00456:223:HMMCCDSXX:3:1568:4327:33880	gnl|BL_ORD_ID|0	100	150	0	0	88	237	1188	4	88	237	150
A00456:223:HMMCCDSXX:3:1656:8766:29450	gnl|BL_ORD_ID|0	99.333	150	1	0	88	237	1189	5	88	237	150
A00456:223:HMMCCDSXX:3:2435:25174:34601	gnl|BL_ORD_ID|0	100	150	0	0	88	237	1190	6	88	237	150
A00456:223:HMMCCDSXX:3:1167:20826:30107	gnl|BL_ORD_ID|0	100	150	0	0	88	237	1191	7	88	237	150
A00456:223:HMMCCDSXX:3:1357:29505:24439	gnl|BL_ORD_ID|0	100	150	0	0	88	237	1192	8	88	237	150
A00456:223:HMMCCDSXX:3:1442:10502:17331	gnl|BL_ORD_ID|0	100	150	0	0	88	237	1193	9	88	237	150
A00456:223:HMMCCDSXX:3:2363:3378:1799	gnl|BL_ORD_ID|0	100	150	0	0	88	237	1194	10	88	237	150
A00456:223:HMMCCDSXX:3:2609:18123:18537	gnl|BL_ORD_ID|0	100	150	0	0	88	237	1195	11	88	237	150
A00456:223:HMMCCDSXX:3:1117:26377:16705	gnl|BL_ORD_ID|0	100	149	0	0	88	236	1196	12	88	236	149
A00456:223:HMMCCDSXX:3:1122:13512:35884	gnl|BL_ORD_ID|0	99.329	149	1	0	88	236	1197	13	88	236	149
A00456:223:HMMCCDSXX:3:1573:27073:34538	gnl|BL_ORD_ID|0	100	149	0	0	88	236	1198	14	88	236	149
A00456:223:HMMCCDSXX:3:2573:25437:16329	gnl|BL_ORD_ID|0	100	149	0	0	88	236	1199	15	88	236	149
A00456:223:HMMCCDSXX:3:1425:32615:4805	gnl|BL_ORD_ID|0	100	150	0	0	89	238	1200	1	89	238	150
A00456:223:HMMCCDSXX:3:1320:7762:4664	gnl|BL_ORD_ID|0	100	148	0	0	89	236	1201	2	89	236	148
A00456:223:HMMCCDSXX:3:2575:2944:26631	gnl|BL_ORD_ID|0	100	148	0	0	89	236	1202	3	89	236	148
A00456:223:HMMCCDSXX:3:2212:25925:8938	gnl|BL_ORD_ID|0	100	148	0	0	89	236	1203	4	89	236	148
A00456:223:HMMCCDSXX:3:1178:18647:7827	gnl|BL_ORD_ID|0	99.333	150	1	0	89	238	1204	5	89	238	150
A00456:223:HMMCCDSXX:3:1352:11541:3004	gnl|BL_ORD_ID|0	100	150	0	0	89	238	1205	6	89	238	150
A00456:223:HMMCCDSXX:3:1434:9760:11631	gnl|BL_ORD_ID|0	100	150	0	0	89	238	1206	7	89	238	150
A00456:223:HMMCCDSXX:3:1453:11614:3192	gnl|BL_ORD_ID|0	100	150	0	0	89	238	1207	8	89	238	150
A00456:223:HMMCCDSXX:3:1458:32515:13338	gnl|BL_ORD_ID|0	100	150	0	0	89	238	1208	9	89	238	150
A00456:223:HMMCCDSXX:3:1539:2654:9251	gnl|BL_ORD_ID|0	100	150	0	0	89	238	1209	10	89	238	150
A00456:223:HMMCCDSXX:3:1571:26494:21793	gnl|BL_ORD_ID|0	100	150	0	0	89	238	1210	11	89	238	150
A00456:223:HMMCCDSXX:3:1616:27208:36526	gnl|BL_ORD_ID|0	100	150	0	0	89	238	1211	12	89	238	150
A00456:223:HMMCCDSXX:3:2204:8540:31250	gnl|BL_ORD_ID|0	100	150	0	0	89	238	1212	13	89	238	150
A00456:223:HMMCCDSXX:3:2368:28221:8813	gnl|BL_ORD_ID|0	99.333	150	1	0	89	238	1213	14	89	238	150
A00456:223:HMMCCDSXX:3:1169:31268:3662	gnl|BL_ORD_ID|0	100	150	0	0	89	238	1214	15	89	238	150
A00456:223:HMMCCDSXX:3:1237:28592:22451	gnl|BL_ORD_ID|0	99.333	150	1	0	89	238	1215	16	89	238	150
A00456:223:HMMCCDSXX:3:1469:32416:13667	gnl|BL_ORD_ID|0	99.333	150	1	0	89	238	1216	17	89	238	150
A00456:223:HMMCCDSXX:3:1653:8612:17190	gnl|BL_ORD_ID|0	100	150	0	0	89	238	1217	18	89	238	150
A00456:223:HMMCCDSXX:3:2345:17915:16642	gnl|BL_ORD_ID|0	100	150	0	0	89	238	1218	19	89	238	150
A00456:223:HMMCCDSXX:3:2549:17228:11381	gnl|BL_ORD_ID|0	100	150	0	0	89	238	1219	20	89	238	150
A00456:223:HMMCCDSXX:3:2661:7437:34695	gnl|BL_ORD_ID|0	99.333	150	1	0	89	238	1220	21	89	238	150
A00456:223:HMMCCDSXX:3:1278:20202:19069	gnl|BL_ORD_ID|0	99.338	151	1	1	90	240	1221	1	90	240	151
A00456:223:HMMCCDSXX:3:2170:6705:15483	gnl|BL_ORD_ID|0	99.338	151	1	1	90	240	1222	2	90	240	151
A00456:223:HMMCCDSXX:3:2212:25925:8938	gnl|BL_ORD_ID|0	99.338	151	1	1	90	240	1223	3	90	240	151
A00456:223:HMMCCDSXX:3:2447:7355:36119	gnl|BL_ORD_ID|0	99.338	151	1	1	90	240	1224	4	90	240	151
A00456:223:HMMCCDSXX:3:2507:24876:31986	gnl|BL_ORD_ID|0	99.338	151	1	1	90	240	1225	5	90	240	151
A00456:223:HMMCCDSXX:3:2274:22643:1595	gnl|BL_ORD_ID|0	99.338	151	1	1	90	240	1226	6	90	240	151
A00456:223:HMMCCDSXX:3:2365:20844:15421	gnl|BL_ORD_ID|0	99.338	151	1	1	90	240	1227	7	90	240	151
A00456:223:HMMCCDSXX:3:1164:6171:9518	gnl|BL_ORD_ID|0	100	150	0	0	90	239	1228	8	90	239	150
A00456:223:HMMCCDSXX:3:1238:12698:30718	gnl|BL_ORD_ID|0	100	150	0	0	90	239	1229	9	90	239	150
A00456:223:HMMCCDSXX:3:1244:5385:35618	gnl|BL_ORD_ID|0	100	150	0	0	90	239	1230	10	90	239	150
A00456:223:HMMCCDSXX:3:1244:4878:35587	gnl|BL_ORD_ID|0	100	150	0	0	90	239	1231	11	90	239	150
A00456:223:HMMCCDSXX:3:1276:27552:7780	gnl|BL_ORD_ID|0	100	150	0	0	90	239	1232	12	90	239	150
A00456:223:HMMCCDSXX:3:1315:22083:33505	gnl|BL_ORD_ID|0	100	150	0	0	90	239	1233	13	90	239	150
A00456:223:HMMCCDSXX:3:1432:30472:5040	gnl|BL_ORD_ID|0	99.333	150	1	0	90	239	1234	14	90	239	150
A00456:223:HMMCCDSXX:3:1478:17210:7059	gnl|BL_ORD_ID|0	100	150	0	0	90	239	1235	15	90	239	150
A00456:223:HMMCCDSXX:3:1501:32344:11005	gnl|BL_ORD_ID|0	100	150	0	0	90	239	1236	16	90	239	150
A00456:223:HMMCCDSXX:3:1503:22281:18881	gnl|BL_ORD_ID|0	100	150	0	0	90	239	1237	17	90	239	150
A00456:223:HMMCCDSXX:3:1505:7464:10567	gnl|BL_ORD_ID|0	100	150	0	0	90	239	1238	18	90	239	150
A00456:223:HMMCCDSXX:3:1531:10239:24643	gnl|BL_ORD_ID|0	100	150	0	0	90	239	1239	19	90	239	150
A00456:223:HMMCCDSXX:3:1534:4354:7529	gnl|BL_ORD_ID|0	100	150	0	0	90	239	1240	20	90	239	150
A00456:223:HMMCCDSXX:3:1536:29794:4116	gnl|BL_ORD_ID|0	100	150	0	0	90	239	1241	21	90	239	150
A00456:223:HMMCCDSXX:3:1646:15600:3302	gnl|BL_ORD_ID|0	100	150	0	0	90	239	1242	22	90	239	150
A00456:223:HMMCCDSXX:3:1658:13928:21762	gnl|BL_ORD_ID|0	100	150	0	0	90	239	1243	23	90	239	150
A00456:223:HMMCCDSXX:3:1663:10782:27524	gnl|BL_ORD_ID|0	100	150	0	0	90	239	1244	24	90	239	150
A00456:223:HMMCCDSXX:3:1675:20410:18364	gnl|BL_ORD_ID|0	98.667	150	2	0	90	239	1245	25	90	239	150
A00456:223:HMMCCDSXX:3:2105:17734:3270	gnl|BL_ORD_ID|0	100	150	0	0	90	239	1246	26	90	239	150
A00456:223:HMMCCDSXX:3:2124:1651:3067	gnl|BL_ORD_ID|0	100	150	0	0	90	239	1247	27	90	239	150
A00456:223:HMMCCDSXX:3:2125:11071:32158	gnl|BL_ORD_ID|0	100	150	0	0	90	239	1248	28	90	239	150
A00456:223:HMMCCDSXX:3:2131:4119:8594	gnl|BL_ORD_ID|0	100	150	0	0	90	239	1249	29	90	239	150
A00456:223:HMMCCDSXX:3:2131:25907:10629	gnl|BL_ORD_ID|0	99.333	150	1	0	90	239	1250	30	90	239	150
A00456:223:HMMCCDSXX:3:2131:12319:28682	gnl|BL_ORD_ID|0	100	150	0	0	90	239	1251	31	90	239	150
A00456:223:HMMCCDSXX:3:2161:3115:20791	gnl|BL_ORD_ID|0	100	150	0	0	90	239	1252	32	90	239	150
A00456:223:HMMCCDSXX:3:2226:5810:27524	gnl|BL_ORD_ID|0	100	150	0	0	90	239	1253	33	90	239	150
A00456:223:HMMCCDSXX:3:2241:31358:30405	gnl|BL_ORD_ID|0	100	150	0	0	90	239	1254	34	90	239	150
A00456:223:HMMCCDSXX:3:2302:28890:6089	gnl|BL_ORD_ID|0	100	150	0	0	90	239	1255	35	90	239	150
A00456:223:HMMCCDSXX:3:2347:16984:9799	gnl|BL_ORD_ID|0	100	150	0	0	90	239	1256	36	90	239	150
A00456:223:HMMCCDSXX:3:2349:27688:16438	gnl|BL_ORD_ID|0	100	150	0	0	90	239	1257	37	90	239	150
A00456:223:HMMCCDSXX:3:2370:10095:25645	gnl|BL_ORD_ID|0	100	150	0	0	90	239	1258	38	90	239	150
A00456:223:HMMCCDSXX:3:2429:20202:21699	gnl|BL_ORD_ID|0	100	150	0	0	90	239	1259	39	90	239	150
A00456:223:HMMCCDSXX:3:2449:15266:5008	gnl|BL_ORD_ID|0	100	150	0	0	90	239	1260	40	90	239	150
A00456:223:HMMCCDSXX:3:2469:18521:6887	gnl|BL_ORD_ID|0	100	150	0	0	90	239	1261	41	90	239	150
A00456:223:HMMCCDSXX:3:2518:25491:31986	gnl|BL_ORD_ID|0	100	150	0	0	90	239	1262	42	90	239	150
A00456:223:HMMCCDSXX:3:2602:23294:31281	gnl|BL_ORD_ID|0	100	150	0	0	90	239	1263	43	90	239	150
A00456:223:HMMCCDSXX:3:2614:24659:34710	gnl|BL_ORD_ID|0	100	150	0	0	90	239	1264	44	90	239	150
A00456:223:HMMCCDSXX:3:2645:9688:12947	gnl|BL_ORD_ID|0	98.667	150	2	0	90	239	1265	45	90	239	150
A00456:223:HMMCCDSXX:3:2662:32850:14732	gnl|BL_ORD_ID|0	100	150	0	0	90	239	1266	46	90	239	150
A00456:223:HMMCCDSXX:3:1101:6705:18740	gnl|BL_ORD_ID|0	95.333	150	7	0	90	239	1267	47	90	239	150
A00456:223:HMMCCDSXX:3:1127:27832:30029	gnl|BL_ORD_ID|0	100	150	0	0	90	239	1268	48	90	239	150
A00456:223:HMMCCDSXX:3:1171:31512:20024	gnl|BL_ORD_ID|0	100	150	0	0	90	239	1269	49	90	239	150
A00456:223:HMMCCDSXX:3:1202:17237:36072	gnl|BL_ORD_ID|0	100	150	0	0	90	239	1270	50	90	239	150
A00456:223:HMMCCDSXX:3:1241:28492:15671	gnl|BL_ORD_ID|0	100	150	0	0	90	239	1271	51	90	239	150
A00456:223:HMMCCDSXX:3:1247:16613:9157	gnl|BL_ORD_ID|0	100	150	0	0	90	239	1272	52	90	239	150
A00456:223:HMMCCDSXX:3:1262:28239:23437	gnl|BL_ORD_ID|0	100	150	0	0	90	239	1273	53	90	239	150
A00456:223:HMMCCDSXX:3:1348:4508:29340	gnl|BL_ORD_ID|0	100	150	0	0	90	239	1274	54	90	239	150
A00456:223:HMMCCDSXX:3:1352:11541:3004	gnl|BL_ORD_ID|0	100	150	0	0	90	239	1275	55	90	239	150
A00456:223:HMMCCDSXX:3:1363:27543:29684	gnl|BL_ORD_ID|0	100	150	0	0	90	239	1276	56	90	239	150
A00456:223:HMMCCDSXX:3:1369:17128:36573	gnl|BL_ORD_ID|0	100	150	0	0	90	239	1277	57	90	239	150
A00456:223:HMMCCDSXX:3:1465:31919:22795	gnl|BL_ORD_ID|0	100	150	0	0	90	239	1278	58	90	239	150
A00456:223:HMMCCDSXX:3:1469:9471:24126	gnl|BL_ORD_ID|0	100	150	0	0	90	239	1279	59	90	239	150
A00456:223:HMMCCDSXX:3:1469:9489:24126	gnl|BL_ORD_ID|0	100	150	0	0	90	239	1280	60	90	239	150
A00456:223:HMMCCDSXX:3:1477:2555:27430	gnl|BL_ORD_ID|0	100	150	0	0	90	239	1281	61	90	239	150
A00456:223:HMMCCDSXX:3:1519:2519:21919	gnl|BL_ORD_ID|0	100	150	0	0	90	239	1282	62	90	239	150
A00456:223:HMMCCDSXX:3:1539:10565:13119	gnl|BL_ORD_ID|0	100	150	0	0	90	239	1283	63	90	239	150
A00456:223:HMMCCDSXX:3:1650:9914:26303	gnl|BL_ORD_ID|0	100	150	0	0	90	239	1284	64	90	239	150
A00456:223:HMMCCDSXX:3:1653:3441:22013	gnl|BL_ORD_ID|0	100	150	0	0	90	239	1285	65	90	239	150
A00456:223:HMMCCDSXX:3:2124:2284:29778	gnl|BL_ORD_ID|0	100	150	0	0	90	239	1286	66	90	239	150
A00456:223:HMMCCDSXX:3:2168:22480:20603	gnl|BL_ORD_ID|0	100	150	0	0	90	239	1287	67	90	239	150
A00456:223:HMMCCDSXX:3:2311:3549:5071	gnl|BL_ORD_ID|0	100	150	0	0	90	239	1288	68	90	239	150
A00456:223:HMMCCDSXX:3:2323:14199:26897	gnl|BL_ORD_ID|0	100	150	0	0	90	239	1289	69	90	239	150
A00456:223:HMMCCDSXX:3:2353:28809:24236	gnl|BL_ORD_ID|0	100	150	0	0	90	239	1290	70	90	239	150
A00456:223:HMMCCDSXX:3:2356:8323:8359	gnl|BL_ORD_ID|0	100	150	0	0	90	239	1291	71	90	239	150
A00456:223:HMMCCDSXX:3:2358:7184:5259	gnl|BL_ORD_ID|0	100	150	0	0	90	239	1292	72	90	239	150
A00456:223:HMMCCDSXX:3:2446:12626:27837	gnl|BL_ORD_ID|0	100	150	0	0	90	239	1293	73	90	239	150
A00456:223:HMMCCDSXX:3:2513:23800:19820	gnl|BL_ORD_ID|0	100	150	0	0	90	239	1294	74	90	239	150
A00456:223:HMMCCDSXX:3:2517:8784:22060	gnl|BL_ORD_ID|0	100	150	0	0	90	239	1295	75	90	239	150
A00456:223:HMMCCDSXX:3:2517:8974:28181	gnl|BL_ORD_ID|0	96.667	150	5	0	90	239	1296	76	90	239	150
A00456:223:HMMCCDSXX:3:2548:18358:31375	gnl|BL_ORD_ID|0	100	150	0	0	90	239	1297	77	90	239	150
A00456:223:HMMCCDSXX:3:2561:3369:4257	gnl|BL_ORD_ID|0	100	150	0	0	90	239	1298	78	90	239	150
A00456:223:HMMCCDSXX:3:2604:3766:26772	gnl|BL_ORD_ID|0	100	150	0	0	90	239	1299	79	90	239	150
A00456:223:HMMCCDSXX:3:2635:18683:24017	gnl|BL_ORD_ID|0	100	150	0	0	90	239	1300	80	90	239	150
A00456:223:HMMCCDSXX:3:2672:18304:14403	gnl|BL_ORD_ID|0	99.333	150	1	0	90	239	1301	81	90	239	150
A00456:223:HMMCCDSXX:3:1444:6216:31328	gnl|BL_ORD_ID|0	100	147	0	0	90	236	1302	82	90	236	147
A00456:223:HMMCCDSXX:3:1444:6280:31657	gnl|BL_ORD_ID|0	100	147	0	0	90	236	1303	83	90	236	147
A00456:223:HMMCCDSXX:3:1444:6388:31626	gnl|BL_ORD_ID|0	100	147	0	0	90	236	1304	84	90	236	147
A00456:223:HMMCCDSXX:3:2560:2591:17942	gnl|BL_ORD_ID|0	100	147	0	0	90	236	1305	85	90	236	147
A00456:223:HMMCCDSXX:3:2560:2591:18035	gnl|BL_ORD_ID|0	100	147	0	0	90	236	1306	86	90	236	147
A00456:223:HMMCCDSXX:3:2359:11225:4961	gnl|BL_ORD_ID|0	97.241	145	4	0	90	234	1307	87	90	234	145
A00456:223:HMMCCDSXX:3:2640:25943:2362	gnl|BL_ORD_ID|0	100	150	0	0	90	239	1308	88	90	239	150
A00456:223:HMMCCDSXX:3:2412:10908:23641	gnl|BL_ORD_ID|0	99.338	151	1	1	91	241	1309	1	91	241	151
A00456:223:HMMCCDSXX:3:1267:2790:28682	gnl|BL_ORD_ID|0	99.333	150	1	0	91	240	1310	2	91	240	150
A00456:223:HMMCCDSXX:3:1348:13376:11788	gnl|BL_ORD_ID|0	100	150	0	0	91	240	1311	3	91	240	150
A00456:223:HMMCCDSXX:3:1411:8305:15562	gnl|BL_ORD_ID|0	100	150	0	0	91	240	1312	4	91	240	150
A00456:223:HMMCCDSXX:3:1425:27091:12273	gnl|BL_ORD_ID|0	100	150	0	0	91	240	1313	5	91	240	150
A00456:223:HMMCCDSXX:3:1427:13774:32456	gnl|BL_ORD_ID|0	100	150	0	0	91	240	1314	6	91	240	150
A00456:223:HMMCCDSXX:3:1433:20681:26663	gnl|BL_ORD_ID|0	100	150	0	0	91	240	1315	7	91	240	150
A00456:223:HMMCCDSXX:3:1505:1877:21151	gnl|BL_ORD_ID|0	100	150	0	0	91	240	1316	8	91	240	150
A00456:223:HMMCCDSXX:3:1529:4869:23015	gnl|BL_ORD_ID|0	100	150	0	0	91	240	1317	9	91	240	150
A00456:223:HMMCCDSXX:3:1544:31638:8656	gnl|BL_ORD_ID|0	100	150	0	0	91	240	1318	10	91	240	150
A00456:223:HMMCCDSXX:3:1544:31006:10473	gnl|BL_ORD_ID|0	100	150	0	0	91	240	1319	11	91	240	150
A00456:223:HMMCCDSXX:3:1656:19307:25003	gnl|BL_ORD_ID|0	100	150	0	0	91	240	1320	12	91	240	150
A00456:223:HMMCCDSXX:3:2166:27950:26600	gnl|BL_ORD_ID|0	100	150	0	0	91	240	1321	13	91	240	150
A00456:223:HMMCCDSXX:3:2210:30626:13322	gnl|BL_ORD_ID|0	100	150	0	0	91	240	1322	14	91	240	150
A00456:223:HMMCCDSXX:3:2210:30951:15013	gnl|BL_ORD_ID|0	100	150	0	0	91	240	1323	15	91	240	150
A00456:223:HMMCCDSXX:3:2254:23484:18552	gnl|BL_ORD_ID|0	100	150	0	0	91	240	1324	16	91	240	150
A00456:223:HMMCCDSXX:3:2304:18050:29309	gnl|BL_ORD_ID|0	100	150	0	0	91	240	1325	17	91	240	150
A00456:223:HMMCCDSXX:3:2336:32199:31172	gnl|BL_ORD_ID|0	100	150	0	0	91	240	1326	18	91	240	150
A00456:223:HMMCCDSXX:3:2345:28818:9251	gnl|BL_ORD_ID|0	100	150	0	0	91	240	1327	19	91	240	150
A00456:223:HMMCCDSXX:3:2359:29188:24706	gnl|BL_ORD_ID|0	100	150	0	0	91	240	1328	20	91	240	150
A00456:223:HMMCCDSXX:3:2444:29875:3568	gnl|BL_ORD_ID|0	100	150	0	0	91	240	1329	21	91	240	150
A00456:223:HMMCCDSXX:3:2653:25075:11224	gnl|BL_ORD_ID|0	100	150	0	0	91	240	1330	22	91	240	150
A00456:223:HMMCCDSXX:3:2669:10872:28369	gnl|BL_ORD_ID|0	100	150	0	0	91	240	1331	23	91	240	150
A00456:223:HMMCCDSXX:3:1158:20003:16063	gnl|BL_ORD_ID|0	99.333	150	1	0	91	240	1332	24	91	240	150
A00456:223:HMMCCDSXX:3:1258:20446:26537	gnl|BL_ORD_ID|0	100	150	0	0	91	240	1333	25	91	240	150
A00456:223:HMMCCDSXX:3:1265:4001:29559	gnl|BL_ORD_ID|0	100	150	0	0	91	240	1334	26	91	240	150
A00456:223:HMMCCDSXX:3:1274:25147:8406	gnl|BL_ORD_ID|0	100	150	0	0	91	240	1335	27	91	240	150
A00456:223:HMMCCDSXX:3:1354:4761:22232	gnl|BL_ORD_ID|0	100	150	0	0	91	240	1336	28	91	240	150
A00456:223:HMMCCDSXX:3:1369:29469:20838	gnl|BL_ORD_ID|0	100	150	0	0	91	240	1337	29	91	240	150
A00456:223:HMMCCDSXX:3:1403:25473:30859	gnl|BL_ORD_ID|0	100	150	0	0	91	240	1338	30	91	240	150
A00456:223:HMMCCDSXX:3:1404:30770:16391	gnl|BL_ORD_ID|0	100	150	0	0	91	240	1339	31	91	240	150
A00456:223:HMMCCDSXX:3:1438:29830:23312	gnl|BL_ORD_ID|0	100	150	0	0	91	240	1340	32	91	240	150
A00456:223:HMMCCDSXX:3:1616:27208:36526	gnl|BL_ORD_ID|0	100	150	0	0	91	240	1341	33	91	240	150
A00456:223:HMMCCDSXX:3:2107:18873:24158	gnl|BL_ORD_ID|0	100	150	0	0	91	240	1342	34	91	240	150
A00456:223:HMMCCDSXX:3:2252:3233:16830	gnl|BL_ORD_ID|0	100	150	0	0	91	240	1343	35	91	240	150
A00456:223:HMMCCDSXX:3:2261:22914:23422	gnl|BL_ORD_ID|0	100	150	0	0	91	240	1344	36	91	240	150
A00456:223:HMMCCDSXX:3:2405:15148:34460	gnl|BL_ORD_ID|0	100	150	0	0	91	240	1345	37	91	240	150
A00456:223:HMMCCDSXX:3:2527:18475:29888	gnl|BL_ORD_ID|0	100	150	0	0	91	240	1346	38	91	240	150
A00456:223:HMMCCDSXX:3:2527:17978:30185	gnl|BL_ORD_ID|0	100	150	0	0	91	240	1347	39	91	240	150
A00456:223:HMMCCDSXX:3:2631:9598:36777	gnl|BL_ORD_ID|0	100	150	0	0	91	240	1348	40	91	240	150
A00456:223:HMMCCDSXX:3:2659:6108:23281	gnl|BL_ORD_ID|0	99.333	150	1	0	91	240	1349	41	91	240	150
A00456:223:HMMCCDSXX:3:1402:30653:17159	gnl|BL_ORD_ID|0	99.333	150	1	1	91	239	1350	42	91	239	149
A00456:223:HMMCCDSXX:3:1402:31024:17080	gnl|BL_ORD_ID|0	99.333	150	1	1	91	239	1351	43	91	239	149
A00456:223:HMMCCDSXX:3:1110:13277:7607	gnl|BL_ORD_ID|0	100	149	0	0	91	239	1352	44	91	239	149
A00456:223:HMMCCDSXX:3:2614:26214:12821	gnl|BL_ORD_ID|0	100	150	0	0	91	240	1353	45	91	240	150
A00456:223:HMMCCDSXX:3:2654:17779:4852	gnl|BL_ORD_ID|0	100	150	0	0	91	240	1354	46	91	240	150
A00456:223:HMMCCDSXX:3:1158:2609:12900	gnl|BL_ORD_ID|0	100	150	0	0	91	240	1355	47	91	240	150
A00456:223:HMMCCDSXX:3:1161:9995:17237	gnl|BL_ORD_ID|0	100	150	0	0	91	240	1356	48	91	240	150
A00456:223:HMMCCDSXX:3:1432:17228:3771	gnl|BL_ORD_ID|0	100	150	0	0	91	240	1357	49	91	240	150
A00456:223:HMMCCDSXX:3:2149:21296:35556	gnl|BL_ORD_ID|0	100	150	0	0	91	240	1358	50	91	240	150
A00456:223:HMMCCDSXX:3:2401:7690:34882	gnl|BL_ORD_ID|0	100	150	0	0	91	240	1359	51	91	240	150
A00456:223:HMMCCDSXX:3:2513:25283:2347	gnl|BL_ORD_ID|0	100	150	0	0	91	240	1360	52	91	240	150
A00456:223:HMMCCDSXX:3:1123:16830:15702	gnl|BL_ORD_ID|0	98.667	150	2	0	92	241	1361	1	92	241	150
A00456:223:HMMCCDSXX:3:1123:16857:15749	gnl|BL_ORD_ID|0	100	150	0	0	92	241	1362	2	92	241	150
A00456:223:HMMCCDSXX:3:1133:10330:17534	gnl|BL_ORD_ID|0	99.333	150	1	0	92	241	1363	3	92	241	150
A00456:223:HMMCCDSXX:3:1161:16450:2957	gnl|BL_ORD_ID|0	100	150	0	0	92	241	1364	4	92	241	150
A00456:223:HMMCCDSXX:3:1161:9995:17237	gnl|BL_ORD_ID|0	100	150	0	0	92	241	1365	5	92	241	150
A00456:223:HMMCCDSXX:3:1169:31268:3662	gnl|BL_ORD_ID|0	100	150	0	0	92	241	1366	6	92	241	150
A00456:223:HMMCCDSXX:3:1269:1081:21590	gnl|BL_ORD_ID|0	100	150	0	0	92	241	1367	7	92	241	150
A00456:223:HMMCCDSXX:3:1304:19678:25927	gnl|BL_ORD_ID|0	100	150	0	0	92	241	1368	8	92	241	150
A00456:223:HMMCCDSXX:3:1308:26964:15655	gnl|BL_ORD_ID|0	100	150	0	0	92	241	1369	9	92	241	150
A00456:223:HMMCCDSXX:3:1325:3658:11459	gnl|BL_ORD_ID|0	100	150	0	0	92	241	1370	10	92	241	150
A00456:223:HMMCCDSXX:3:1339:15393:24893	gnl|BL_ORD_ID|0	100	150	0	0	92	241	1371	11	92	241	150
A00456:223:HMMCCDSXX:3:1368:26666:11005	gnl|BL_ORD_ID|0	100	150	0	0	92	241	1372	12	92	241	150
A00456:223:HMMCCDSXX:3:1422:21368:2018	gnl|BL_ORD_ID|0	100	150	0	0	92	241	1373	13	92	241	150
A00456:223:HMMCCDSXX:3:1445:2130:31485	gnl|BL_ORD_ID|0	100	150	0	0	92	241	1374	14	92	241	150
A00456:223:HMMCCDSXX:3:1454:32786:6292	gnl|BL_ORD_ID|0	100	150	0	0	92	241	1375	15	92	241	150
A00456:223:HMMCCDSXX:3:1468:18539:28463	gnl|BL_ORD_ID|0	100	150	0	0	92	241	1376	16	92	241	150
A00456:223:HMMCCDSXX:3:1515:5909:28009	gnl|BL_ORD_ID|0	100	150	0	0	92	241	1377	17	92	241	150
A00456:223:HMMCCDSXX:3:1557:17255:23672	gnl|BL_ORD_ID|0	100	150	0	0	92	241	1378	18	92	241	150
A00456:223:HMMCCDSXX:3:1564:32009:22576	gnl|BL_ORD_ID|0	99.333	150	1	0	92	241	1379	19	92	241	150
A00456:223:HMMCCDSXX:3:1603:26847:6903	gnl|BL_ORD_ID|0	100	150	0	0	92	241	1380	20	92	241	150
A00456:223:HMMCCDSXX:3:1603:27688:8171	gnl|BL_ORD_ID|0	100	150	0	0	92	241	1381	21	92	241	150
A00456:223:HMMCCDSXX:3:1668:23439:31125	gnl|BL_ORD_ID|0	100	150	0	0	92	241	1382	22	92	241	150
A00456:223:HMMCCDSXX:3:1676:6542:10128	gnl|BL_ORD_ID|0	100	150	0	0	92	241	1383	23	92	241	150
A00456:223:HMMCCDSXX:3:2125:23972:13009	gnl|BL_ORD_ID|0	100	150	0	0	92	241	1384	24	92	241	150
A00456:223:HMMCCDSXX:3:2138:22978:32330	gnl|BL_ORD_ID|0	100	150	0	0	92	241	1385	25	92	241	150
A00456:223:HMMCCDSXX:3:2141:14353:3615	gnl|BL_ORD_ID|0	100	150	0	0	92	241	1386	26	92	241	150
A00456:223:HMMCCDSXX:3:2165:19289:16423	gnl|BL_ORD_ID|0	98.667	150	2	0	92	241	1387	27	92	241	150
A00456:223:HMMCCDSXX:3:2173:25021:8876	gnl|BL_ORD_ID|0	100	150	0	0	92	241	1388	28	92	241	150
A00456:223:HMMCCDSXX:3:2218:21757:27179	gnl|BL_ORD_ID|0	100	150	0	0	92	241	1389	29	92	241	150
A00456:223:HMMCCDSXX:3:2246:2700:22294	gnl|BL_ORD_ID|0	100	150	0	0	92	241	1390	30	92	241	150
A00456:223:HMMCCDSXX:3:2275:29839:7326	gnl|BL_ORD_ID|0	100	150	0	0	92	241	1391	31	92	241	150
A00456:223:HMMCCDSXX:3:2275:29161:7341	gnl|BL_ORD_ID|0	100	150	0	0	92	241	1392	32	92	241	150
A00456:223:HMMCCDSXX:3:2323:15121:34538	gnl|BL_ORD_ID|0	100	150	0	0	92	241	1393	33	92	241	150
A00456:223:HMMCCDSXX:3:2332:30092:9236	gnl|BL_ORD_ID|0	100	150	0	0	92	241	1394	34	92	241	150
A00456:223:HMMCCDSXX:3:2347:5276:7560	gnl|BL_ORD_ID|0	97.333	150	4	0	92	241	1395	35	92	241	150
A00456:223:HMMCCDSXX:3:2403:11659:24001	gnl|BL_ORD_ID|0	99.333	150	1	0	92	241	1396	36	92	241	150
A00456:223:HMMCCDSXX:3:2427:2790:22701	gnl|BL_ORD_ID|0	100	150	0	0	92	241	1397	37	92	241	150
A00456:223:HMMCCDSXX:3:2505:17183:17973	gnl|BL_ORD_ID|0	99.333	150	1	0	92	241	1398	38	92	241	150
A00456:223:HMMCCDSXX:3:2514:21133:22811	gnl|BL_ORD_ID|0	100	150	0	0	92	241	1399	39	92	241	150
A00456:223:HMMCCDSXX:3:2625:16767:23641	gnl|BL_ORD_ID|0	100	150	0	0	92	241	1400	40	92	241	150
A00456:223:HMMCCDSXX:3:2659:21151:5588	gnl|BL_ORD_ID|0	100	150	0	0	92	241	1401	41	92	241	150
A00456:223:HMMCCDSXX:3:1138:21115:4930	gnl|BL_ORD_ID|0	100	150	0	0	92	241	1402	42	92	241	150
A00456:223:HMMCCDSXX:3:1141:25943:5838	gnl|BL_ORD_ID|0	100	150	0	0	92	241	1403	43	92	241	150
A00456:223:HMMCCDSXX:3:1158:8250:31939	gnl|BL_ORD_ID|0	100	150	0	0	92	241	1404	44	92	241	150
A00456:223:HMMCCDSXX:3:1162:1280:32581	gnl|BL_ORD_ID|0	100	150	0	0	92	241	1405	45	92	241	150
A00456:223:HMMCCDSXX:3:1169:18801:31266	gnl|BL_ORD_ID|0	100	150	0	0	92	241	1406	46	92	241	150
A00456:223:HMMCCDSXX:3:1234:8748:3082	gnl|BL_ORD_ID|0	100	150	0	0	92	241	1407	47	92	241	150
A00456:223:HMMCCDSXX:3:1239:12472:34867	gnl|BL_ORD_ID|0	100	150	0	0	92	241	1408	48	92	241	150
A00456:223:HMMCCDSXX:3:1319:6352:36855	gnl|BL_ORD_ID|0	100	150	0	0	92	241	1409	49	92	241	150
A00456:223:HMMCCDSXX:3:1324:16866:28009	gnl|BL_ORD_ID|0	100	150	0	0	92	241	1410	50	92	241	150
A00456:223:HMMCCDSXX:3:1406:16477:21480	gnl|BL_ORD_ID|0	100	150	0	0	92	241	1411	51	92	241	150
A00456:223:HMMCCDSXX:3:1406:18168:35211	gnl|BL_ORD_ID|0	100	150	0	0	92	241	1412	52	92	241	150
A00456:223:HMMCCDSXX:3:1459:24044:15076	gnl|BL_ORD_ID|0	100	150	0	0	92	241	1413	53	92	241	150
A00456:223:HMMCCDSXX:3:1478:17698:27038	gnl|BL_ORD_ID|0	99.333	150	1	0	92	241	1414	54	92	241	150
A00456:223:HMMCCDSXX:3:1545:26982:20791	gnl|BL_ORD_ID|0	100	150	0	0	92	241	1415	55	92	241	150
A00456:223:HMMCCDSXX:3:1578:19271:2080	gnl|BL_ORD_ID|0	100	150	0	0	92	241	1416	56	92	241	150
A00456:223:HMMCCDSXX:3:1643:28736:36605	gnl|BL_ORD_ID|0	100	150	0	0	92	241	1417	57	92	241	150
A00456:223:HMMCCDSXX:3:1666:8793:27993	gnl|BL_ORD_ID|0	100	150	0	0	92	241	1418	58	92	241	150
A00456:223:HMMCCDSXX:3:2118:10511:15123	gnl|BL_ORD_ID|0	100	150	0	0	92	241	1419	59	92	241	150
A00456:223:HMMCCDSXX:3:2169:4444:13917	gnl|BL_ORD_ID|0	100	150	0	0	92	241	1420	60	92	241	150
A00456:223:HMMCCDSXX:3:2207:15465:14340	gnl|BL_ORD_ID|0	100	150	0	0	92	241	1421	61	92	241	150
A00456:223:HMMCCDSXX:3:2228:2320:10050	gnl|BL_ORD_ID|0	100	150	0	0	92	241	1422	62	92	241	150
A00456:223:HMMCCDSXX:3:2228:2456:10535	gnl|BL_ORD_ID|0	100	150	0	0	92	241	1423	63	92	241	150
A00456:223:HMMCCDSXX:3:2243:32461:9017	gnl|BL_ORD_ID|0	100	150	0	0	92	241	1424	64	92	241	150
A00456:223:HMMCCDSXX:3:2252:16387:28902	gnl|BL_ORD_ID|0	100	150	0	0	92	241	1425	65	92	241	150
A00456:223:HMMCCDSXX:3:2313:18701:4319	gnl|BL_ORD_ID|0	100	150	0	0	92	241	1426	66	92	241	150
A00456:223:HMMCCDSXX:3:2325:16477:26334	gnl|BL_ORD_ID|0	100	150	0	0	92	241	1427	67	92	241	150
A00456:223:HMMCCDSXX:3:2405:16441:2284	gnl|BL_ORD_ID|0	99.333	150	1	0	92	241	1428	68	92	241	150
A00456:223:HMMCCDSXX:3:2465:6090:12633	gnl|BL_ORD_ID|0	100	150	0	0	92	241	1429	69	92	241	150
A00456:223:HMMCCDSXX:3:2525:27661:34898	gnl|BL_ORD_ID|0	98	150	3	0	92	241	1430	70	92	241	150
A00456:223:HMMCCDSXX:3:2535:15763:12226	gnl|BL_ORD_ID|0	100	150	0	0	92	241	1431	71	92	241	150
A00456:223:HMMCCDSXX:3:2614:27561:28526	gnl|BL_ORD_ID|0	100	150	0	0	92	241	1432	72	92	241	150
A00456:223:HMMCCDSXX:3:2631:1922:30436	gnl|BL_ORD_ID|0	100	150	0	0	92	241	1433	73	92	241	150
A00456:223:HMMCCDSXX:3:2647:22598:18803	gnl|BL_ORD_ID|0	100	150	0	0	92	241	1434	74	92	241	150
A00456:223:HMMCCDSXX:3:2663:18945:35869	gnl|BL_ORD_ID|0	100	150	0	0	92	241	1435	75	92	241	150
A00456:223:HMMCCDSXX:3:2663:18819:35806	gnl|BL_ORD_ID|0	100	150	0	0	92	241	1436	76	92	241	150
A00456:223:HMMCCDSXX:3:2672:11623:33739	gnl|BL_ORD_ID|0	100	150	0	0	92	241	1437	77	92	241	150
A00456:223:HMMCCDSXX:3:1102:32163:34741	gnl|BL_ORD_ID|0	100	149	0	0	92	240	1438	78	92	240	149
A00456:223:HMMCCDSXX:3:1415:27046:25003	gnl|BL_ORD_ID|0	100	148	0	0	92	239	1439	79	92	239	148
A00456:223:HMMCCDSXX:3:1436:1913:10535	gnl|BL_ORD_ID|0	100	150	0	0	92	241	1440	80	92	241	150
A00456:223:HMMCCDSXX:3:2430:3423:5822	gnl|BL_ORD_ID|0	100	150	0	0	92	241	1441	81	92	241	150
A00456:223:HMMCCDSXX:3:2508:23041:11898	gnl|BL_ORD_ID|0	100	150	0	0	92	241	1442	82	92	241	150
A00456:223:HMMCCDSXX:3:2667:13431:15671	gnl|BL_ORD_ID|0	100	150	0	0	92	241	1443	83	92	241	150
A00456:223:HMMCCDSXX:3:1130:4860:23970	gnl|BL_ORD_ID|0	98	150	3	0	92	241	1444	84	92	241	150
A00456:223:HMMCCDSXX:3:1571:24153:9189	gnl|BL_ORD_ID|0	100	150	0	0	92	241	1445	85	92	241	150
A00456:223:HMMCCDSXX:3:2323:15121:34538	gnl|BL_ORD_ID|0	100	150	0	0	92	241	1446	86	92	241	150
A00456:223:HMMCCDSXX:3:2667:11758:16344	gnl|BL_ORD_ID|0	100	150	0	0	92	241	1447	87	92	241	150
A00456:223:HMMCCDSXX:3:2667:12961:18270	gnl|BL_ORD_ID|0	100	150	0	0	92	241	1448	88	92	241	150
A00456:223:HMMCCDSXX:3:1133:18240:6308	gnl|BL_ORD_ID|0	99.338	151	1	1	93	243	1449	1	93	243	151
A00456:223:HMMCCDSXX:3:1234:12174:19257	gnl|BL_ORD_ID|0	100	150	0	0	93	242	1450	2	93	242	150
A00456:223:HMMCCDSXX:3:1307:23972:27727	gnl|BL_ORD_ID|0	100	150	0	0	93	242	1451	3	93	242	150
A00456:223:HMMCCDSXX:3:1376:2754:29371	gnl|BL_ORD_ID|0	100	150	0	0	93	242	1452	4	93	242	150
A00456:223:HMMCCDSXX:3:1525:25165:31266	gnl|BL_ORD_ID|0	100	150	0	0	93	242	1453	5	93	242	150
A00456:223:HMMCCDSXX:3:2204:26639:36385	gnl|BL_ORD_ID|0	99.333	150	1	0	93	242	1454	6	93	242	150
A00456:223:HMMCCDSXX:3:2304:8232:13432	gnl|BL_ORD_ID|0	100	150	0	0	93	242	1455	7	93	242	150
A00456:223:HMMCCDSXX:3:2345:17915:16642	gnl|BL_ORD_ID|0	100	150	0	0	93	242	1456	8	93	242	150
A00456:223:HMMCCDSXX:3:2415:24749:31579	gnl|BL_ORD_ID|0	100	150	0	0	93	242	1457	9	93	242	150
A00456:223:HMMCCDSXX:3:2564:21423:33771	gnl|BL_ORD_ID|0	100	150	0	0	93	242	1458	10	93	242	150
A00456:223:HMMCCDSXX:3:2667:11758:16344	gnl|BL_ORD_ID|0	100	150	0	0	93	242	1459	11	93	242	150
A00456:223:HMMCCDSXX:3:2667:12961:18270	gnl|BL_ORD_ID|0	100	150	0	0	93	242	1460	12	93	242	150
A00456:223:HMMCCDSXX:3:1337:9064:31845	gnl|BL_ORD_ID|0	100	150	0	0	93	242	1461	13	93	242	150
A00456:223:HMMCCDSXX:3:1337:9317:32033	gnl|BL_ORD_ID|0	100	150	0	0	93	242	1462	14	93	242	150
A00456:223:HMMCCDSXX:3:1429:17210:34522	gnl|BL_ORD_ID|0	98.667	150	2	0	93	242	1463	15	93	242	150
A00456:223:HMMCCDSXX:3:1445:2220:25848	gnl|BL_ORD_ID|0	100	150	0	0	93	242	1464	16	93	242	150
A00456:223:HMMCCDSXX:3:1445:2654:28948	gnl|BL_ORD_ID|0	100	150	0	0	93	242	1465	17	93	242	150
A00456:223:HMMCCDSXX:3:1567:21007:10911	gnl|BL_ORD_ID|0	100	150	0	0	93	242	1466	18	93	242	150
A00456:223:HMMCCDSXX:3:2123:4463:35055	gnl|BL_ORD_ID|0	100	150	0	0	93	242	1467	19	93	242	150
A00456:223:HMMCCDSXX:3:2267:29225:24142	gnl|BL_ORD_ID|0	100	150	0	0	93	242	1468	20	93	242	150
A00456:223:HMMCCDSXX:3:2563:25192:25645	gnl|BL_ORD_ID|0	100	150	0	0	93	242	1469	21	93	242	150
A00456:223:HMMCCDSXX:3:2662:1316:26819	gnl|BL_ORD_ID|0	100	150	0	0	93	242	1470	22	93	242	150
A00456:223:HMMCCDSXX:3:1243:13105:11099	gnl|BL_ORD_ID|0	100	149	0	0	93	241	1471	23	93	241	149
A00456:223:HMMCCDSXX:3:1567:17246:25661	gnl|BL_ORD_ID|0	100	149	0	0	93	241	1472	24	93	241	149
A00456:223:HMMCCDSXX:3:1629:1976:14403	gnl|BL_ORD_ID|0	100	149	0	0	93	241	1473	25	93	241	149
A00456:223:HMMCCDSXX:3:2439:21838:19398	gnl|BL_ORD_ID|0	100	149	0	0	93	241	1474	26	93	241	149
A00456:223:HMMCCDSXX:3:2543:28673:21277	gnl|BL_ORD_ID|0	99.329	149	1	0	93	241	1475	27	93	241	149
A00456:223:HMMCCDSXX:3:1207:26720:3208	gnl|BL_ORD_ID|0	100	149	0	0	93	241	1476	28	93	241	149
A00456:223:HMMCCDSXX:3:1303:27471:33974	gnl|BL_ORD_ID|0	100	149	0	0	93	241	1477	29	93	241	149
A00456:223:HMMCCDSXX:3:1360:26675:23077	gnl|BL_ORD_ID|0	100	149	0	0	93	241	1478	30	93	241	149
A00456:223:HMMCCDSXX:3:1571:26494:21793	gnl|BL_ORD_ID|0	100	149	0	0	93	241	1479	31	93	241	149
A00456:223:HMMCCDSXX:3:2369:14271:32972	gnl|BL_ORD_ID|0	100	149	0	0	93	241	1480	32	93	241	149
A00456:223:HMMCCDSXX:3:2654:17779:4852	gnl|BL_ORD_ID|0	98.658	149	2	0	93	241	1481	33	93	241	149
A00456:223:HMMCCDSXX:3:2671:11062:25629	gnl|BL_ORD_ID|0	98.658	149	2	0	93	241	1482	34	93	241	149
A00456:223:HMMCCDSXX:3:1151:27787:23594	gnl|BL_ORD_ID|0	100	150	0	0	93	242	1483	35	93	242	150
A00456:223:HMMCCDSXX:3:1570:7328:17378	gnl|BL_ORD_ID|0	100	150	0	0	93	242	1484	36	93	242	150
A00456:223:HMMCCDSXX:3:2435:16938:4523	gnl|BL_ORD_ID|0	100	150	0	0	93	242	1485	37	93	242	150
A00456:223:HMMCCDSXX:3:1117:16767:14309	gnl|BL_ORD_ID|0	100	150	0	0	94	243	1486	1	94	243	150
A00456:223:HMMCCDSXX:3:1126:1461:3740	gnl|BL_ORD_ID|0	100	150	0	0	94	243	1487	2	94	243	150
A00456:223:HMMCCDSXX:3:1133:13593:1485	gnl|BL_ORD_ID|0	100	150	0	0	94	243	1488	3	94	243	150
A00456:223:HMMCCDSXX:3:1156:14787:8218	gnl|BL_ORD_ID|0	100	150	0	0	94	243	1489	4	94	243	150
A00456:223:HMMCCDSXX:3:1170:17273:23296	gnl|BL_ORD_ID|0	100	150	0	0	94	243	1490	5	94	243	150
A00456:223:HMMCCDSXX:3:1173:18900:17472	gnl|BL_ORD_ID|0	100	150	0	0	94	243	1491	6	94	243	150
A00456:223:HMMCCDSXX:3:1216:28989:15906	gnl|BL_ORD_ID|0	99.333	150	1	0	94	243	1492	7	94	243	150
A00456:223:HMMCCDSXX:3:1247:28772:23265	gnl|BL_ORD_ID|0	100	150	0	0	94	243	1493	8	94	243	150
A00456:223:HMMCCDSXX:3:1249:23891:24455	gnl|BL_ORD_ID|0	100	150	0	0	94	243	1494	9	94	243	150
A00456:223:HMMCCDSXX:3:1250:13630:20337	gnl|BL_ORD_ID|0	100	150	0	0	94	243	1495	10	94	243	150
A00456:223:HMMCCDSXX:3:1301:24686:29684	gnl|BL_ORD_ID|0	98.667	150	2	0	94	243	1496	11	94	243	150
A00456:223:HMMCCDSXX:3:1315:12653:3897	gnl|BL_ORD_ID|0	100	150	0	0	94	243	1497	12	94	243	150
A00456:223:HMMCCDSXX:3:1322:17879:19961	gnl|BL_ORD_ID|0	96.667	150	5	0	94	243	1498	13	94	243	150
A00456:223:HMMCCDSXX:3:1331:22932:12085	gnl|BL_ORD_ID|0	100	150	0	0	94	243	1499	14	94	243	150
A00456:223:HMMCCDSXX:3:1353:15230:5822	gnl|BL_ORD_ID|0	100	150	0	0	94	243	1500	15	94	243	150
A00456:223:HMMCCDSXX:3:1366:1841:5776	gnl|BL_ORD_ID|0	99.333	150	1	0	94	243	1501	16	94	243	150
A00456:223:HMMCCDSXX:3:1369:5511:5932	gnl|BL_ORD_ID|0	100	150	0	0	94	243	1502	17	94	243	150
A00456:223:HMMCCDSXX:3:1411:14073:13714	gnl|BL_ORD_ID|0	100	150	0	0	94	243	1503	18	94	243	150
A00456:223:HMMCCDSXX:3:1428:21929:21934	gnl|BL_ORD_ID|0	100	150	0	0	94	243	1504	19	94	243	150
A00456:223:HMMCCDSXX:3:1432:17228:3771	gnl|BL_ORD_ID|0	100	150	0	0	94	243	1505	20	94	243	150
A00456:223:HMMCCDSXX:3:1459:26069:23406	gnl|BL_ORD_ID|0	100	150	0	0	94	243	1506	21	94	243	150
A00456:223:HMMCCDSXX:3:1530:15691:2362	gnl|BL_ORD_ID|0	100	150	0	0	94	243	1507	22	94	243	150
A00456:223:HMMCCDSXX:3:1538:24198:2190	gnl|BL_ORD_ID|0	100	150	0	0	94	243	1508	23	94	243	150
A00456:223:HMMCCDSXX:3:1543:30716:25347	gnl|BL_ORD_ID|0	99.333	150	1	0	94	243	1509	24	94	243	150
A00456:223:HMMCCDSXX:3:1563:8820:18771	gnl|BL_ORD_ID|0	100	150	0	0	94	243	1510	25	94	243	150
A00456:223:HMMCCDSXX:3:1629:23692:5916	gnl|BL_ORD_ID|0	100	150	0	0	94	243	1511	26	94	243	150
A00456:223:HMMCCDSXX:3:2117:29595:26068	gnl|BL_ORD_ID|0	100	150	0	0	94	243	1512	27	94	243	150
A00456:223:HMMCCDSXX:3:2125:3152:33786	gnl|BL_ORD_ID|0	100	150	0	0	94	243	1513	28	94	243	150
A00456:223:HMMCCDSXX:3:2155:14064:8187	gnl|BL_ORD_ID|0	99.333	150	1	0	94	243	1514	29	94	243	150
A00456:223:HMMCCDSXX:3:2165:7844:35650	gnl|BL_ORD_ID|0	100	150	0	0	94	243	1515	30	94	243	150
A00456:223:HMMCCDSXX:3:2237:14253:36730	gnl|BL_ORD_ID|0	100	150	0	0	94	243	1516	31	94	243	150
A00456:223:HMMCCDSXX:3:2244:25238:16141	gnl|BL_ORD_ID|0	100	150	0	0	94	243	1517	32	94	243	150
A00456:223:HMMCCDSXX:3:2247:20066:10974	gnl|BL_ORD_ID|0	100	150	0	0	94	243	1518	33	94	243	150
A00456:223:HMMCCDSXX:3:2252:26268:11725	gnl|BL_ORD_ID|0	100	150	0	0	94	243	1519	34	94	243	150
A00456:223:HMMCCDSXX:3:2358:3477:11710	gnl|BL_ORD_ID|0	100	150	0	0	94	243	1520	35	94	243	150
A00456:223:HMMCCDSXX:3:2358:3161:11663	gnl|BL_ORD_ID|0	100	150	0	0	94	243	1521	36	94	243	150
A00456:223:HMMCCDSXX:3:2373:25364:35368	gnl|BL_ORD_ID|0	100	150	0	0	94	243	1522	37	94	243	150
A00456:223:HMMCCDSXX:3:2414:16251:26318	gnl|BL_ORD_ID|0	100	150	0	0	94	243	1523	38	94	243	150
A00456:223:HMMCCDSXX:3:2426:5493:25786	gnl|BL_ORD_ID|0	100	150	0	0	94	243	1524	39	94	243	150
A00456:223:HMMCCDSXX:3:2426:5575:25958	gnl|BL_ORD_ID|0	100	150	0	0	94	243	1525	40	94	243	150
A00456:223:HMMCCDSXX:3:2429:12680:10207	gnl|BL_ORD_ID|0	97.333	150	4	0	94	243	1526	41	94	243	150
A00456:223:HMMCCDSXX:3:2430:1307:5572	gnl|BL_ORD_ID|0	100	150	0	0	94	243	1527	42	94	243	150
A00456:223:HMMCCDSXX:3:2461:31430:9204	gnl|BL_ORD_ID|0	100	150	0	0	94	243	1528	43	94	243	150
A00456:223:HMMCCDSXX:3:2526:30110:35728	gnl|BL_ORD_ID|0	100	150	0	0	94	243	1529	44	94	243	150
A00456:223:HMMCCDSXX:3:2528:20537:9909	gnl|BL_ORD_ID|0	100	150	0	0	94	243	1530	45	94	243	150
A00456:223:HMMCCDSXX:3:2528:19578:10567	gnl|BL_ORD_ID|0	100	150	0	0	94	243	1531	46	94	243	150
A00456:223:HMMCCDSXX:3:2571:16550:26365	gnl|BL_ORD_ID|0	100	150	0	0	94	243	1532	47	94	243	150
A00456:223:HMMCCDSXX:3:2572:13051:19429	gnl|BL_ORD_ID|0	100	150	0	0	94	243	1533	48	94	243	150
A00456:223:HMMCCDSXX:3:2572:11433:26553	gnl|BL_ORD_ID|0	100	150	0	0	94	243	1534	49	94	243	150
A00456:223:HMMCCDSXX:3:2652:7355:1861	gnl|BL_ORD_ID|0	100	150	0	0	94	243	1535	50	94	243	150
A00456:223:HMMCCDSXX:3:1125:23619:34569	gnl|BL_ORD_ID|0	100	150	0	0	94	243	1536	51	94	243	150
A00456:223:HMMCCDSXX:3:1134:29152:19132	gnl|BL_ORD_ID|0	100	150	0	0	94	243	1537	52	94	243	150
A00456:223:HMMCCDSXX:3:1201:15067:8641	gnl|BL_ORD_ID|0	100	150	0	0	94	243	1538	53	94	243	150
A00456:223:HMMCCDSXX:3:1213:16414:36245	gnl|BL_ORD_ID|0	100	150	0	0	94	243	1539	54	94	243	150
A00456:223:HMMCCDSXX:3:1240:30644:32330	gnl|BL_ORD_ID|0	100	150	0	0	94	243	1540	55	94	243	150
A00456:223:HMMCCDSXX:3:1302:7392:2174	gnl|BL_ORD_ID|0	99.333	150	1	0	94	243	1541	56	94	243	150
A00456:223:HMMCCDSXX:3:1325:26368:15154	gnl|BL_ORD_ID|0	98.667	150	2	0	94	243	1542	57	94	243	150
A00456:223:HMMCCDSXX:3:1332:11107:7545	gnl|BL_ORD_ID|0	100	150	0	0	94	243	1543	58	94	243	150
A00456:223:HMMCCDSXX:3:1343:32362:34303	gnl|BL_ORD_ID|0	99.333	150	1	0	94	243	1544	59	94	243	150
A00456:223:HMMCCDSXX:3:1415:22887:26537	gnl|BL_ORD_ID|0	100	150	0	0	94	243	1545	60	94	243	150
A00456:223:HMMCCDSXX:3:1440:22535:33974	gnl|BL_ORD_ID|0	99.333	150	1	0	94	243	1546	61	94	243	150
A00456:223:HMMCCDSXX:3:1445:22218:33865	gnl|BL_ORD_ID|0	100	150	0	0	94	243	1547	62	94	243	150
A00456:223:HMMCCDSXX:3:1451:22309:20682	gnl|BL_ORD_ID|0	100	150	0	0	94	243	1548	63	94	243	150
A00456:223:HMMCCDSXX:3:1452:19849:4930	gnl|BL_ORD_ID|0	100	150	0	0	94	243	1549	64	94	243	150
A00456:223:HMMCCDSXX:3:1454:15790:35697	gnl|BL_ORD_ID|0	100	150	0	0	94	243	1550	65	94	243	150
A00456:223:HMMCCDSXX:3:1466:19162:3427	gnl|BL_ORD_ID|0	100	150	0	0	94	243	1551	66	94	243	150
A00456:223:HMMCCDSXX:3:1469:26648:13103	gnl|BL_ORD_ID|0	100	150	0	0	94	243	1552	67	94	243	150
A00456:223:HMMCCDSXX:3:1517:19063:9079	gnl|BL_ORD_ID|0	100	150	0	0	94	243	1553	68	94	243	150
A00456:223:HMMCCDSXX:3:1528:24975:16094	gnl|BL_ORD_ID|0	100	150	0	0	94	243	1554	69	94	243	150
A00456:223:HMMCCDSXX:3:1570:23366:36667	gnl|BL_ORD_ID|0	100	150	0	0	94	243	1555	70	94	243	150
A00456:223:HMMCCDSXX:3:1613:14299:25661	gnl|BL_ORD_ID|0	100	150	0	0	94	243	1556	71	94	243	150
A00456:223:HMMCCDSXX:3:1622:28999:20964	gnl|BL_ORD_ID|0	100	150	0	0	94	243	1557	72	94	243	150
A00456:223:HMMCCDSXX:3:1626:5683:17033	gnl|BL_ORD_ID|0	100	150	0	0	94	243	1558	73	94	243	150
A00456:223:HMMCCDSXX:3:1633:11171:1423	gnl|BL_ORD_ID|0	100	150	0	0	94	243	1559	74	94	243	150
A00456:223:HMMCCDSXX:3:1656:26693:26334	gnl|BL_ORD_ID|0	100	150	0	0	94	243	1560	75	94	243	150
A00456:223:HMMCCDSXX:3:1657:9082:1532	gnl|BL_ORD_ID|0	100	150	0	0	94	243	1561	76	94	243	150
A00456:223:HMMCCDSXX:3:1657:29405:4319	gnl|BL_ORD_ID|0	100	150	0	0	94	243	1562	77	94	243	150
A00456:223:HMMCCDSXX:3:1667:10411:24377	gnl|BL_ORD_ID|0	100	150	0	0	94	243	1563	78	94	243	150
A00456:223:HMMCCDSXX:3:1672:9959:17989	gnl|BL_ORD_ID|0	100	150	0	0	94	243	1564	79	94	243	150
A00456:223:HMMCCDSXX:3:1673:3405:29371	gnl|BL_ORD_ID|0	100	150	0	0	94	243	1565	80	94	243	150
A00456:223:HMMCCDSXX:3:2110:20356:24189	gnl|BL_ORD_ID|0	100	150	0	0	94	243	1566	81	94	243	150
A00456:223:HMMCCDSXX:3:2174:10538:21465	gnl|BL_ORD_ID|0	100	150	0	0	94	243	1567	82	94	243	150
A00456:223:HMMCCDSXX:3:2206:29478:35697	gnl|BL_ORD_ID|0	99.333	150	1	0	94	243	1568	83	94	243	150
A00456:223:HMMCCDSXX:3:2207:15311:26412	gnl|BL_ORD_ID|0	100	150	0	0	94	243	1569	84	94	243	150
A00456:223:HMMCCDSXX:3:2223:24822:12727	gnl|BL_ORD_ID|0	98.667	150	2	0	94	243	1570	85	94	243	150
A00456:223:HMMCCDSXX:3:2240:17842:10473	gnl|BL_ORD_ID|0	100	150	0	0	94	243	1571	86	94	243	150
A00456:223:HMMCCDSXX:3:2260:16848:24972	gnl|BL_ORD_ID|0	100	150	0	0	94	243	1572	87	94	243	150
A00456:223:HMMCCDSXX:3:2277:32054:17581	gnl|BL_ORD_ID|0	100	150	0	0	94	243	1573	88	94	243	150
A00456:223:HMMCCDSXX:3:2310:12726:30452	gnl|BL_ORD_ID|0	100	150	0	0	94	243	1574	89	94	243	150
A00456:223:HMMCCDSXX:3:2402:15890:28510	gnl|BL_ORD_ID|0	100	150	0	0	94	243	1575	90	94	243	150
A00456:223:HMMCCDSXX:3:2437:28348:24972	gnl|BL_ORD_ID|0	100	150	0	0	94	243	1576	91	94	243	150
A00456:223:HMMCCDSXX:3:2449:4652:32941	gnl|BL_ORD_ID|0	100	150	0	0	94	243	1577	92	94	243	150
A00456:223:HMMCCDSXX:3:2458:27534:8469	gnl|BL_ORD_ID|0	100	150	0	0	94	243	1578	93	94	243	150
A00456:223:HMMCCDSXX:3:2476:21811:21042	gnl|BL_ORD_ID|0	100	150	0	0	94	243	1579	94	94	243	150
A00456:223:HMMCCDSXX:3:2501:13376:3270	gnl|BL_ORD_ID|0	98.667	150	2	0	94	243	1580	95	94	243	150
A00456:223:HMMCCDSXX:3:2501:14705:4633	gnl|BL_ORD_ID|0	99.333	150	1	0	94	243	1581	96	94	243	150
A00456:223:HMMCCDSXX:3:2606:23945:5040	gnl|BL_ORD_ID|0	98.667	150	2	0	94	243	1582	97	94	243	150
A00456:223:HMMCCDSXX:3:2607:23791:12665	gnl|BL_ORD_ID|0	100	150	0	0	94	243	1583	98	94	243	150
A00456:223:HMMCCDSXX:3:2621:15347:36808	gnl|BL_ORD_ID|0	100	150	0	0	94	243	1584	99	94	243	150
A00456:223:HMMCCDSXX:3:2626:4887:2284	gnl|BL_ORD_ID|0	100	150	0	0	94	243	1585	100	94	243	150
A00456:223:HMMCCDSXX:3:2376:13865:2080	gnl|BL_ORD_ID|0	100	149	0	0	94	242	1586	101	94	242	149
A00456:223:HMMCCDSXX:3:1254:18566:4429	gnl|BL_ORD_ID|0	100	149	0	0	94	242	1587	102	94	242	149
A00456:223:HMMCCDSXX:3:1254:18575:4726	gnl|BL_ORD_ID|0	100	149	0	0	94	242	1588	103	94	242	149
A00456:223:HMMCCDSXX:3:1254:18792:5415	gnl|BL_ORD_ID|0	100	149	0	0	94	242	1589	104	94	242	149
A00456:223:HMMCCDSXX:3:1310:19316:1125	gnl|BL_ORD_ID|0	100	149	0	0	94	242	1590	105	94	242	149
A00456:223:HMMCCDSXX:3:1517:5276:1110	gnl|BL_ORD_ID|0	100	149	0	0	94	242	1591	106	94	242	149
A00456:223:HMMCCDSXX:3:2328:25735:27211	gnl|BL_ORD_ID|0	100	149	0	0	94	242	1592	107	94	242	149
A00456:223:HMMCCDSXX:3:1459:13738:17581	gnl|BL_ORD_ID|0	99.324	148	1	0	94	241	1593	108	94	241	148
A00456:223:HMMCCDSXX:3:2242:27688:16031	gnl|BL_ORD_ID|0	100	148	0	0	94	241	1594	109	94	241	148
A00456:223:HMMCCDSXX:3:1321:31855:23281	gnl|BL_ORD_ID|0	99.338	151	1	1	95	245	1595	1	95	245	151
A00456:223:HMMCCDSXX:3:1226:12527:32612	gnl|BL_ORD_ID|0	100	150	0	0	95	244	1596	2	95	244	150
A00456:223:HMMCCDSXX:3:1302:28971:24017	gnl|BL_ORD_ID|0	92.667	150	11	0	95	244	1597	3	95	244	150
A00456:223:HMMCCDSXX:3:2132:9299:1908	gnl|BL_ORD_ID|0	100	150	0	0	95	244	1598	4	95	244	150
A00456:223:HMMCCDSXX:3:2132:8883:2127	gnl|BL_ORD_ID|0	100	150	0	0	95	244	1599	5	95	244	150
A00456:223:HMMCCDSXX:3:2413:13060:24987	gnl|BL_ORD_ID|0	100	150	0	0	95	244	1600	6	95	244	150
A00456:223:HMMCCDSXX:3:2541:15591:5541	gnl|BL_ORD_ID|0	100	150	0	0	95	244	1601	7	95	244	150
A00456:223:HMMCCDSXX:3:1109:25473:8625	gnl|BL_ORD_ID|0	100	150	0	0	95	244	1602	8	95	244	150
A00456:223:HMMCCDSXX:3:1114:24587:32299	gnl|BL_ORD_ID|0	100	150	0	0	95	244	1603	9	95	244	150
A00456:223:HMMCCDSXX:3:1215:10945:25238	gnl|BL_ORD_ID|0	100	149	0	0	95	243	1604	10	95	243	149
A00456:223:HMMCCDSXX:3:1324:17002:27837	gnl|BL_ORD_ID|0	96.599	147	5	0	95	241	1605	11	95	241	147
A00456:223:HMMCCDSXX:3:1435:28700:13275	gnl|BL_ORD_ID|0	100	150	0	0	95	244	1606	12	95	244	150
A00456:223:HMMCCDSXX:3:1450:20193:6872	gnl|BL_ORD_ID|0	98.667	150	2	0	95	244	1607	13	95	244	150
A00456:223:HMMCCDSXX:3:1677:17526:5603	gnl|BL_ORD_ID|0	100	150	0	0	95	244	1608	14	95	244	150
A00456:223:HMMCCDSXX:3:1227:15302:18662	gnl|BL_ORD_ID|0	99.338	151	1	1	95	245	1609	15	95	245	151
A00456:223:HMMCCDSXX:3:1330:3197:2581	gnl|BL_ORD_ID|0	100	150	0	0	96	245	1610	1	96	245	150
A00456:223:HMMCCDSXX:3:1403:7518:19586	gnl|BL_ORD_ID|0	100	150	0	0	96	245	1611	2	96	245	150
A00456:223:HMMCCDSXX:3:1403:7464:19930	gnl|BL_ORD_ID|0	100	150	0	0	96	245	1612	3	96	245	150
A00456:223:HMMCCDSXX:3:1448:9362:12602	gnl|BL_ORD_ID|0	100	150	0	0	96	245	1613	4	96	245	150
A00456:223:HMMCCDSXX:3:1559:16052:4147	gnl|BL_ORD_ID|0	99.333	150	1	0	96	245	1614	5	96	245	150
A00456:223:HMMCCDSXX:3:2107:31358:8108	gnl|BL_ORD_ID|0	100	150	0	0	96	245	1615	6	96	245	150
A00456:223:HMMCCDSXX:3:2319:3920:17425	gnl|BL_ORD_ID|0	100	150	0	0	96	245	1616	7	96	245	150
A00456:223:HMMCCDSXX:3:2319:3875:18443	gnl|BL_ORD_ID|0	100	150	0	0	96	245	1617	8	96	245	150
A00456:223:HMMCCDSXX:3:2338:4444:23343	gnl|BL_ORD_ID|0	100	150	0	0	96	245	1618	9	96	245	150
A00456:223:HMMCCDSXX:3:2401:7690:34882	gnl|BL_ORD_ID|0	100	150	0	0	96	245	1619	10	96	245	150
A00456:223:HMMCCDSXX:3:2404:32777:3239	gnl|BL_ORD_ID|0	100	150	0	0	96	245	1620	11	96	245	150
A00456:223:HMMCCDSXX:3:2513:25283:2347	gnl|BL_ORD_ID|0	100	150	0	0	96	245	1621	12	96	245	150
A00456:223:HMMCCDSXX:3:2540:26277:19163	gnl|BL_ORD_ID|0	100	150	0	0	96	245	1622	13	96	245	150
A00456:223:HMMCCDSXX:3:2545:11098:13135	gnl|BL_ORD_ID|0	100	150	0	0	96	245	1623	14	96	245	150
A00456:223:HMMCCDSXX:3:1230:10899:10160	gnl|BL_ORD_ID|0	100	150	0	0	96	245	1624	15	96	245	150
A00456:223:HMMCCDSXX:3:1230:10836:10739	gnl|BL_ORD_ID|0	100	150	0	0	96	245	1625	16	96	245	150
A00456:223:HMMCCDSXX:3:1242:24189:27884	gnl|BL_ORD_ID|0	100	150	0	0	96	245	1626	17	96	245	150
A00456:223:HMMCCDSXX:3:1258:28646:12367	gnl|BL_ORD_ID|0	100	150	0	0	96	245	1627	18	96	245	150
A00456:223:HMMCCDSXX:3:1336:10592:9064	gnl|BL_ORD_ID|0	100	150	0	0	96	245	1628	19	96	245	150
A00456:223:HMMCCDSXX:3:1436:1913:10535	gnl|BL_ORD_ID|0	100	150	0	0	96	245	1629	20	96	245	150
A00456:223:HMMCCDSXX:3:1465:20790:15076	gnl|BL_ORD_ID|0	100	150	0	0	96	245	1630	21	96	245	150
A00456:223:HMMCCDSXX:3:1476:25952:7169	gnl|BL_ORD_ID|0	100	150	0	0	96	245	1631	22	96	245	150
A00456:223:HMMCCDSXX:3:1509:13829:12383	gnl|BL_ORD_ID|0	100	150	0	0	96	245	1632	23	96	245	150
A00456:223:HMMCCDSXX:3:1514:4200:10989	gnl|BL_ORD_ID|0	100	150	0	0	96	245	1633	24	96	245	150
A00456:223:HMMCCDSXX:3:1623:11550:32236	gnl|BL_ORD_ID|0	100	150	0	0	96	245	1634	25	96	245	150
A00456:223:HMMCCDSXX:3:1657:23448:23093	gnl|BL_ORD_ID|0	100	150	0	0	96	245	1635	26	96	245	150
A00456:223:HMMCCDSXX:3:2126:17002:10833	gnl|BL_ORD_ID|0	100	150	0	0	96	245	1636	27	96	245	150
A00456:223:HMMCCDSXX:3:2204:8540:31250	gnl|BL_ORD_ID|0	100	150	0	0	96	245	1637	28	96	245	150
A00456:223:HMMCCDSXX:3:2226:3369:2127	gnl|BL_ORD_ID|0	100	150	0	0	96	245	1638	29	96	245	150
A00456:223:HMMCCDSXX:3:2269:26015:25191	gnl|BL_ORD_ID|0	100	150	0	0	96	245	1639	30	96	245	150
A00456:223:HMMCCDSXX:3:2269:24813:25739	gnl|BL_ORD_ID|0	100	150	0	0	96	245	1640	31	96	245	150
A00456:223:HMMCCDSXX:3:2339:29206:19852	gnl|BL_ORD_ID|0	100	150	0	0	96	245	1641	32	96	245	150
A00456:223:HMMCCDSXX:3:2346:27308:34726	gnl|BL_ORD_ID|0	100	150	0	0	96	245	1642	33	96	245	150
A00456:223:HMMCCDSXX:3:2438:16731:11584	gnl|BL_ORD_ID|0	100	150	0	0	96	245	1643	34	96	245	150
A00456:223:HMMCCDSXX:3:2570:24740:30185	gnl|BL_ORD_ID|0	100	150	0	0	96	245	1644	35	96	245	150
A00456:223:HMMCCDSXX:3:2626:26639:28839	gnl|BL_ORD_ID|0	100	150	0	0	96	245	1645	36	96	245	150
A00456:223:HMMCCDSXX:3:2678:13042:20948	gnl|BL_ORD_ID|0	100	150	0	0	96	245	1646	37	96	245	150
A00456:223:HMMCCDSXX:3:1356:13774:35869	gnl|BL_ORD_ID|0	98.649	148	2	0	96	243	1647	38	96	243	148
A00456:223:HMMCCDSXX:3:1578:27642:12132	gnl|BL_ORD_ID|0	100	147	0	0	96	242	1648	39	96	242	147
A00456:223:HMMCCDSXX:3:2303:2546:23719	gnl|BL_ORD_ID|0	100	147	0	0	96	242	1649	40	96	242	147
A00456:223:HMMCCDSXX:3:2119:17029:33301	gnl|BL_ORD_ID|0	100	150	0	0	96	245	1650	41	96	245	150
A00456:223:HMMCCDSXX:3:2170:7030:21183	gnl|BL_ORD_ID|0	100	150	0	0	96	245	1651	42	96	245	150
A00456:223:HMMCCDSXX:3:1522:17354:33207	gnl|BL_ORD_ID|0	100	150	0	0	96	245	1652	43	96	245	150
A00456:223:HMMCCDSXX:3:2473:30725:32972	gnl|BL_ORD_ID|0	100	150	0	0	96	245	1653	44	96	245	150
A00456:223:HMMCCDSXX:3:1211:17246:33113	gnl|BL_ORD_ID|0	100	150	0	0	97	246	1654	1	97	246	150
A00456:223:HMMCCDSXX:3:2110:8757:5603	gnl|BL_ORD_ID|0	100	150	0	0	97	246	1655	2	97	246	150
A00456:223:HMMCCDSXX:3:1154:13087:25692	gnl|BL_ORD_ID|0	100	150	0	0	97	246	1656	3	97	246	150
A00456:223:HMMCCDSXX:3:1154:13901:27633	gnl|BL_ORD_ID|0	100	150	0	0	97	246	1657	4	97	246	150
A00456:223:HMMCCDSXX:3:2226:26033:32581	gnl|BL_ORD_ID|0	98.667	150	2	0	97	246	1658	5	97	246	150
A00456:223:HMMCCDSXX:3:1107:12943:9909	gnl|BL_ORD_ID|0	100	150	0	0	97	246	1659	6	97	246	150
A00456:223:HMMCCDSXX:3:2318:18683:27618	gnl|BL_ORD_ID|0	99.333	150	1	0	97	246	1660	7	97	246	150
A00456:223:HMMCCDSXX:3:2654:28646:28213	gnl|BL_ORD_ID|0	100	150	0	0	97	246	1661	8	97	246	150
A00456:223:HMMCCDSXX:3:1101:13395:7529	gnl|BL_ORD_ID|0	100	150	0	0	98	247	1662	1	98	247	150
A00456:223:HMMCCDSXX:3:1108:9227:28839	gnl|BL_ORD_ID|0	100	150	0	0	98	247	1663	2	98	247	150
A00456:223:HMMCCDSXX:3:1116:19443:31970	gnl|BL_ORD_ID|0	99.333	150	1	0	98	247	1664	3	98	247	150
A00456:223:HMMCCDSXX:3:1158:2609:12900	gnl|BL_ORD_ID|0	100	150	0	0	98	247	1665	4	98	247	150
A00456:223:HMMCCDSXX:3:1206:18005:26506	gnl|BL_ORD_ID|0	100	150	0	0	98	247	1666	5	98	247	150
A00456:223:HMMCCDSXX:3:1305:6262:32941	gnl|BL_ORD_ID|0	100	150	0	0	98	247	1667	6	98	247	150
A00456:223:HMMCCDSXX:3:1339:29668:32174	gnl|BL_ORD_ID|0	100	150	0	0	98	247	1668	7	98	247	150
A00456:223:HMMCCDSXX:3:1417:1642:34648	gnl|BL_ORD_ID|0	99.333	150	1	0	98	247	1669	8	98	247	150
A00456:223:HMMCCDSXX:3:1417:1949:36057	gnl|BL_ORD_ID|0	100	150	0	0	98	247	1670	9	98	247	150
A00456:223:HMMCCDSXX:3:1449:5394:8140	gnl|BL_ORD_ID|0	100	150	0	0	98	247	1671	10	98	247	150
A00456:223:HMMCCDSXX:3:1520:15619:7905	gnl|BL_ORD_ID|0	99.333	150	1	0	98	247	1672	11	98	247	150
A00456:223:HMMCCDSXX:3:1528:8883:5102	gnl|BL_ORD_ID|0	100	150	0	0	98	247	1673	12	98	247	150
A00456:223:HMMCCDSXX:3:1540:3224:12273	gnl|BL_ORD_ID|0	100	150	0	0	98	247	1674	13	98	247	150
A00456:223:HMMCCDSXX:3:1546:26729:32471	gnl|BL_ORD_ID|0	100	150	0	0	98	247	1675	14	98	247	150
A00456:223:HMMCCDSXX:3:1654:7862:28667	gnl|BL_ORD_ID|0	100	150	0	0	98	247	1676	15	98	247	150
A00456:223:HMMCCDSXX:3:2107:31141:34945	gnl|BL_ORD_ID|0	100	150	0	0	98	247	1677	16	98	247	150
A00456:223:HMMCCDSXX:3:2121:22516:12054	gnl|BL_ORD_ID|0	100	150	0	0	98	247	1678	17	98	247	150
A00456:223:HMMCCDSXX:3:2218:30743:32095	gnl|BL_ORD_ID|0	100	150	0	0	98	247	1679	18	98	247	150
A00456:223:HMMCCDSXX:3:2232:29243:21825	gnl|BL_ORD_ID|0	100	150	0	0	98	247	1680	19	98	247	150
A00456:223:HMMCCDSXX:3:2253:27199:23610	gnl|BL_ORD_ID|0	100	150	0	0	98	247	1681	20	98	247	150
A00456:223:HMMCCDSXX:3:2566:22535:12242	gnl|BL_ORD_ID|0	100	150	0	0	98	247	1682	21	98	247	150
A00456:223:HMMCCDSXX:3:2577:24044:20118	gnl|BL_ORD_ID|0	100	150	0	0	98	247	1683	22	98	247	150
A00456:223:HMMCCDSXX:3:2617:21649:1658	gnl|BL_ORD_ID|0	100	150	0	0	98	247	1684	23	98	247	150
A00456:223:HMMCCDSXX:3:2648:6424:4288	gnl|BL_ORD_ID|0	100	150	0	0	98	247	1685	24	98	247	150
A00456:223:HMMCCDSXX:3:1135:29469:31767	gnl|BL_ORD_ID|0	100	150	0	0	98	247	1686	25	98	247	150
A00456:223:HMMCCDSXX:3:1166:29197:32268	gnl|BL_ORD_ID|0	100	150	0	0	98	247	1687	26	98	247	150
A00456:223:HMMCCDSXX:3:1202:25970:20635	gnl|BL_ORD_ID|0	100	150	0	0	98	247	1688	27	98	247	150
A00456:223:HMMCCDSXX:3:1215:12698:28025	gnl|BL_ORD_ID|0	100	150	0	0	98	247	1689	28	98	247	150
A00456:223:HMMCCDSXX:3:1433:29062:16219	gnl|BL_ORD_ID|0	100	150	0	0	98	247	1690	29	98	247	150
A00456:223:HMMCCDSXX:3:1435:29930:35227	gnl|BL_ORD_ID|0	100	150	0	0	98	247	1691	30	98	247	150
A00456:223:HMMCCDSXX:3:1557:16143:19022	gnl|BL_ORD_ID|0	100	150	0	0	98	247	1692	31	98	247	150
A00456:223:HMMCCDSXX:3:1612:14290:29434	gnl|BL_ORD_ID|0	100	150	0	0	98	247	1693	32	98	247	150
A00456:223:HMMCCDSXX:3:1638:18765:10848	gnl|BL_ORD_ID|0	100	150	0	0	98	247	1694	33	98	247	150
A00456:223:HMMCCDSXX:3:1638:18828:11240	gnl|BL_ORD_ID|0	100	150	0	0	98	247	1695	34	98	247	150
A00456:223:HMMCCDSXX:3:2106:18358:6605	gnl|BL_ORD_ID|0	100	150	0	0	98	247	1696	35	98	247	150
A00456:223:HMMCCDSXX:3:2124:9950:24267	gnl|BL_ORD_ID|0	100	150	0	0	98	247	1697	36	98	247	150
A00456:223:HMMCCDSXX:3:2244:22670:15546	gnl|BL_ORD_ID|0	100	150	0	0	98	247	1698	37	98	247	150
A00456:223:HMMCCDSXX:3:2249:8088:31281	gnl|BL_ORD_ID|0	100	150	0	0	98	247	1699	38	98	247	150
A00456:223:HMMCCDSXX:3:2456:2302:33379	gnl|BL_ORD_ID|0	100	150	0	0	98	247	1700	39	98	247	150
A00456:223:HMMCCDSXX:3:2462:18304:12117	gnl|BL_ORD_ID|0	100	150	0	0	98	247	1701	40	98	247	150
A00456:223:HMMCCDSXX:3:2504:29315:21825	gnl|BL_ORD_ID|0	100	150	0	0	98	247	1702	41	98	247	150
A00456:223:HMMCCDSXX:3:2612:25536:10175	gnl|BL_ORD_ID|0	100	150	0	0	98	247	1703	42	98	247	150
A00456:223:HMMCCDSXX:3:2624:8440:12352	gnl|BL_ORD_ID|0	100	150	0	0	98	247	1704	43	98	247	150
A00456:223:HMMCCDSXX:3:1307:12310:1141	gnl|BL_ORD_ID|0	100	149	0	0	98	246	1705	44	98	246	149
A00456:223:HMMCCDSXX:3:1505:10574:32362	gnl|BL_ORD_ID|0	100	147	0	0	98	244	1706	45	98	244	147
A00456:223:HMMCCDSXX:3:2372:19651:9972	gnl|BL_ORD_ID|0	100	150	0	0	98	247	1707	46	98	247	150
A00456:223:HMMCCDSXX:3:2635:12020:12446	gnl|BL_ORD_ID|0	100	150	0	0	98	247	1708	47	98	247	150
A00456:223:HMMCCDSXX:3:1419:1470:16125	gnl|BL_ORD_ID|0	100	150	0	0	99	248	1709	1	99	248	150
A00456:223:HMMCCDSXX:3:2314:30581:9111	gnl|BL_ORD_ID|0	100	150	0	0	99	248	1710	2	99	248	150
A00456:223:HMMCCDSXX:3:2404:14787:1141	gnl|BL_ORD_ID|0	100	150	0	0	99	248	1711	3	99	248	150
A00456:223:HMMCCDSXX:3:2553:22046:4069	gnl|BL_ORD_ID|0	100	150	0	0	99	248	1712	4	99	248	150
A00456:223:HMMCCDSXX:3:1258:5828:16094	gnl|BL_ORD_ID|0	98	150	3	0	99	248	1713	5	99	248	150
A00456:223:HMMCCDSXX:3:2149:17788:29951	gnl|BL_ORD_ID|0	100	150	0	0	99	248	1714	6	99	248	150
A00456:223:HMMCCDSXX:3:2412:15609:4820	gnl|BL_ORD_ID|0	100	150	0	0	99	248	1715	7	99	248	150
A00456:223:HMMCCDSXX:3:2445:4001:35916	gnl|BL_ORD_ID|0	100	150	0	0	99	248	1716	8	99	248	150
A00456:223:HMMCCDSXX:3:1103:19217:25473	gnl|BL_ORD_ID|0	100	149	0	0	99	247	1717	9	99	247	149
A00456:223:HMMCCDSXX:3:2563:31973:4758	gnl|BL_ORD_ID|0	100	148	0	0	99	246	1718	10	99	246	148
A00456:223:HMMCCDSXX:3:1574:32371:11710	gnl|BL_ORD_ID|0	100	150	0	0	99	248	1719	11	99	248	150
A00456:223:HMMCCDSXX:3:1302:23900:23156	gnl|BL_ORD_ID|0	100	150	0	0	99	248	1720	12	99	248	150
A00456:223:HMMCCDSXX:3:1617:8820:32299	gnl|BL_ORD_ID|0	99.333	150	1	0	99	248	1721	13	99	248	150
A00456:223:HMMCCDSXX:3:2306:24912:4116	gnl|BL_ORD_ID|0	100	150	0	0	99	248	1722	14	99	248	150
A00456:223:HMMCCDSXX:3:2205:2691:14826	gnl|BL_ORD_ID|0	99.338	151	1	1	100	250	1723	1	100	250	151
A00456:223:HMMCCDSXX:3:1130:4860:23970	gnl|BL_ORD_ID|0	98.667	150	2	0	100	249	1724	2	100	249	150
A00456:223:HMMCCDSXX:3:1270:23728:14559	gnl|BL_ORD_ID|0	99.333	150	1	0	100	249	1725	3	100	249	150
A00456:223:HMMCCDSXX:3:1328:31015:35164	gnl|BL_ORD_ID|0	100	150	0	0	100	249	1726	4	100	249	150
A00456:223:HMMCCDSXX:3:1347:12427:29403	gnl|BL_ORD_ID|0	100	150	0	0	100	249	1727	5	100	249	150
A00456:223:HMMCCDSXX:3:1419:8576:23735	gnl|BL_ORD_ID|0	100	150	0	0	100	249	1728	6	100	249	150
A00456:223:HMMCCDSXX:3:1450:1253:35697	gnl|BL_ORD_ID|0	100	150	0	0	100	249	1729	7	100	249	150
A00456:223:HMMCCDSXX:3:1514:19407:1282	gnl|BL_ORD_ID|0	100	150	0	0	100	249	1730	8	100	249	150
A00456:223:HMMCCDSXX:3:1514:19488:1454	gnl|BL_ORD_ID|0	100	150	0	0	100	249	1731	9	100	249	150
A00456:223:HMMCCDSXX:3:1545:18059:7999	gnl|BL_ORD_ID|0	100	150	0	0	100	249	1732	10	100	249	150
A00456:223:HMMCCDSXX:3:1551:18186:13604	gnl|BL_ORD_ID|0	100	150	0	0	100	249	1733	11	100	249	150
A00456:223:HMMCCDSXX:3:1571:24153:9189	gnl|BL_ORD_ID|0	100	150	0	0	100	249	1734	12	100	249	150
A00456:223:HMMCCDSXX:3:1572:16721:21433	gnl|BL_ORD_ID|0	100	150	0	0	100	249	1735	13	100	249	150
A00456:223:HMMCCDSXX:3:1604:1054:25801	gnl|BL_ORD_ID|0	100	150	0	0	100	249	1736	14	100	249	150
A00456:223:HMMCCDSXX:3:1653:8612:17190	gnl|BL_ORD_ID|0	100	150	0	0	100	249	1737	15	100	249	150
A00456:223:HMMCCDSXX:3:2124:27434:27555	gnl|BL_ORD_ID|0	100	150	0	0	100	249	1738	16	100	249	150
A00456:223:HMMCCDSXX:3:2144:19551:27680	gnl|BL_ORD_ID|0	100	150	0	0	100	249	1739	17	100	249	150
A00456:223:HMMCCDSXX:3:2265:13548:24674	gnl|BL_ORD_ID|0	100	150	0	0	100	249	1740	18	100	249	150
A00456:223:HMMCCDSXX:3:2312:6777:16360	gnl|BL_ORD_ID|0	100	150	0	0	100	249	1741	19	100	249	150
A00456:223:HMMCCDSXX:3:2424:27082:24283	gnl|BL_ORD_ID|0	100	150	0	0	100	249	1742	20	100	249	150
A00456:223:HMMCCDSXX:3:2429:28366:27414	gnl|BL_ORD_ID|0	100	150	0	0	100	249	1743	21	100	249	150
A00456:223:HMMCCDSXX:3:2473:30725:32972	gnl|BL_ORD_ID|0	100	150	0	0	100	249	1744	22	100	249	150
A00456:223:HMMCCDSXX:3:2545:2953:17848	gnl|BL_ORD_ID|0	99.333	150	1	0	100	249	1745	23	100	249	150
A00456:223:HMMCCDSXX:3:2568:21667:26772	gnl|BL_ORD_ID|0	94	150	9	0	100	249	1746	24	100	249	150
A00456:223:HMMCCDSXX:3:2568:23249:28228	gnl|BL_ORD_ID|0	100	150	0	0	100	249	1747	25	100	249	150
A00456:223:HMMCCDSXX:3:1126:31846:27618	gnl|BL_ORD_ID|0	100	150	0	0	100	249	1748	26	100	249	150
A00456:223:HMMCCDSXX:3:1126:31575:30780	gnl|BL_ORD_ID|0	100	150	0	0	100	249	1749	27	100	249	150
A00456:223:HMMCCDSXX:3:1371:32958:17237	gnl|BL_ORD_ID|0	100	150	0	0	100	249	1750	28	100	249	150
A00456:223:HMMCCDSXX:3:1537:25934:8077	gnl|BL_ORD_ID|0	100	150	0	0	100	249	1751	29	100	249	150
A00456:223:HMMCCDSXX:3:1556:5737:18693	gnl|BL_ORD_ID|0	96	150	6	0	100	249	1752	30	100	249	150
A00456:223:HMMCCDSXX:3:1609:9968:10081	gnl|BL_ORD_ID|0	99.333	150	1	0	100	249	1753	31	100	249	150
A00456:223:HMMCCDSXX:3:2133:11415:7138	gnl|BL_ORD_ID|0	96.667	150	5	0	100	249	1754	32	100	249	150
A00456:223:HMMCCDSXX:3:2150:12463:31031	gnl|BL_ORD_ID|0	99.333	150	1	0	100	249	1755	33	100	249	150
A00456:223:HMMCCDSXX:3:2212:16206:8359	gnl|BL_ORD_ID|0	100	150	0	0	100	249	1756	34	100	249	150
A00456:223:HMMCCDSXX:3:2249:26874:28244	gnl|BL_ORD_ID|0	100	150	0	0	100	249	1757	35	100	249	150
A00456:223:HMMCCDSXX:3:2315:10719:10755	gnl|BL_ORD_ID|0	100	150	0	0	100	249	1758	36	100	249	150
A00456:223:HMMCCDSXX:3:2322:31042:26537	gnl|BL_ORD_ID|0	100	150	0	0	100	249	1759	37	100	249	150
A00456:223:HMMCCDSXX:3:2340:13105:5776	gnl|BL_ORD_ID|0	100	150	0	0	100	249	1760	38	100	249	150
A00456:223:HMMCCDSXX:3:2426:15483:18693	gnl|BL_ORD_ID|0	100	150	0	0	100	249	1761	39	100	249	150
A00456:223:HMMCCDSXX:3:2427:4896:16391	gnl|BL_ORD_ID|0	100	150	0	0	100	249	1762	40	100	249	150
A00456:223:HMMCCDSXX:3:2501:2428:13683	gnl|BL_ORD_ID|0	99.333	150	1	0	100	249	1763	41	100	249	150
A00456:223:HMMCCDSXX:3:2509:10321:3364	gnl|BL_ORD_ID|0	100	150	0	0	100	249	1764	42	100	249	150
A00456:223:HMMCCDSXX:3:2537:9805:29309	gnl|BL_ORD_ID|0	100	150	0	0	100	249	1765	43	100	249	150
A00456:223:HMMCCDSXX:3:2663:12644:19852	gnl|BL_ORD_ID|0	100	148	0	0	100	247	1766	44	100	247	148
A00456:223:HMMCCDSXX:3:2567:4417:11992	gnl|BL_ORD_ID|0	100	147	0	0	100	246	1767	45	100	246	147
A00456:223:HMMCCDSXX:3:2150:12463:31031	gnl|BL_ORD_ID|0	99.333	150	1	0	100	249	1768	46	100	249	150
A00456:223:HMMCCDSXX:3:1124:23421:8703	gnl|BL_ORD_ID|0	100	150	0	0	101	250	1769	1	101	250	150
A00456:223:HMMCCDSXX:3:1213:7310:28432	gnl|BL_ORD_ID|0	96.667	150	5	0	101	250	1770	2	101	250	150
A00456:223:HMMCCDSXX:3:1223:15600:11443	gnl|BL_ORD_ID|0	100	150	0	0	101	250	1771	3	101	250	150
A00456:223:HMMCCDSXX:3:1226:17427:7091	gnl|BL_ORD_ID|0	100	150	0	0	101	250	1772	4	101	250	150
A00456:223:HMMCCDSXX:3:1242:30590:18928	gnl|BL_ORD_ID|0	100	150	0	0	101	250	1773	5	101	250	150
A00456:223:HMMCCDSXX:3:1341:20464:14606	gnl|BL_ORD_ID|0	100	150	0	0	101	250	1774	6	101	250	150
A00456:223:HMMCCDSXX:3:1342:15835:20369	gnl|BL_ORD_ID|0	99.333	150	1	0	101	250	1775	7	101	250	150
A00456:223:HMMCCDSXX:3:1345:10746:35603	gnl|BL_ORD_ID|0	94	150	9	0	101	250	1776	8	101	250	150
A00456:223:HMMCCDSXX:3:1369:20039:14747	gnl|BL_ORD_ID|0	100	150	0	0	101	250	1777	9	101	250	150
A00456:223:HMMCCDSXX:3:1372:30617:6386	gnl|BL_ORD_ID|0	100	150	0	0	101	250	1778	10	101	250	150
A00456:223:HMMCCDSXX:3:1402:28583:35211	gnl|BL_ORD_ID|0	100	150	0	0	101	250	1779	11	101	250	150
A00456:223:HMMCCDSXX:3:1407:14308:1626	gnl|BL_ORD_ID|0	100	150	0	0	101	250	1780	12	101	250	150
A00456:223:HMMCCDSXX:3:1412:26657:23234	gnl|BL_ORD_ID|0	100	150	0	0	101	250	1781	13	101	250	150
A00456:223:HMMCCDSXX:3:1422:12246:15342	gnl|BL_ORD_ID|0	100	150	0	0	101	250	1782	14	101	250	150
A00456:223:HMMCCDSXX:3:1457:12680:22138	gnl|BL_ORD_ID|0	100	150	0	0	101	250	1783	15	101	250	150
A00456:223:HMMCCDSXX:3:1459:21269:16031	gnl|BL_ORD_ID|0	100	150	0	0	101	250	1784	16	101	250	150
A00456:223:HMMCCDSXX:3:1509:7383:16282	gnl|BL_ORD_ID|0	100	150	0	0	101	250	1785	17	101	250	150
A00456:223:HMMCCDSXX:3:1510:6262:35352	gnl|BL_ORD_ID|0	100	150	0	0	101	250	1786	18	101	250	150
A00456:223:HMMCCDSXX:3:1526:28194:32784	gnl|BL_ORD_ID|0	98.667	150	2	0	101	250	1787	19	101	250	150
A00456:223:HMMCCDSXX:3:1529:1199:2785	gnl|BL_ORD_ID|0	100	150	0	0	101	250	1788	20	101	250	150
A00456:223:HMMCCDSXX:3:1570:7328:17378	gnl|BL_ORD_ID|0	100	150	0	0	101	250	1789	21	101	250	150
A00456:223:HMMCCDSXX:3:1617:8820:32299	gnl|BL_ORD_ID|0	100	150	0	0	101	250	1790	22	101	250	150
A00456:223:HMMCCDSXX:3:1631:7111:12868	gnl|BL_ORD_ID|0	99.333	150	1	0	101	250	1791	23	101	250	150
A00456:223:HMMCCDSXX:3:1635:29116:11303	gnl|BL_ORD_ID|0	100	150	0	0	101	250	1792	24	101	250	150
A00456:223:HMMCCDSXX:3:1658:9950:35697	gnl|BL_ORD_ID|0	100	150	0	0	101	250	1793	25	101	250	150
A00456:223:HMMCCDSXX:3:2114:7392:28260	gnl|BL_ORD_ID|0	100	150	0	0	101	250	1794	26	101	250	150
A00456:223:HMMCCDSXX:3:2147:31204:10942	gnl|BL_ORD_ID|0	100	150	0	0	101	250	1795	27	101	250	150
A00456:223:HMMCCDSXX:3:2173:29984:34788	gnl|BL_ORD_ID|0	100	150	0	0	101	250	1796	28	101	250	150
A00456:223:HMMCCDSXX:3:2253:4110:16063	gnl|BL_ORD_ID|0	100	150	0	0	101	250	1797	29	101	250	150
A00456:223:HMMCCDSXX:3:2253:4128:16031	gnl|BL_ORD_ID|0	100	150	0	0	101	250	1798	30	101	250	150
A00456:223:HMMCCDSXX:3:2316:10954:13072	gnl|BL_ORD_ID|0	100	150	0	0	101	250	1799	31	101	250	150
A00456:223:HMMCCDSXX:3:2338:26512:17315	gnl|BL_ORD_ID|0	100	150	0	0	101	250	1800	32	101	250	150
A00456:223:HMMCCDSXX:3:2345:3287:17769	gnl|BL_ORD_ID|0	100	150	0	0	101	250	1801	33	101	250	150
A00456:223:HMMCCDSXX:3:2366:20708:28432	gnl|BL_ORD_ID|0	99.333	150	1	0	101	250	1802	34	101	250	150
A00456:223:HMMCCDSXX:3:2422:18647:26710	gnl|BL_ORD_ID|0	100	150	0	0	101	250	1803	35	101	250	150
A00456:223:HMMCCDSXX:3:2423:27670:31532	gnl|BL_ORD_ID|0	100	150	0	0	101	250	1804	36	101	250	150
A00456:223:HMMCCDSXX:3:2423:28691:31923	gnl|BL_ORD_ID|0	100	150	0	0	101	250	1805	37	101	250	150
A00456:223:HMMCCDSXX:3:2447:16776:16767	gnl|BL_ORD_ID|0	100	150	0	0	101	250	1806	38	101	250	150
A00456:223:HMMCCDSXX:3:2532:22489:34648	gnl|BL_ORD_ID|0	100	150	0	0	101	250	1807	39	101	250	150
A00456:223:HMMCCDSXX:3:2542:26910:15687	gnl|BL_ORD_ID|0	100	150	0	0	101	250	1808	40	101	250	150
A00456:223:HMMCCDSXX:3:2543:9064:6261	gnl|BL_ORD_ID|0	100	150	0	0	101	250	1809	41	101	250	150
A00456:223:HMMCCDSXX:3:2549:17228:11381	gnl|BL_ORD_ID|0	99.333	150	1	0	101	250	1810	42	101	250	150
A00456:223:HMMCCDSXX:3:2664:5909:8938	gnl|BL_ORD_ID|0	100	150	0	0	101	250	1811	43	101	250	150
A00456:223:HMMCCDSXX:3:2674:20726:4539	gnl|BL_ORD_ID|0	99.333	150	1	0	101	250	1812	44	101	250	150
A00456:223:HMMCCDSXX:3:2677:13422:6605	gnl|BL_ORD_ID|0	100	150	0	0	101	250	1813	45	101	250	150
A00456:223:HMMCCDSXX:3:1103:2718:31031	gnl|BL_ORD_ID|0	100	150	0	0	101	250	1814	46	101	250	150
A00456:223:HMMCCDSXX:3:1151:27787:23594	gnl|BL_ORD_ID|0	100	150	0	0	101	250	1815	47	101	250	150
A00456:223:HMMCCDSXX:3:1177:32407:18630	gnl|BL_ORD_ID|0	100	150	0	0	101	250	1816	48	101	250	150
A00456:223:HMMCCDSXX:3:1178:18647:7827	gnl|BL_ORD_ID|0	98.667	150	2	0	101	250	1817	49	101	250	150
A00456:223:HMMCCDSXX:3:1227:15302:18662	gnl|BL_ORD_ID|0	99.333	150	1	1	101	250	1818	50	101	250	150
A00456:223:HMMCCDSXX:3:1260:11107:22106	gnl|BL_ORD_ID|0	100	150	0	0	101	250	1819	51	101	250	150
A00456:223:HMMCCDSXX:3:1260:10655:22514	gnl|BL_ORD_ID|0	100	150	0	0	101	250	1820	52	101	250	150
A00456:223:HMMCCDSXX:3:1275:23538:10723	gnl|BL_ORD_ID|0	100	150	0	0	101	250	1821	53	101	250	150
A00456:223:HMMCCDSXX:3:1275:27561:18349	gnl|BL_ORD_ID|0	100	150	0	0	101	250	1822	54	101	250	150
A00456:223:HMMCCDSXX:3:1351:6470:33426	gnl|BL_ORD_ID|0	100	150	0	0	101	250	1823	55	101	250	150
A00456:223:HMMCCDSXX:3:1355:4291:30624	gnl|BL_ORD_ID|0	100	150	0	0	101	250	1824	56	101	250	150
A00456:223:HMMCCDSXX:3:1359:25961:3521	gnl|BL_ORD_ID|0	99.333	150	1	0	101	250	1825	57	101	250	150
A00456:223:HMMCCDSXX:3:1362:4399:34100	gnl|BL_ORD_ID|0	100	150	0	0	101	250	1826	58	101	250	150
A00456:223:HMMCCDSXX:3:1415:10691:16094	gnl|BL_ORD_ID|0	100	150	0	0	101	250	1827	59	101	250	150
A00456:223:HMMCCDSXX:3:1435:28700:13275	gnl|BL_ORD_ID|0	100	150	0	0	101	250	1828	60	101	250	150
A00456:223:HMMCCDSXX:3:1450:20193:6872	gnl|BL_ORD_ID|0	96	150	6	0	101	250	1829	61	101	250	150
A00456:223:HMMCCDSXX:3:1523:21486:12555	gnl|BL_ORD_ID|0	100	150	0	0	101	250	1830	62	101	250	150
A00456:223:HMMCCDSXX:3:1568:21974:20635	gnl|BL_ORD_ID|0	100	150	0	0	101	250	1831	63	101	250	150
A00456:223:HMMCCDSXX:3:1568:5728:35556	gnl|BL_ORD_ID|0	100	150	0	0	101	250	1832	64	101	250	150
A00456:223:HMMCCDSXX:3:1574:32371:11710	gnl|BL_ORD_ID|0	100	150	0	0	101	250	1833	65	101	250	150
A00456:223:HMMCCDSXX:3:1601:31105:20165	gnl|BL_ORD_ID|0	100	150	0	0	101	250	1834	66	101	250	150
A00456:223:HMMCCDSXX:3:1613:17192:26475	gnl|BL_ORD_ID|0	100	150	0	0	101	250	1835	67	101	250	150
A00456:223:HMMCCDSXX:3:1666:14371:23531	gnl|BL_ORD_ID|0	100	150	0	0	101	250	1836	68	101	250	150
A00456:223:HMMCCDSXX:3:2146:9796:27352	gnl|BL_ORD_ID|0	100	150	0	0	101	250	1837	69	101	250	150
A00456:223:HMMCCDSXX:3:2146:9390:27680	gnl|BL_ORD_ID|0	100	150	0	0	101	250	1838	70	101	250	150
A00456:223:HMMCCDSXX:3:2153:22037:7341	gnl|BL_ORD_ID|0	100	150	0	0	101	250	1839	71	101	250	150
A00456:223:HMMCCDSXX:3:2170:7030:21183	gnl|BL_ORD_ID|0	100	150	0	0	101	250	1840	72	101	250	150
A00456:223:HMMCCDSXX:3:2252:23457:7545	gnl|BL_ORD_ID|0	100	150	0	0	101	250	1841	73	101	250	150
A00456:223:HMMCCDSXX:3:2276:12680:34632	gnl|BL_ORD_ID|0	100	150	0	0	101	250	1842	74	101	250	150
A00456:223:HMMCCDSXX:3:2276:12897:34882	gnl|BL_ORD_ID|0	100	150	0	0	101	250	1843	75	101	250	150
A00456:223:HMMCCDSXX:3:2355:18864:25614	gnl|BL_ORD_ID|0	100	150	0	0	101	250	1844	76	101	250	150
A00456:223:HMMCCDSXX:3:2371:27272:28620	gnl|BL_ORD_ID|0	99.333	150	1	0	101	250	1845	77	101	250	150
A00456:223:HMMCCDSXX:3:2454:24596:28244	gnl|BL_ORD_ID|0	100	150	0	0	101	250	1846	78	101	250	150
A00456:223:HMMCCDSXX:3:2454:25699:29340	gnl|BL_ORD_ID|0	100	150	0	0	101	250	1847	79	101	250	150
A00456:223:HMMCCDSXX:3:2456:9552:17879	gnl|BL_ORD_ID|0	100	150	0	0	101	250	1848	80	101	250	150
A00456:223:HMMCCDSXX:3:2456:9941:18552	gnl|BL_ORD_ID|0	100	150	0	0	101	250	1849	81	101	250	150
A00456:223:HMMCCDSXX:3:2457:8648:23171	gnl|BL_ORD_ID|0	100	150	0	0	101	250	1850	82	101	250	150
A00456:223:HMMCCDSXX:3:2478:4770:27445	gnl|BL_ORD_ID|0	100	150	0	0	101	250	1851	83	101	250	150
A00456:223:HMMCCDSXX:3:2501:16486:25066	gnl|BL_ORD_ID|0	100	150	0	0	101	250	1852	84	101	250	150
A00456:223:HMMCCDSXX:3:2508:23041:11898	gnl|BL_ORD_ID|0	100	150	0	0	101	250	1853	85	101	250	150
A00456:223:HMMCCDSXX:3:2529:9787:35258	gnl|BL_ORD_ID|0	100	150	0	0	101	250	1854	86	101	250	150
A00456:223:HMMCCDSXX:3:2536:31801:19398	gnl|BL_ORD_ID|0	100	150	0	0	101	250	1855	87	101	250	150
A00456:223:HMMCCDSXX:3:2571:1750:23844	gnl|BL_ORD_ID|0	100	150	0	0	101	250	1856	88	101	250	150
A00456:223:HMMCCDSXX:3:2577:7229:1830	gnl|BL_ORD_ID|0	100	150	0	0	101	250	1857	89	101	250	150
A00456:223:HMMCCDSXX:3:2614:26214:12821	gnl|BL_ORD_ID|0	100	150	0	0	101	250	1858	90	101	250	150
A00456:223:HMMCCDSXX:3:2639:5195:11553	gnl|BL_ORD_ID|0	100	150	0	0	101	250	1859	91	101	250	150
A00456:223:HMMCCDSXX:3:2670:23457:34037	gnl|BL_ORD_ID|0	100	150	0	0	101	250	1860	92	101	250	150
A00456:223:HMMCCDSXX:3:2676:28122:15718	gnl|BL_ORD_ID|0	99.333	150	1	0	101	250	1861	93	101	250	150
A00456:223:HMMCCDSXX:3:2512:21386:32487	gnl|BL_ORD_ID|0	98.658	149	2	0	101	249	1862	94	101	249	149
A00456:223:HMMCCDSXX:3:1672:12020:27038	gnl|BL_ORD_ID|0	100	149	0	0	101	249	1863	95	101	249	149
A00456:223:HMMCCDSXX:3:1154:26765:2754	gnl|BL_ORD_ID|0	99.32	147	1	0	101	247	1864	96	101	247	147
A00456:223:HMMCCDSXX:3:2316:10954:13072	gnl|BL_ORD_ID|0	100	150	0	0	101	250	1865	97	101	250	150
A00456:223:HMMCCDSXX:3:1453:11614:3192	gnl|BL_ORD_ID|0	100	150	0	0	102	251	1866	1	102	251	150
A00456:223:HMMCCDSXX:3:2310:4906:33567	gnl|BL_ORD_ID|0	99.333	150	1	0	102	251	1867	2	102	251	150
A00456:223:HMMCCDSXX:3:1615:4562:16407	gnl|BL_ORD_ID|0	100	149	0	0	102	250	1868	3	102	250	149
A00456:223:HMMCCDSXX:3:1665:3604:6668	gnl|BL_ORD_ID|0	100	149	0	0	102	250	1869	4	102	250	149
A00456:223:HMMCCDSXX:3:2227:27606:6965	gnl|BL_ORD_ID|0	100	149	0	0	102	250	1870	5	102	250	149
A00456:223:HMMCCDSXX:3:1340:29423:28401	gnl|BL_ORD_ID|0	100	149	0	0	102	250	1871	6	102	250	149
A00456:223:HMMCCDSXX:3:2512:28230:18317	gnl|BL_ORD_ID|0	100	149	0	0	102	250	1872	7	102	250	149
A00456:223:HMMCCDSXX:3:2512:29125:18615	gnl|BL_ORD_ID|0	100	149	0	0	102	250	1873	8	102	250	149
A00456:223:HMMCCDSXX:3:2531:18439:33646	gnl|BL_ORD_ID|0	99.329	149	1	0	102	250	1874	9	102	250	149
A00456:223:HMMCCDSXX:3:2321:14353:23187	gnl|BL_ORD_ID|0	100	146	0	0	102	247	1875	10	102	247	146
A00456:223:HMMCCDSXX:3:2346:10041:25394	gnl|BL_ORD_ID|0	100	150	0	0	102	251	1876	11	102	251	150
A00456:223:HMMCCDSXX:3:1525:4246:36025	gnl|BL_ORD_ID|0	100	150	0	0	102	251	1877	12	102	251	150
A00456:223:HMMCCDSXX:3:1645:21386:6433	gnl|BL_ORD_ID|0	100	150	0	0	103	252	1878	1	103	252	150
A00456:223:HMMCCDSXX:3:1645:20012:7686	gnl|BL_ORD_ID|0	100	150	0	0	103	252	1879	2	103	252	150
A00456:223:HMMCCDSXX:3:1668:2609:28181	gnl|BL_ORD_ID|0	100	150	0	0	103	252	1880	3	103	252	150
A00456:223:HMMCCDSXX:3:2217:12915:25081	gnl|BL_ORD_ID|0	100	150	0	0	103	252	1881	4	103	252	150
A00456:223:HMMCCDSXX:3:2537:9326:33520	gnl|BL_ORD_ID|0	100	150	0	0	103	252	1882	5	103	252	150
A00456:223:HMMCCDSXX:3:2611:5611:6010	gnl|BL_ORD_ID|0	99.333	150	1	0	103	252	1883	6	103	252	150
A00456:223:HMMCCDSXX:3:2676:13214:8030	gnl|BL_ORD_ID|0	100	150	0	0	103	252	1884	7	103	252	150
A00456:223:HMMCCDSXX:3:1441:15221:24158	gnl|BL_ORD_ID|0	100	150	0	0	103	252	1885	8	103	252	150
A00456:223:HMMCCDSXX:3:2306:16794:5149	gnl|BL_ORD_ID|0	100	150	0	0	103	252	1886	9	103	252	150
A00456:223:HMMCCDSXX:3:2662:8097:29794	gnl|BL_ORD_ID|0	100	150	0	0	103	252	1887	10	103	252	150
A00456:223:HMMCCDSXX:3:1105:25843:32252	gnl|BL_ORD_ID|0	100	149	0	0	103	251	1888	11	103	251	149
A00456:223:HMMCCDSXX:3:1176:2899:26083	gnl|BL_ORD_ID|0	100	149	0	0	103	251	1889	12	103	251	149
A00456:223:HMMCCDSXX:3:1337:30463:9314	gnl|BL_ORD_ID|0	100	149	0	0	103	251	1890	13	103	251	149
A00456:223:HMMCCDSXX:3:1421:12274:11443	gnl|BL_ORD_ID|0	100	149	0	0	103	251	1891	14	103	251	149
A00456:223:HMMCCDSXX:3:1440:19090:19680	gnl|BL_ORD_ID|0	100	149	0	0	103	251	1892	15	103	251	149
A00456:223:HMMCCDSXX:3:1466:3242:23422	gnl|BL_ORD_ID|0	100	149	0	0	103	251	1893	16	103	251	149
A00456:223:HMMCCDSXX:3:1522:17354:33207	gnl|BL_ORD_ID|0	100	149	0	0	103	251	1894	17	103	251	149
A00456:223:HMMCCDSXX:3:1533:13358:23062	gnl|BL_ORD_ID|0	100	149	0	0	103	251	1895	18	103	251	149
A00456:223:HMMCCDSXX:3:1634:15854:8750	gnl|BL_ORD_ID|0	100	149	0	0	103	251	1896	19	103	251	149
A00456:223:HMMCCDSXX:3:1634:14208:9377	gnl|BL_ORD_ID|0	100	149	0	0	103	251	1897	20	103	251	149
A00456:223:HMMCCDSXX:3:2101:4273:13275	gnl|BL_ORD_ID|0	100	149	0	0	103	251	1898	21	103	251	149
A00456:223:HMMCCDSXX:3:2105:28935:27993	gnl|BL_ORD_ID|0	100	149	0	0	103	251	1899	22	103	251	149
A00456:223:HMMCCDSXX:3:2144:4146:17910	gnl|BL_ORD_ID|0	100	149	0	0	103	251	1900	23	103	251	149
A00456:223:HMMCCDSXX:3:2225:12084:34225	gnl|BL_ORD_ID|0	100	149	0	0	103	251	1901	24	103	251	149
A00456:223:HMMCCDSXX:3:2251:12138:7764	gnl|BL_ORD_ID|0	100	149	0	0	103	251	1902	25	103	251	149
A00456:223:HMMCCDSXX:3:2327:4472:34507	gnl|BL_ORD_ID|0	100	149	0	0	103	251	1903	26	103	251	149
A00456:223:HMMCCDSXX:3:2348:28863:29277	gnl|BL_ORD_ID|0	100	149	0	0	103	251	1904	27	103	251	149
A00456:223:HMMCCDSXX:3:2372:19651:9972	gnl|BL_ORD_ID|0	100	149	0	0	103	251	1905	28	103	251	149
A00456:223:HMMCCDSXX:3:2646:17716:7498	gnl|BL_ORD_ID|0	100	149	0	0	103	251	1906	29	103	251	149
A00456:223:HMMCCDSXX:3:1107:12943:9909	gnl|BL_ORD_ID|0	100	149	0	0	103	251	1907	30	103	251	149
A00456:223:HMMCCDSXX:3:1115:19388:7200	gnl|BL_ORD_ID|0	100	149	0	0	103	251	1908	31	103	251	149
A00456:223:HMMCCDSXX:3:1115:19515:7294	gnl|BL_ORD_ID|0	100	149	0	0	103	251	1909	32	103	251	149
A00456:223:HMMCCDSXX:3:1121:16025:29684	gnl|BL_ORD_ID|0	100	149	0	0	103	251	1910	33	103	251	149
A00456:223:HMMCCDSXX:3:1335:23204:5509	gnl|BL_ORD_ID|0	100	149	0	0	103	251	1911	34	103	251	149
A00456:223:HMMCCDSXX:3:1374:28248:7889	gnl|BL_ORD_ID|0	100	149	0	0	103	251	1912	35	103	251	149
A00456:223:HMMCCDSXX:3:1414:7817:23547	gnl|BL_ORD_ID|0	100	149	0	0	103	251	1913	36	103	251	149
A00456:223:HMMCCDSXX:3:1452:24650:27868	gnl|BL_ORD_ID|0	100	149	0	0	103	251	1914	37	103	251	149
A00456:223:HMMCCDSXX:3:1662:5014:12179	gnl|BL_ORD_ID|0	100	149	0	0	103	251	1915	38	103	251	149
A00456:223:HMMCCDSXX:3:2137:2962:14450	gnl|BL_ORD_ID|0	100	149	0	0	103	251	1916	39	103	251	149
A00456:223:HMMCCDSXX:3:2273:27950:1360	gnl|BL_ORD_ID|0	100	149	0	0	103	251	1917	40	103	251	149
A00456:223:HMMCCDSXX:3:2361:27082:5431	gnl|BL_ORD_ID|0	100	149	0	0	103	251	1918	41	103	251	149
A00456:223:HMMCCDSXX:3:2410:26883:21339	gnl|BL_ORD_ID|0	100	149	0	0	103	251	1919	42	103	251	149
A00456:223:HMMCCDSXX:3:2412:17942:9142	gnl|BL_ORD_ID|0	100	149	0	0	103	251	1920	43	103	251	149
A00456:223:HMMCCDSXX:3:2428:3468:4304	gnl|BL_ORD_ID|0	100	149	0	0	103	251	1921	44	103	251	149
A00456:223:HMMCCDSXX:3:2430:3423:5822	gnl|BL_ORD_ID|0	100	149	0	0	103	251	1922	45	103	251	149
A00456:223:HMMCCDSXX:3:2445:32127:33238	gnl|BL_ORD_ID|0	100	149	0	0	103	251	1923	46	103	251	149
A00456:223:HMMCCDSXX:3:2505:24551:35149	gnl|BL_ORD_ID|0	100	149	0	0	103	251	1924	47	103	251	149
A00456:223:HMMCCDSXX:3:2508:30608:32330	gnl|BL_ORD_ID|0	100	149	0	0	103	251	1925	48	103	251	149
A00456:223:HMMCCDSXX:3:2568:30228:32299	gnl|BL_ORD_ID|0	99.329	149	1	0	103	251	1926	49	103	251	149
A00456:223:HMMCCDSXX:3:2640:25943:2362	gnl|BL_ORD_ID|0	100	149	0	0	103	251	1927	50	103	251	149
A00456:223:HMMCCDSXX:3:2668:7970:30138	gnl|BL_ORD_ID|0	100	149	0	0	103	251	1928	51	103	251	149
A00456:223:HMMCCDSXX:3:1247:28447:16282	gnl|BL_ORD_ID|0	100	148	0	0	103	250	1929	52	103	250	148
A00456:223:HMMCCDSXX:3:2635:12020:12446	gnl|BL_ORD_ID|0	100	148	0	0	103	250	1930	53	103	250	148
A00456:223:HMMCCDSXX:3:2661:7437:34695	gnl|BL_ORD_ID|0	99.324	148	1	0	103	250	1931	54	103	250	148
A00456:223:HMMCCDSXX:3:2103:6352:2942	gnl|BL_ORD_ID|0	100	148	0	0	103	250	1932	55	103	250	148
A00456:223:HMMCCDSXX:3:2411:18728:34428	gnl|BL_ORD_ID|0	100	148	0	0	103	250	1933	56	103	250	148
A00456:223:HMMCCDSXX:3:2411:18665:34569	gnl|BL_ORD_ID|0	100	148	0	0	103	250	1934	57	103	250	148
A00456:223:HMMCCDSXX:3:2448:10041:8860	gnl|BL_ORD_ID|0	100	148	0	0	103	250	1935	58	103	250	148
A00456:223:HMMCCDSXX:3:2524:17327:9862	gnl|BL_ORD_ID|0	100	148	0	0	103	250	1936	59	103	250	148
A00456:223:HMMCCDSXX:3:1452:24650:27868	gnl|BL_ORD_ID|0	100	149	0	0	103	251	1937	60	103	251	149
A00456:223:HMMCCDSXX:3:1645:21386:6433	gnl|BL_ORD_ID|0	100	150	0	0	103	252	1938	61	103	252	150
A00456:223:HMMCCDSXX:3:1645:20012:7686	gnl|BL_ORD_ID|0	100	150	0	0	103	252	1939	62	103	252	150
A00456:223:HMMCCDSXX:3:1162:3179:15013	gnl|BL_ORD_ID|0	100	150	0	0	104	253	1940	1	104	253	150
A00456:223:HMMCCDSXX:3:1341:11080:9345	gnl|BL_ORD_ID|0	100	150	0	0	104	253	1941	2	104	253	150
A00456:223:HMMCCDSXX:3:2306:24912:4116	gnl|BL_ORD_ID|0	100	150	0	0	104	253	1942	3	104	253	150
A00456:223:HMMCCDSXX:3:2651:5900:24361	gnl|BL_ORD_ID|0	98	150	3	0	104	253	1943	4	104	253	150
A00456:223:HMMCCDSXX:3:1262:22824:14810	gnl|BL_ORD_ID|0	100	150	0	0	104	253	1944	5	104	253	150
A00456:223:HMMCCDSXX:3:1465:4969:17174	gnl|BL_ORD_ID|0	99.333	150	1	0	104	253	1945	6	104	253	150
A00456:223:HMMCCDSXX:3:2654:28646:28213	gnl|BL_ORD_ID|0	100	150	0	0	104	253	1946	7	104	253	150
A00456:223:HMMCCDSXX:3:1663:18150:29700	gnl|BL_ORD_ID|0	100	149	0	0	104	252	1947	8	104	252	149
A00456:223:HMMCCDSXX:3:1554:17210:1360	gnl|BL_ORD_ID|0	100	148	0	0	104	251	1948	9	104	251	148
A00456:223:HMMCCDSXX:3:2363:32298:3568	gnl|BL_ORD_ID|0	100	148	0	0	104	251	1949	10	104	251	148
A00456:223:HMMCCDSXX:3:1125:14769:16454	gnl|BL_ORD_ID|0	100	150	0	0	104	253	1950	11	104	253	150
A00456:223:HMMCCDSXX:3:1161:16306:11443	gnl|BL_ORD_ID|0	100	150	0	0	104	253	1951	12	104	253	150
A00456:223:HMMCCDSXX:3:1255:28483:17848	gnl|BL_ORD_ID|0	100	150	0	0	104	253	1952	13	104	253	150
A00456:223:HMMCCDSXX:3:1304:17436:20384	gnl|BL_ORD_ID|0	100	150	0	0	104	253	1953	14	104	253	150
A00456:223:HMMCCDSXX:3:1304:17788:20619	gnl|BL_ORD_ID|0	100	150	0	0	104	253	1954	15	104	253	150
A00456:223:HMMCCDSXX:3:1446:4237:9580	gnl|BL_ORD_ID|0	100	150	0	0	104	253	1955	16	104	253	150
A00456:223:HMMCCDSXX:3:1525:28818:7310	gnl|BL_ORD_ID|0	99.333	150	1	0	104	253	1956	17	104	253	150
A00456:223:HMMCCDSXX:3:1624:22987:20478	gnl|BL_ORD_ID|0	100	150	0	0	104	253	1957	18	104	253	150
A00456:223:HMMCCDSXX:3:1654:22471:28980	gnl|BL_ORD_ID|0	99.333	150	1	0	104	253	1958	19	104	253	150
A00456:223:HMMCCDSXX:3:2129:9390:15562	gnl|BL_ORD_ID|0	100	150	0	0	104	253	1959	20	104	253	150
A00456:223:HMMCCDSXX:3:2163:19940:20149	gnl|BL_ORD_ID|0	100	150	0	0	104	253	1960	21	104	253	150
A00456:223:HMMCCDSXX:3:2329:6867:31767	gnl|BL_ORD_ID|0	100	150	0	0	104	253	1961	22	104	253	150
A00456:223:HMMCCDSXX:3:2512:12843:23453	gnl|BL_ORD_ID|0	100	150	0	0	104	253	1962	23	104	253	150
A00456:223:HMMCCDSXX:3:2547:3866:25316	gnl|BL_ORD_ID|0	100	150	0	0	104	253	1963	24	104	253	150
A00456:223:HMMCCDSXX:3:2606:1886:26616	gnl|BL_ORD_ID|0	100	150	0	0	104	253	1964	25	104	253	150
A00456:223:HMMCCDSXX:3:1138:20790:15295	gnl|BL_ORD_ID|0	100	150	0	0	104	253	1965	26	104	253	150
A00456:223:HMMCCDSXX:3:1138:20835:15499	gnl|BL_ORD_ID|0	100	150	0	0	104	253	1966	27	104	253	150
A00456:223:HMMCCDSXX:3:1324:3794:26819	gnl|BL_ORD_ID|0	100	150	0	0	104	253	1967	28	104	253	150
A00456:223:HMMCCDSXX:3:1324:3595:26882	gnl|BL_ORD_ID|0	100	150	0	0	104	253	1968	29	104	253	150
A00456:223:HMMCCDSXX:3:1342:2844:35978	gnl|BL_ORD_ID|0	100	150	0	0	104	253	1969	30	104	253	150
A00456:223:HMMCCDSXX:3:1414:4246:27226	gnl|BL_ORD_ID|0	100	150	0	0	104	253	1970	31	104	253	150
A00456:223:HMMCCDSXX:3:1565:29704:36746	gnl|BL_ORD_ID|0	100	150	0	0	104	253	1971	32	104	253	150
A00456:223:HMMCCDSXX:3:2123:12879:30906	gnl|BL_ORD_ID|0	100	150	0	0	104	253	1972	33	104	253	150
A00456:223:HMMCCDSXX:3:2124:12020:26757	gnl|BL_ORD_ID|0	100	150	0	0	104	253	1973	34	104	253	150
A00456:223:HMMCCDSXX:3:2213:14950:26944	gnl|BL_ORD_ID|0	100	150	0	0	104	253	1974	35	104	253	150
A00456:223:HMMCCDSXX:3:2254:27389:27539	gnl|BL_ORD_ID|0	99.333	150	1	0	104	253	1975	36	104	253	150
A00456:223:HMMCCDSXX:3:2349:11017:31000	gnl|BL_ORD_ID|0	100	150	0	0	104	253	1976	37	104	253	150
A00456:223:HMMCCDSXX:3:2355:4146:3443	gnl|BL_ORD_ID|0	100	150	0	0	104	253	1977	38	104	253	150
A00456:223:HMMCCDSXX:3:2545:5403:2519	gnl|BL_ORD_ID|0	100	150	0	0	104	253	1978	39	104	253	150
A00456:223:HMMCCDSXX:3:2668:22670:35274	gnl|BL_ORD_ID|0	99.333	150	1	0	104	253	1979	40	104	253	150
A00456:223:HMMCCDSXX:3:1127:21197:35383	gnl|BL_ORD_ID|0	99.338	151	1	1	105	255	1980	1	105	255	151
A00456:223:HMMCCDSXX:3:1539:2654:9251	gnl|BL_ORD_ID|0	100	150	0	0	105	254	1981	2	105	254	150
A00456:223:HMMCCDSXX:3:1161:16306:11443	gnl|BL_ORD_ID|0	100	149	0	0	105	253	1982	3	105	253	149
A00456:223:HMMCCDSXX:3:1624:22987:20478	gnl|BL_ORD_ID|0	100	149	0	0	105	253	1983	4	105	253	149
A00456:223:HMMCCDSXX:3:2163:19940:20149	gnl|BL_ORD_ID|0	100	149	0	0	105	253	1984	5	105	253	149
A00456:223:HMMCCDSXX:3:1150:7238:10520	gnl|BL_ORD_ID|0	100	150	0	0	105	254	1985	6	105	254	150
A00456:223:HMMCCDSXX:3:1238:25427:34726	gnl|BL_ORD_ID|0	100	150	0	0	105	254	1986	7	105	254	150
A00456:223:HMMCCDSXX:3:1242:8820:27132	gnl|BL_ORD_ID|0	100	150	0	0	105	254	1987	8	105	254	150
A00456:223:HMMCCDSXX:3:1356:27073:3975	gnl|BL_ORD_ID|0	100	150	0	0	105	254	1988	9	105	254	150
A00456:223:HMMCCDSXX:3:2417:9824:14810	gnl|BL_ORD_ID|0	100	150	0	0	105	254	1989	10	105	254	150
A00456:223:HMMCCDSXX:3:1203:21034:6417	gnl|BL_ORD_ID|0	100	150	0	0	105	254	1990	11	105	254	150
A00456:223:HMMCCDSXX:3:1604:2718:12555	gnl|BL_ORD_ID|0	100	150	0	0	105	254	1991	12	105	254	150
A00456:223:HMMCCDSXX:3:2371:1678:30044	gnl|BL_ORD_ID|0	100	150	0	0	105	254	1992	13	105	254	150
A00456:223:HMMCCDSXX:3:1248:26232:16266	gnl|BL_ORD_ID|0	99.333	150	1	0	106	255	1993	1	106	255	150
A00456:223:HMMCCDSXX:3:1644:5475:35086	gnl|BL_ORD_ID|0	100	150	0	0	106	255	1994	2	106	255	150
A00456:223:HMMCCDSXX:3:1139:1434:22952	gnl|BL_ORD_ID|0	100	148	0	0	106	253	1995	3	106	253	148
A00456:223:HMMCCDSXX:3:2368:28221:8813	gnl|BL_ORD_ID|0	97.973	148	3	0	106	253	1996	4	106	253	148
A00456:223:HMMCCDSXX:3:2240:21395:20165	gnl|BL_ORD_ID|0	100	146	0	0	106	251	1997	5	106	251	146
A00456:223:HMMCCDSXX:3:1345:16821:6668	gnl|BL_ORD_ID|0	100	150	0	0	106	255	1998	6	106	255	150
A00456:223:HMMCCDSXX:3:1544:6551:29121	gnl|BL_ORD_ID|0	100	150	0	0	106	255	1999	7	106	255	150
[truncated: 4,648 more rows]
