# Supplementary material for: Uricase-deficient rat is generated with CRISPR/Cas9 technique
Source: PeerJ. 2020 Apr 27;8:e8971. doi: 10.7717/peerj.8971 (PMC7192158; doi:10.7717/peerj.8971)
Supplement: Supplemental Information 7 [file peerj-08-8971-s007.xls]

## Sheet: figure
No.	SubjectStart	SubjectEnd	long
1	35	70	36
2	35	70	36
3	35	70	36
4	35	70	36
5	35	70	36
6	35	70	36
7	35	70	36
8	35	70	36
9	35	70	36
10	35	70	36
11	35	70	36
12	35	70	36
13	35	70	36
14	35	70	36
15	35	70	36
16	35	70	36
17	35	70	36
18	35	70	36
19	35	70	36
20	35	70	36
1	36	70	35
2	36	70	35
3	36	70	35
4	36	70	35
5	36	70	35
6	36	70	35
7	36	70	35
8	36	70	35
9	36	70	35
10	36	70	35
11	36	70	35
12	36	70	35
13	36	70	35
14	36	70	35
15	36	70	35
16	36	70	35
17	36	70	35
1	37	70	34
2	37	70	34
3	37	70	34
4	37	70	34
5	37	70	34
6	37	70	34
1	38	70	33
2	38	70	33
3	38	70	33
4	38	70	33
5	38	70	33
1	39	70	32
2	39	70	32
3	39	70	32
1	40	70	31
1	41	70	30
1	42	70	29
2	42	70	29
3	42	70	29
4	42	70	29
5	42	70	29
1	43	70	28
2	43	70	28
3	43	70	28
1	478	619	142
1	480	599	120
2	480	599	120
3	480	599	120
4	480	599	120
5	480	599	120
6	480	599	120
7	480	599	120
8	480	599	120
9	480	599	120
10	480	599	120
11	480	599	120
12	480	599	120
13	480	599	120
14	480	599	120
15	480	599	120
16	480	599	120
17	480	599	120
18	480	599	120
19	480	599	120
20	480	599	120
21	480	600	121
22	480	600	121
23	480	600	121
24	480	600	121
25	480	600	121
26	480	600	121
27	480	600	121
28	480	600	121
29	480	600	121
30	480	600	121
31	480	600	121
32	480	600	121
33	480	600	121
34	480	600	121
35	480	600	121
36	480	600	121
37	480	600	121
38	480	601	122
39	480	601	122
40	480	601	122
41	480	601	122
42	480	601	122
43	480	601	122
44	480	601	122
45	480	602	123
46	480	602	123
47	480	602	123
48	480	602	123
49	480	602	123
50	480	603	124
51	480	603	124
52	480	603	124
53	480	604	125
54	480	605	126
55	480	605	126
56	480	606	127
57	480	606	127
58	480	606	127
59	480	606	127
60	480	606	127
61	480	607	128
62	480	607	128
63	480	607	128
64	480	607	128
65	480	607	128
66	480	609	130
67	480	610	131
68	480	610	131
69	480	610	131
70	480	611	132
71	480	611	132
72	480	611	132
73	480	611	132
74	480	611	132
75	480	612	133
76	480	612	133
77	480	612	133
78	480	612	133
79	480	613	134
80	480	613	134
81	480	617	138
82	480	617	138
83	480	617	138
84	480	617	138
85	480	617	138
86	480	617	138
87	480	618	139
88	480	618	139
89	480	618	139
90	480	618	139
91	480	618	139
92	480	618	139
93	480	619	140
94	480	619	140
95	480	619	140
96	480	619	140
97	480	619	140
98	480	619	140
99	480	619	140
100	480	619	140
101	480	619	140
102	480	620	141
103	480	620	141
104	480	620	141
105	480	620	141
106	480	620	141
107	480	620	141
108	480	620	141
109	480	622	143
110	480	622	143
111	480	622	143
112	480	622	143
113	480	622	143
114	480	622	143
115	480	622	143
116	480	622	143
117	480	622	143
118	480	622	143
119	480	623	144
120	480	623	144
121	480	624	145
122	480	625	146
123	480	625	146
124	480	626	147
125	480	626	147
126	480	626	147
127	480	627	148
128	480	627	148
129	480	627	148
130	480	627	148
131	480	627	148
132	480	627	148
133	480	627	148
134	480	628	149
135	480	628	149
136	480	628	149
137	480	629	150
138	480	629	150
139	480	629	150
140	480	629	150
141	480	629	150
142	480	629	150
143	480	629	150
144	480	629	150
145	480	629	150
146	480	629	150
147	480	629	150
1	481	630	150
2	481	630	150
3	481	630	150
4	481	630	150
5	481	630	150
1	485	631	147
2	485	631	147
3	485	631	147
4	485	631	147
5	485	631	147
6	485	631	147
7	485	631	147
8	485	631	147
9	485	631	147
10	485	631	147
11	485	633	149
12	485	634	150
13	485	634	150
14	485	634	150
15	485	634	150
16	485	634	150
17	485	634	150
18	485	634	150
1	487	634	148
1	488	637	150
2	488	637	150
1	489	638	150
2	489	638	150
3	489	638	150
4	489	638	150
5	489	638	150
1	490	639	150
1	491	640	150
2	491	640	150
1	492	640	149
2	492	641	150
3	492	641	150
4	492	641	150
5	492	641	150
1	493	642	150
2	493	642	150
3	493	642	150
1	496	645	150
1	497	646	150
2	497	646	150
1	498	646	149
2	498	647	150
3	498	647	150
4	498	647	150
5	498	647	150
6	498	647	150
7	498	647	150
8	498	647	150
1	499	646	148
2	499	646	148
3	499	647	149
4	499	648	150
5	499	648	150
6	499	648	150
1	500	648	149
2	500	648	149
3	500	649	150
4	500	649	150
5	500	649	150
6	500	649	150
7	500	649	150
1	503	652	150
2	503	652	150
3	503	652	150
4	503	652	150
5	503	652	150
1	504	653	150
2	504	653	150
3	504	653	150
4	504	653	150
5	504	653	150
6	504	653	150
7	504	653	150
8	504	653	150
9	504	653	150
10	504	653	150
11	504	653	150
12	504	653	150
13	504	653	150
14	504	653	150
15	504	653	150
1	505	654	150
2	505	654	150
1	506	654	149
2	506	654	149
1	507	654	148
2	507	654	148
3	507	654	148
4	507	654	148
5	507	654	148
1	508	654	147
2	508	654	147
3	508	654	147
4	508	654	147
5	508	654	147
6	508	654	147
7	508	654	147
1	509	658	150
2	509	658	150
3	509	658	150
4	509	658	150
5	509	658	150
6	509	658	150
7	509	658	150
1	510	659	150
1	511	659	149
2	511	660	150
3	511	660	150
4	511	660	150
5	511	660	150
6	511	660	150
7	511	660	150
8	511	660	150
1	512	658	147
2	512	661	150
3	512	661	150
4	512	661	150
5	512	661	150
6	512	661	150
7	512	661	150
8	512	661	150
9	512	661	150
10	512	661	150
11	512	661	150
12	512	661	150
13	512	661	150
14	512	661	150
15	512	661	150
16	512	661	150
17	512	661	150
18	512	661	150
19	512	661	150
1	513	662	150
2	513	662	150
3	513	662	150
4	513	662	150
5	513	662	150
6	513	662	150
7	513	662	150
8	513	662	150
9	513	662	150
10	513	662	150
11	513	662	150
12	513	662	150
1	515	663	149
2	515	663	149
3	515	664	150
1	516	661	146
2	516	663	148
1	517	666	150
2	517	666	150
3	517	666	150
4	517	666	150
5	517	666	150
6	517	666	150
7	517	666	150
8	517	666	150
1	518	666	149
2	518	667	150
3	518	667	150
4	518	667	150
5	518	667	150
1	519	668	150
2	519	668	150
1	520	669	150
1	521	670	150
2	521	670	150
3	521	670	150
4	521	670	150
1	522	668	147
2	522	669	148
3	522	671	150
4	522	671	150
1	523	669	147
2	523	671	149
3	523	672	150
4	523	672	150
5	523	672	150
6	523	672	150
7	523	672	150
8	523	672	150
9	523	672	150
10	523	672	150
11	523	672	150
12	523	672	150
13	523	672	150
1	524	667	144
2	524	671	148
3	524	671	148
4	524	672	149
5	524	673	150
6	524	673	150
7	524	673	150
8	524	673	150
9	524	673	150
10	524	673	150
11	524	673	150
12	524	673	150
1	525	673	149
2	525	674	150
1	526	675	150
2	526	675	150
3	526	675	150
4	526	675	150
5	526	675	150
6	526	675	150
7	526	675	150
8	526	675	150
9	526	675	150
10	526	675	150
11	526	675	150
12	526	675	150
13	526	675	150
14	526	675	150
1	527	675	149
2	527	675	149
3	527	676	150
4	527	676	150
5	527	676	150
1	528	675	148
2	528	676	149
3	528	677	150
4	528	677	150
5	528	677	150
6	528	677	150
7	528	677	150
8	528	677	150
1	529	678	150
1	530	679	150
2	530	679	150
3	530	679	150
4	530	679	150
1	531	670	140
2	531	680	150
3	531	680	150
4	531	680	150
5	531	680	150
6	531	680	150
7	531	680	150
8	531	680	150
9	531	680	150
10	531	680	150
11	531	680	150
12	531	680	150
13	531	680	150
1	532	670	139
2	532	681	150
3	532	681	150
1	533	682	150
1	534	683	150
2	534	683	150
3	534	683	150
1	535	682	148
2	535	682	148
3	535	683	149
4	535	684	150
1	536	682	147
2	536	683	148
3	536	685	150
4	536	685	150
5	536	685	150
1	537	686	150
2	537	686	150
3	537	686	150
1	538	687	150
2	538	687	150
3	538	687	150
4	538	687	150
5	538	687	150
1	540	689	150
1	541	690	150
2	541	690	150
3	541	690	150
1	542	691	150
2	542	691	150
1	543	670	128
2	543	692	150
3	543	692	150
4	543	692	150
5	543	692	150
6	543	692	150
7	543	692	150
8	543	692	150
9	543	692	150
10	543	692	150
11	543	692	150
12	543	692	150
1	545	694	150
2	545	694	150
3	545	694	150
4	545	694	150
5	545	694	150
6	545	694	150
7	545	694	150
8	545	694	150
9	545	694	150
10	545	694	150
11	545	694	150
12	545	694	150
13	545	694	150
14	545	694	150
1	546	695	150
2	546	695	150
1	547	696	150
2	547	696	150
3	547	696	150
4	547	696	150
5	547	696	150
6	547	696	150
7	547	696	150
8	547	696	150
9	547	696	150
10	547	696	150
11	547	696	150
1	548	697	150
1	549	698	150
2	549	698	150
1	550	699	150
1	551	700	150
2	551	700	150
3	551	700	150
4	551	700	150
5	551	700	150
6	551	700	150
7	551	700	150
8	551	700	150
9	551	700	150
10	551	700	150
11	551	700	150
12	551	701	151
1	552	670	119
2	552	701	150
3	552	701	150
1	553	702	150
2	553	702	150
3	553	702	150
4	553	702	150
1	554	670	117
2	554	703	150
3	554	703	150
4	554	703	150
5	554	703	150
1	555	702	148
2	555	704	150
3	555	704	150
4	555	704	150
5	555	704	150
6	555	704	150
1	556	705	150
2	556	705	150
3	556	705	150
4	556	705	150
5	556	705	150
6	556	705	150
7	556	705	150
8	556	705	150
1	557	706	150
2	557	706	150
3	557	706	150
1	558	680	123
2	558	707	150
3	558	707	150
4	558	707	150
1	559	708	150
2	559	708	150
3	559	708	150
4	559	708	150
1	560	709	150
2	560	709	150
3	560	709	150
1	561	707	147
2	561	710	150
3	561	710	150
4	561	710	150
5	561	710	150
6	561	710	150
7	561	710	150
8	561	710	150
9	561	710	150
10	561	710	150
11	561	710	150
12	561	710	150
1	562	709	148
2	562	710	149
3	562	710	149
4	562	711	150
5	562	711	150
6	562	711	150
7	562	711	150
8	562	711	150
9	562	711	150
10	562	711	150
11	562	711	150
1	563	707	145
2	563	712	150
3	563	712	150
4	563	712	150
5	563	712	150
6	563	712	150
1	565	714	150
2	565	714	150
3	565	714	150
4	565	714	150
1	566	715	150
2	566	715	150
3	566	715	150
1	567	716	150
2	567	716	150
3	567	716	150
1	568	712	145
2	568	717	150
1	569	718	150
2	569	718	150
3	569	718	150
1	570	719	150
2	570	719	150
3	570	719	150
1	571	695	125
2	571	695	125
3	571	720	150
4	571	720	150
5	571	720	150
6	571	720	150
7	571	720	150
8	571	720	150
9	571	720	150
10	571	720	150
11	571	720	150
12	571	720	150
13	571	720	150
14	571	720	150
15	571	720	150
16	571	720	150
17	571	720	150
18	571	720	150
19	571	720	150
20	571	720	150
21	571	720	150
22	571	720	150
23	571	720	150
24	571	720	150
25	571	720	150
26	571	720	150
27	571	720	150
28	571	720	150
29	571	720	150
30	571	720	150
31	571	720	150
32	571	720	150
33	571	720	150
1	572	720	149
2	572	721	150
3	572	721	150
4	572	721	150
5	573	720	148
1	573	722	150
2	573	722	150
3	573	722	150
1	574	710	137
2	574	723	150
3	574	723	150
4	574	723	150
5	574	723	150
1	576	725	150
2	576	725	150
3	576	725	150
4	576	725	150
5	576	725	150
6	576	725	150
7	576	725	150
8	576	725	150
9	576	725	150
10	576	725	150
1	577	726	150
1	578	727	150
1	579	728	150
2	579	728	150
1	581	730	150
1	584	733	150
2	584	733	150
3	584	733	150
1	585	734	150
2	585	734	150
3	585	734	150
4	585	734	150
5	585	734	150
1	586	736	151
1	587	735	149
1	588	737	150
2	588	737	150
3	588	737	150
4	588	737	150
5	588	737	150
1	589	738	150
2	589	738	150
3	589	738	150
4	589	738	150
1	590	739	150
2	590	739	150
3	590	739	150
4	590	739	150
5	590	739	150
6	590	739	150
7	590	739	150
8	590	739	150
9	590	739	150
10	590	739	150
11	590	739	150
1	591	740	150
2	591	740	150
3	591	740	150
4	591	740	150
5	591	740	150
6	591	740	150
7	591	740	150
8	591	740	150
9	591	740	150
10	591	740	150
11	591	740	150
12	591	740	150
13	591	740	150
14	591	740	150
15	591	740	150
16	591	740	150
17	591	740	150
18	591	740	150
19	591	740	150
20	591	740	150
1	592	738	147
2	592	741	150
3	592	741	150
4	592	741	150
5	592	741	150
6	592	741	150
7	592	741	150
8	592	741	150
9	592	741	150
10	592	741	150
11	592	741	150
12	592	741	150
13	592	741	150
14	592	741	150
15	592	741	150
16	592	741	150
17	592	741	150
18	592	741	150
19	592	741	150
20	592	741	150
21	592	741	150
1	593	740	148
2	593	741	149
3	593	742	150
4	593	742	150
5	593	742	150
6	593	742	150
7	593	742	150
8	593	742	150
1	594	740	147
2	594	740	147
3	594	743	150
4	594	743	150
5	594	743	150
6	594	743	150
7	594	743	150
8	594	743	150
9	594	743	150
10	594	743	150
11	594	743	150
1	595	740	146
2	595	743	149
3	595	743	149
4	595	744	150
5	595	744	150
6	595	744	150
7	595	744	150
1	596	745	150
2	596	745	150
3	596	745	150
4	596	745	150
5	596	745	150
6	596	745	150
7	596	745	150
8	596	745	150
9	596	745	150
10	596	745	150
11	596	745	150
12	596	745	150
13	596	745	150
14	596	745	150
15	596	745	150
16	596	745	150
17	596	745	150
1	597	744	148
1	598	746	149
2	598	747	150
3	598	747	150
4	598	747	150
5	598	747	150
6	598	747	150
7	598	747	150
8	598	747	150
9	598	747	150
10	598	747	150
1	599	748	150
2	599	748	150
3	599	748	150
4	599	748	150
5	599	748	150
6	599	748	150
7	599	748	150
8	599	748	150
9	599	748	150
10	599	748	150
11	599	748	150
12	599	748	150
13	599	748	150
14	599	748	150
15	599	748	150
16	599	748	150
17	599	748	150
18	599	748	150
19	599	748	150
20	599	748	150
21	599	748	150
22	599	748	150
23	599	748	150
24	599	748	150
25	599	748	150
26	599	748	150
27	599	748	150
28	599	748	150
29	599	748	150
30	599	748	150
31	599	748	150
32	599	748	150
1	600	749	150
2	600	749	150
1	601	750	150
2	601	750	150
3	601	750	150
4	601	750	150
5	601	750	150
6	601	750	150
7	601	750	150
1	602	751	150
2	602	751	150
3	602	751	150
4	602	751	150
5	602	751	150
6	602	751	150
7	602	751	150
1	603	750	148
2	603	750	148
3	603	751	149
4	603	752	150
5	603	752	150
6	603	752	150
7	603	752	150
8	603	752	150
9	603	752	150
10	603	752	150
11	603	752	150
12	603	752	150
1	604	752	149
2	604	752	149
3	604	752	149
4	604	752	149
5	604	752	149
6	604	752	149
7	604	753	150
8	604	753	150
9	604	753	150
10	604	753	150
11	604	753	150
12	604	753	150
13	604	753	150
14	604	753	150
15	604	753	150
16	604	753	150
17	604	753	150
18	604	753	150
19	604	753	150
20	604	753	150
21	604	753	150
22	604	753	150
23	604	753	150
24	604	753	150
25	604	753	150
26	604	753	150
1	605	752	148
2	605	752	148
3	605	752	148
4	605	752	148
5	605	753	149
6	605	754	150
7	605	754	150
8	605	754	150
1	606	752	147
2	606	752	147
3	606	752	147
4	606	754	149
5	606	755	150
6	606	755	150
7	606	755	150
8	606	755	150
9	606	755	150
10	606	755	150
11	606	755	150
12	606	755	150
1	607	754	148
2	607	754	148
3	607	756	150
4	607	756	150
5	607	756	150
1	608	642	35
2	608	754	147
3	608	757	150
1	609	758	150
2	609	758	150
3	609	758	150
4	609	758	150
1	611	760	150
2	611	760	150
3	611	760	150
4	611	760	150
5	611	760	150
6	611	760	150
7	611	760	150
8	611	760	150
1	612	760	149
2	612	760	149
3	612	760	149
4	612	760	149
5	612	760	149
6	612	760	149
7	612	760	149
8	612	760	149
9	612	761	150
10	612	761	150
11	612	761	150
12	612	761	150
13	612	761	150
14	612	761	150
15	612	761	150
16	612	761	150
17	612	761	150
18	612	761	150
19	612	761	150
20	612	761	150
21	612	761	150
22	612	761	150
23	612	761	150
24	612	761	150
25	612	761	150
26	612	761	150
27	612	761	150
28	612	761	150
29	612	761	150
30	612	761	150
31	612	761	150
32	612	761	150
33	612	761	150
34	612	761	150
1	613	760	148
2	613	760	148
3	613	761	149
4	613	762	150
5	613	762	150
6	613	762	150
7	613	762	150
8	613	762	150
9	613	762	150
10	613	762	150
11	613	762	150
12	613	762	150
13	613	762	150
14	613	762	150
15	613	762	150
1	614	761	148
2	614	761	148
3	614	762	149
4	614	763	150
5	614	763	150
6	614	763	150
7	614	763	150
8	614	763	150
1	615	764	150
2	615	764	150
3	615	764	150
4	615	764	150
5	615	764	150
1	616	764	149
2	616	764	149
3	616	764	149
4	616	764	149
5	616	764	149
6	616	764	149
7	616	765	150
8	616	765	150
9	616	765	150
10	616	765	150
1	617	764	148
2	617	766	150
3	617	766	150
4	617	766	150
5	617	766	150
6	617	766	150
7	617	766	150
8	617	766	150
9	617	766	150
10	617	766	150
1	618	767	150
2	618	767	150
3	618	767	150
4	618	767	150
5	618	767	150
6	618	767	150
7	618	767	150
8	618	767	150
9	618	767	150
10	618	767	150
11	618	767	150
1	619	768	150
2	619	768	150
1	620	768	149
2	620	768	149
3	620	769	150
4	620	769	150
5	620	769	150
6	620	769	150
7	620	769	150
8	620	769	150
1	621	767	147
2	621	770	150
3	621	770	150
4	621	770	150
5	621	770	150
1	622	769	148
2	622	770	149
3	622	770	149
4	622	771	150
5	622	771	150
6	622	771	150
7	622	771	150
8	622	771	150
9	622	771	150
10	622	771	150
11	622	771	150
12	622	771	150
13	622	771	150
14	622	771	150
15	622	771	150
16	622	771	150
17	622	771	150
18	622	771	150
19	622	771	150
20	622	771	150
21	622	771	150
22	622	771	150
23	622	771	150
1	623	770	148
2	623	770	148
3	623	770	148
4	623	772	150
5	623	772	150
6	623	772	150
7	623	772	150
8	623	772	150
9	623	772	150
10	623	772	150
11	623	772	150
12	623	772	150
13	623	772	150
14	623	772	150
15	623	772	150
16	623	772	150
17	623	772	150
18	623	772	150
19	623	772	150
20	623	774	152
1	624	770	147
2	624	773	150
3	624	773	150
4	624	773	150
5	624	773	150
6	624	773	150
7	624	773	150
8	624	773	150
9	624	773	150
10	624	773	150
1	625	771	147
2	625	773	149
3	625	774	150
4	625	774	150
5	625	774	150
6	625	774	150
7	625	774	150
8	625	774	150
9	625	774	150
10	625	774	150
11	625	774	150
12	625	774	150
13	625	774	150
14	625	774	150
15	625	774	150
16	625	774	150
17	625	774	150
18	625	774	150
19	625	774	150
20	625	774	150
1	626	774	149
2	626	775	150
3	626	775	150
4	626	775	150
5	626	775	150
6	626	775	150
7	626	775	150
1	627	747	121
2	627	747	121
3	627	775	149
4	627	776	150
5	627	776	150
6	627	776	150
7	627	776	150
1	628	753	126
2	628	775	148
3	628	776	149
4	628	776	149
5	628	776	149
6	628	776	149
7	628	776	149
8	628	777	150
1	629	778	150
1	630	779	150
2	630	779	150
3	630	779	150
1	631	779	149
2	631	780	150
3	631	780	150
4	631	780	150
5	631	780	150
1	632	779	148
2	632	779	148
3	632	780	149
4	632	781	150
5	632	781	150
6	632	781	150
7	632	781	150
8	632	781	150
9	632	781	150
10	632	781	150
11	632	781	150
12	632	781	150
13	632	781	150
14	632	781	150
15	632	781	150
16	632	781	150
1	633	782	150
2	633	782	150
1	634	783	150
2	634	783	150
3	634	783	150
4	634	783	150
5	634	783	150
1	635	782	148
2	635	784	150
3	635	784	150
4	635	784	150
1	636	785	150
2	636	785	150
3	636	785	150
4	636	785	150
5	636	785	150
1	637	784	148
2	637	786	150
3	637	786	150
4	637	786	150
5	637	786	150
6	637	786	150
7	637	786	150
8	637	786	150
9	637	786	150
10	637	786	150
11	637	786	150
12	637	786	150
13	637	786	150
14	637	786	150
15	637	786	150
16	637	786	150
17	637	786	150
18	637	786	150
19	637	786	150
20	637	786	150
21	637	786	150
22	637	786	150
23	637	786	150
24	637	786	150
25	637	786	150
26	637	786	150
27	637	786	150
28	637	786	150
29	637	786	150
30	637	786	150
31	637	786	150
32	637	786	150
33	637	786	150
34	637	786	150
35	637	786	150
36	637	786	150
37	637	786	150
1	638	776	139
2	638	787	150
3	638	787	150
4	638	787	150
5	638	787	150
6	638	787	150
7	638	787	150
8	638	787	150
1	639	788	150
2	639	788	150
3	639	788	150
4	639	788	150
5	639	788	150
6	639	788	150
7	639	788	150
8	639	788	150
9	639	788	150
10	639	788	150
1	640	789	150
2	640	789	150
1	641	790	150
2	641	790	150
3	641	790	150
4	641	790	150
1	642	791	150
2	642	791	150
3	642	791	150
4	642	791	150
5	642	791	150
6	642	791	150
7	642	791	150
8	642	791	150
9	642	791	150
10	642	791	150
11	642	791	150
12	642	791	150
13	642	791	150
1	643	789	147
1	644	791	148
2	644	792	149
3	644	792	149
4	644	792	149
5	644	792	149
6	644	793	150
7	644	793	150
8	644	793	150
9	644	793	150
10	644	793	150
11	644	793	150
12	644	793	150
13	644	793	150
14	644	793	150
15	644	793	150
16	644	793	150
17	644	793	150
18	644	793	150
19	644	793	150
20	644	793	150
21	644	793	150
22	644	793	150
23	644	793	150
24	644	793	150
25	644	793	150
26	644	793	150
27	644	793	150
28	644	793	150
29	644	793	150
30	644	793	150
31	644	793	150
1	645	793	149
2	645	793	149
3	645	793	149
4	645	793	149
5	645	794	150
6	645	794	150
7	645	794	150
8	645	794	150
9	645	794	150
10	645	794	150
1	646	794	149
2	646	795	150
3	646	795	150
4	646	795	150
1	647	793	147
2	647	796	150
3	647	796	150
1	648	776	129
2	648	797	150
3	648	797	150
1	649	798	150
2	649	798	150
3	649	798	150
4	649	798	150
5	649	798	150
6	649	798	150
7	649	798	150
8	649	798	150
9	649	798	150
10	649	798	150
1	650	799	150
2	650	799	150
3	650	799	150
4	650	799	150
5	650	799	150
6	650	799	150
7	650	799	150
8	650	799	150
1	651	797	147
2	651	798	148
3	651	799	149
4	651	800	150
5	651	800	150
6	651	800	150
7	651	800	150
8	651	800	150
9	651	800	150
10	651	800	150
11	651	800	150
12	651	800	150
13	651	800	150
14	651	800	150
15	651	800	150
16	651	800	150
17	651	800	150
18	651	800	150
19	651	800	150
20	651	800	150
21	651	800	150
22	651	800	150
23	651	800	150
24	651	800	150
25	651	800	150
26	651	800	150
27	651	800	150
28	651	800	150
29	651	800	150
30	651	800	150
31	651	800	150
32	651	800	150
33	651	800	150
34	651	800	150
35	651	800	150
36	651	800	150
37	651	800	150
38	651	800	150
39	651	800	150
40	651	800	150
41	651	800	150
42	651	800	150
43	651	800	150
44	651	800	150
45	651	800	150
46	651	800	150
47	651	800	150
48	651	800	150
49	651	800	150
1	652	801	150
2	652	801	150
3	652	801	150
4	652	801	150
5	652	801	150
6	652	801	150
1	656	793	138
2	656	799	144
3	656	802	147
4	656	802	147
5	656	802	147
6	656	803	148
7	656	803	148
8	656	803	148
9	656	803	148
10	656	803	148
11	656	804	149
12	656	804	149
13	656	804	149
14	656	804	149
15	656	804	149
16	656	804	149
17	656	804	149
18	656	804	149
19	656	804	149
20	656	804	149
21	656	804	149
22	656	804	149
23	656	804	149
24	656	804	149
25	656	804	149
26	656	804	149
27	656	804	149
28	656	805	150
29	656	805	150
1	657	806	150
1	658	806	149
2	658	806	149
3	658	806	149
4	658	806	149
5	658	807	150
6	658	807	150
7	658	807	150
8	658	807	150
1	659	807	149
2	659	808	150
1	660	809	150
2	660	809	150
1	662	811	150
2	662	811	150
3	662	811	150
1	663	812	150
1	664	813	150
2	664	813	150
3	664	813	150
4	664	813	150
5	664	813	150
6	664	813	150
1	665	814	150
2	665	814	150
3	665	814	150
4	665	814	150
5	665	814	150
6	665	814	150
1	666	814	149
2	666	814	149
3	666	814	149
4	666	814	149
5	666	815	150
6	666	815	150
7	666	815	150
8	666	815	150
9	666	815	150
10	666	815	150
11	666	815	150
12	666	815	150
13	666	815	150
14	666	815	150
15	666	815	150
16	666	815	150
17	666	815	150
18	666	815	150
19	666	815	150
1	667	815	149
2	667	815	149
3	667	815	149
4	667	816	150
5	667	816	150
6	667	816	150
7	667	816	150
8	667	816	150
9	667	816	150
10	667	816	150
11	667	816	150
12	667	816	150
13	667	816	150
14	667	816	150
15	667	816	150
16	667	816	150
17	667	816	150
18	667	816	150
19	667	816	150
20	667	816	150
21	667	816	150
22	667	816	150
1	668	816	149
2	668	816	149
3	668	817	150
4	668	817	150
5	668	817	150
6	668	817	150
1	669	793	125
2	669	812	144
3	669	818	150
4	669	818	150
5	669	818	150
1	670	819	150
2	670	819	150
3	670	819	150
4	670	819	150
5	670	819	150
6	670	819	150
1	671	793	123
2	671	820	150
3	671	820	150
4	671	820	150
5	671	820	150
1	672	800	129
2	672	821	150
3	672	821	150
4	672	821	150
5	672	821	150
6	672	821	150
1	673	821	149
2	673	822	150
1	674	822	149
2	674	822	149
3	674	822	149
4	674	823	150
5	674	823	150
6	674	823	150
7	674	823	150
8	674	823	150
9	674	823	150
10	674	823	150
11	674	823	150
12	674	823	150
13	674	823	150
14	674	823	150
15	674	823	150
16	674	823	150
17	674	823	150
18	674	823	150
19	674	823	150
20	674	823	150
21	674	823	150
22	674	823	150
23	674	823	150
24	674	823	150
25	674	823	150
26	674	823	150
27	674	823	150
28	674	823	150
1	675	822	148
2	675	823	149
3	675	824	150
4	675	824	150
5	675	824	150
6	675	824	150
7	675	824	150
8	675	824	150
9	675	824	150
10	675	824	150
11	675	824	150
12	675	824	150
13	675	824	150
14	675	824	150
15	675	824	150
16	675	824	150
17	675	824	150
18	675	824	150
19	675	824	150
20	675	824	150
1	676	824	149
2	676	825	150
3	676	825	150
4	676	825	150
5	676	825	150
6	676	825	150
1	677	825	149
2	677	825	149
3	677	826	150
4	677	826	150
5	677	826	150
6	677	826	150
7	677	826	150
8	677	826	150
9	677	826	150
10	677	826	150
11	677	826	150
12	677	826	150
13	677	826	150
14	677	826	150
15	677	826	150
16	677	826	150
17	677	826	150
18	677	826	150
19	677	826	150
20	677	826	150
21	677	826	150
22	677	826	150
23	677	826	150
24	677	826	150
25	677	826	150
26	677	826	150
27	677	826	150
28	677	826	150
29	677	826	150
30	677	826	150
31	677	826	150
32	677	826	150
33	677	826	150
34	677	826	150
35	677	826	150
36	677	826	150
37	677	826	150
38	677	826	150
39	677	826	150
40	677	826	150
41	677	826	150
1	678	827	150
2	678	827	150
3	678	827	150
4	678	827	150
5	678	827	150
6	678	827	150
7	678	827	150
8	678	827	150
1	679	827	149
2	679	827	149
3	679	828	150
4	679	828	150
5	679	828	150
6	679	828	150
7	679	828	150
8	679	828	150
9	679	828	150
10	679	828	150
11	679	828	150
12	679	828	150
13	679	828	150
14	679	828	150
15	679	828	150
16	679	828	150
17	679	828	150
18	679	828	150
19	679	828	150
20	679	828	150
21	679	828	150
22	679	828	150
23	679	828	150
24	679	828	150
25	679	828	150
26	679	828	150
27	679	828	150
28	679	828	150
1	680	827	148
2	680	827	148
3	680	828	149
4	680	829	150
5	680	829	150
6	680	829	150
7	680	829	150
8	680	829	150
9	680	829	150
10	680	829	150
11	680	829	150
12	680	829	150
13	680	829	150
14	680	829	150
15	680	829	150
16	680	829	150
17	680	829	150
18	680	829	150
19	680	829	150
20	680	829	150
21	680	829	150
22	680	829	150
23	680	829	150
24	680	829	150
25	680	829	150
26	680	829	150
27	680	829	150
28	680	829	150
29	680	829	150
30	680	829	150
31	680	829	150
32	680	829	150
1	681	829	149
2	681	829	149
3	681	829	149
4	681	829	149
5	681	829	149
6	681	829	149
7	681	829	149
8	681	830	150
9	681	830	150
10	681	830	150
11	681	830	150
12	681	830	150
13	681	830	150
14	681	830	150
15	681	830	150
16	681	830	150
17	681	830	150
18	681	830	150
19	681	830	150
20	681	830	150
21	681	830	150
22	681	830	150
23	681	830	150
24	681	830	150
25	681	830	150
1	682	829	148
2	682	829	148
3	682	829	148
4	682	831	150
5	682	831	150
6	682	831	150
1	683	832	150
2	683	832	150
3	683	832	150
4	683	832	150
5	683	832	150
6	683	832	150
7	683	832	150
8	683	832	150
9	683	832	150
1	684	828	145
2	684	829	146
3	684	832	149
4	684	832	149
5	684	833	150
6	684	833	150
7	684	833	150
1	685	834	150
1	686	835	150
2	686	835	150
3	686	835	150
4	686	835	150
5	686	835	150
6	686	835	150
7	686	835	150
8	686	835	150
9	686	835	150
10	686	835	150
11	686	835	150
12	686	835	150
1	687	836	150
2	687	836	150
3	687	836	150
1	689	838	150
2	689	838	150
3	689	838	150
4	689	838	150
5	689	838	150
6	689	838	150
7	689	838	150
8	689	838	150
9	689	838	150
10	689	838	150
11	689	838	150
12	689	838	150
13	689	838	150
14	689	838	150
15	689	838	150
16	689	838	150
17	689	838	150
18	689	838	150
19	689	838	150
20	689	838	150
21	689	838	150
22	689	838	150
1	690	839	150
2	690	839	150
3	690	839	150
4	690	839	150
1	691	839	149
2	691	840	150
3	691	840	150
4	691	840	150
5	691	840	150
1	693	839	147
2	693	839	147
3	693	839	147
4	693	839	147
5	693	839	147
6	693	841	149
7	693	841	149
8	693	842	150
9	693	842	150
10	693	842	150
11	693	842	150
12	693	842	150
13	693	842	150
14	693	842	150
15	693	842	150
16	693	842	150
17	693	842	150
1	694	839	146
2	694	841	148
3	694	841	148
4	694	841	148
5	694	842	149
6	694	842	149
7	694	842	149
8	694	842	149
9	694	842	149
10	694	842	149
11	694	842	149
12	694	843	150
13	694	843	150
14	694	843	150
15	694	843	150
16	694	843	150
17	694	843	150
18	694	843	150
19	694	844	151
1	695	841	147
2	695	841	147
3	695	842	148
4	695	843	149
5	695	844	150
6	695	844	150
7	695	844	150
8	695	844	150
9	695	844	150
10	695	844	150
11	695	844	150
12	695	844	150
13	695	844	150
14	695	844	150
15	695	844	150
16	695	844	150
17	695	844	150
18	695	844	150
19	695	844	150
20	695	844	150
21	695	844	150
22	695	844	150
23	695	844	150
24	695	844	150
25	695	844	150
26	695	844	150
27	695	844	150
28	695	844	150
29	695	844	150
30	695	844	150
31	695	844	150
32	695	844	150
33	695	844	150
34	695	844	150
35	695	844	150
36	695	844	150
37	695	844	150
38	695	844	150
39	695	844	150
40	695	844	150
41	695	844	150
42	695	844	150
43	695	844	150
44	695	844	150
45	695	844	150
46	695	844	150
47	695	844	150
48	695	844	150
49	695	844	150
50	695	844	150
51	695	844	150
52	695	844	150
53	695	844	150
54	695	844	150
55	695	844	150
56	695	844	150
57	695	844	150
58	695	844	150
59	695	844	150
60	695	844	150
61	695	844	150
62	695	844	150
63	695	844	150
64	695	844	150
65	695	844	150
66	695	844	150
67	695	844	150
1	696	843	148
2	696	844	149
3	696	844	149
4	696	844	149
5	696	844	149
6	696	844	149
7	696	845	150
8	696	845	150
9	696	845	150
10	696	845	150
11	696	845	150
12	696	845	150
13	696	845	150
14	696	845	150
15	696	845	150
16	696	845	150
17	696	845	150
1	697	845	149
2	697	845	149
3	697	845	149
4	697	845	149
5	697	846	150
6	697	846	150
7	697	846	150
8	697	846	150
1	698	844	147
2	698	846	149
3	698	847	150
4	698	847	150
5	698	847	150
6	698	847	150
7	698	847	150
8	698	848	151
1	699	847	149
2	699	847	149
3	699	848	150
4	699	848	150
5	699	848	150
1	700	844	145
2	700	849	150
3	700	849	150
4	700	849	150
5	700	849	150
6	700	849	150
7	700	849	150
8	700	849	150
9	700	849	150
10	700	849	150
11	700	849	150
1	701	846	146
2	701	850	150
3	701	850	150
1	703	851	149
2	703	851	149
3	703	852	150
4	703	852	150
5	703	852	150
6	703	852	150
1	704	852	149
2	704	853	150
3	704	853	150
1	705	854	150
2	705	854	150
3	705	854	150
4	705	854	150
1	706	855	150
2	706	855	150
3	706	855	150
1	707	856	150
2	707	856	150
1	708	854	147
2	708	855	148
3	708	857	150
1	709	856	148
2	709	858	150
3	709	858	150
4	709	858	150
5	709	858	150
6	709	858	150
7	709	858	150
8	709	858	150
9	709	858	150
1	710	857	148
2	710	859	150
1	711	854	144
2	711	856	146
3	711	857	147
4	711	857	147
5	711	857	147
6	711	860	150
7	711	860	150
8	711	860	150
9	711	860	150
1	712	860	149
2	712	860	149
3	712	861	150
4	712	861	150
5	712	861	150
6	712	861	150
7	712	861	150
8	712	861	150
9	712	861	150
10	712	861	150
11	712	861	150
12	712	861	150
13	712	861	150
14	712	861	150
15	712	861	150
16	712	861	150
17	712	861	150
18	712	861	150
19	712	861	150
20	712	861	150
21	712	861	150
1	713	860	148
2	713	861	149
3	713	861	149
4	713	862	150
5	713	862	150
6	713	862	150
7	713	862	150
8	713	862	150
9	713	862	150
1	714	863	150
[truncated: 4,424 more rows]
