# Supplementary material for: Uricase-deficient rat is generated with CRISPR/Cas9 technique
Source: PeerJ. 2020 Apr 27;8:e8971. doi: 10.7717/peerj.8971 (PMC7192158; doi:10.7717/peerj.8971)
Supplement: Supplemental Information 12 — Rat body weight of Uox-/- rats of F2 - F6 animals. [file peerj-08-8971-s012.xls]

## Sheet: male
name	sex	birth	body weight	SUA	generation
BF2-1	male	2018.10.9	119.7	96.1032	2
BF2-1	male	2018.10.9	121.2	85.0079	2
AF2-1	male	2018.12.16	173	74	2
AF2-1	male	2018.12.16	203	63.8	2
BF2-1	male	2018.12.16	194	63.1	2
BF2-1	male	2018.12.16	195	62.1	2
BF2-1	male	2018.12.16	206	57.6	2
AF2-1	male	2018.10.11	109.5	57.5032	2
BF2-1	male	2018.12.16	192	57.1	2
AF2-1	male	2018.12.16	198	56.3	2
BF2-1	male	2018.12.16	201	55.7	2
BF2-2	male	2018.11.18	178	54.31	2
BF2-2	male	2018.11.18	186	47.6654	2
AF2-1	male	2018.12.16	202	39.7	2
BF2-1	male	2018.10.9	111.3	36.8738	2
BF2-1	male	2018.12.16	209	32.4	2
BF2-1	male	2018.10.9	113.2	24.5365	2
BF2-1	male	2018.12.16	197	24.2	2
BF2-1	male	2018.12.16	206	22.2	2
BF2-1	male	2018.10.9	120.3	21.9429	2
BF2-1	male	2018.10.9	127.3	21.5675	2
AF2-1	male	2018.12.16	205	21.2	2
BF3-8	male	2019.3.10	198	121.11	3
BF3-8	male	2019.3.10	177	120.262	3
BF3-3	male	2019.1.3	206	97.3	3
BF3-8	male	2019.3.10	175	88.6429	3
AF3-4	male	2019.1.15	222.5	87.75	3
BF3-1	male	2019.1.13	228	81.7875	3
AF3-3	male	2019.1.2	214	70.5	3
BF3-6	male	2019.1.4	215	67.6	3
BF3-8	male	2019.3.10	183	62.831	3
BF3-6	male	2019.1.4	210	61.2	3
AF3-3	male	2019.1.2	205	61.1	3
BF3-8	male	2019.3.10	186	60.0357	3
BF3-6	male	2019.1.4	208	59.1	3
BF3-5	male	2019.1.1	238	53.6	3
BF3-5	male	2019.1.1	243	53.2	3
BF3-2	male	2019.1.5	179	52.5	3
BF3-4	male	2018.12.31	161	51.9	3
AF3-1	male	2019.1.4	219	51.6	3
BF3-3	male	2019.1.3	208	51.3	3
BF3-1	male	2019.1.13	235	50.2031	3
AF3-2	male	2018.12.31	225	48.3	3
BF3-3	male	2019.1.3	175	48.2	3
AF3-3	male	2019.1.2	220	47.2	3
BF3-4	male	2018.12.31	195	44.9	3
BF3-4	male	2018.12.31	216	44.2	3
AF3-3	male	2019.1.2	155	43.8	3
BF3-7	male	2019.3.6	194	42.9583	3
BF3-3	male	2019.1.3	212	42.6	3
BF3-7	male	2019.3.6	176	41.6667	3
BF3-5	male	2019.1.1	243	40.8	3
BF3-4	male	2018.12.31	202	40.5	3
BF3-6	male	2019.1.4	227	40.1	3
BF3-7	male	2019.3.6	202	40.0347	3
BF3-3	male	2019.1.3	225	39.6	3
AF3-4	male	2019.1.15	252	39.5	3
BF3-4	male	2018.12.31	224	39.5	3
BF3-3	male	2019.1.3	192	38.5	3
BF3-4	male	2018.12.31	193	37.3	3
AF3-4	male	2019.1.15	248	36.6389	3
BF3-4	male	2018.12.31	182	36.1	3
BF3-6	male	2019.1.4	216	36.1	3
AF3-2	male	2018.12.31	232	35	3
BF3-4	male	2018.12.31	242	33.4	3
BF3-1	male	2019.1.13	251	31.9375	3
BF3-6	male	2019.1.4	219	25.6	3
AF3-4	male	2019.1.15	226	15.7764	3
BF3-2	male	2019.1.5	198	15.2	3
AF4-2	male	2019.3.26	N/A	N/A	4
AF4-1	male	2019.3.28	154	54.8283	4
AF4-3	male	2019.3.21	192	42.5304	4
BF4-2	male	2019.3.29	207	41.9217	4
BF4-3	male	2019.3.21	186	21.5512	4
BF4-5	male	2019.3.21	162	21.295	4
BF4-5	male	2019.3.21	162	20.7263	4
BF4-3	male	2019.3.21	190	17.39	4
BF4-5	male	2019.3.21	162	16.6575	4
BF4-3	male	2019.3.21	187	15.6187	4
BF4-5	male	2019.3.21	171	15.3387	4
AF4-1	male	2019.3.28	151	14.8598	4
AF4-1	male	2019.3.28	155	14.3489	4
BF4-3	male	2019.3.21	185	14.3375	4
BF5-4	male	2019.08.01	178	88.4318	5
BF5-4	male	2019.08.01	356	79.1763	5
BF5-5	male	2019.09.22	158	77.631	5
BF5-5	male	2019.09.22	168	75.2214	5
BF5-4	male	2019.08.01	175	75.0227	5
BF5-4	male	2019.08.01	205	71.8636	5
BF5-4	male	2019.08.01	205	65.6316	5
BF5-4	male	2019.08.01	208	58.8421	5
BF5-6	male	2019.09.27	215	57.9886	5
BF5-2	male	2019.07.14	137	57.1943	5
BF5-5	male	2019.09.22	161	56.8333	5
BF5-2	male	2019.07.14	170	53.5057	5
BF5-6	male	2019.09.27	212	53.0659	5
BF5-2	male	2019.07.14	179	50.642	5
BF5-2	male	2019.07.14	153	48.2114	5
BF5-5	male	2019.09.22	161	47.869	5
BF5-2	male	2019.07.14	167	47.7898	5
BF5-2	male	2019.07.14	179	46.45	5
BF5-1	male	2019.06.23	182	45.7131	5
BF5-1	male	2019.06.23	184	44.5095	5
BF5-2	male	2019.07.14	155	44.1648	5
BF5-2	male	2019.07.14	165	43.6534	5
BF5-1	male	2019.06.23	184	42.8262	5
BF5-5	male	2019.09.22	168	42.769	5
BF5-1	male	2019.06.23	196	42.4833	5
BF5-3	male	2019.07.15	224	42.2602	5
BF5-6	male	2019.09.27	218	40.6932	5
BF5-3	male	2019.07.15	201	38.4023	5
BF5-3	male	2019.07.15	211	37.7398	5
BF5-6	male	2019.09.27	217	36.7136	5
BF5-6	male	2019.09.27	219	36.4432	5
BF5-3	male	2019.07.15	205	34.8682	5
BF5-3	male	2019.07.15	204	30.4102	5
BF5-3	male	2019.07.15	218	28.1193	5
BF5-6	male	2019.09.27	218	26.5659	5
BF5-1	male	2019.06.23	174	24.5286	5
BF6-4	male	2019.09.27	224	76.8977	6
BF6-7	male	2019.11.8	296	75.2776	6
BF6-7	male	2019.11.8	285	68.8934	6
BF6-6	male	2019.11.20	305	68.3947	6
BF6-1	male	2019.09.12	186	66.725	6
BF6-5	male	2019.10.17	262	66.4868	6
BF6-1	male	2019.09.12	185	64.7321	6
BF6-5	male	2019.10.17	256	63.8015	6
BF6-1	male	2019.09.12	185	60.4774	6
BF6-3	male	2019.09.27	183	59.6795	6
BF6-2	male	2019.09.14	172	56.3393	6
BF6-3	male	2019.09.27	175	56.2273	6
BF6-4	male	2019.09.27	212	56.0364	6
BF6-6	male	2019.11.20	276	54.8947	6
BF6-1	male	2019.09.12	160	53.8571	6
BF6-3	male	2019.09.27	209	53.6909	6
BF6-7	male	2019.11.8	272	53.2158	6
BF6-6	male	2019.11.20	287	51.2224	6
BF6-2	male	2019.09.14	172	51.2214	6
BF6-5	male	2019.10.17	243	49.4912	6
BF6-3	male	2019.09.27	193	49.3636	6
BF6-1	male	2019.09.12	192	47.6619	6
BF6-7	male	2019.11.8	298	47.2184	6
BF6-7	male	2019.11.8	315	47.0329	6
BF6-6	male	2019.11.20	289	46.8961	6
BF6-3	male	2019.09.27	206	46.2227	6
BF6-6	male	2019.11.20	296	44.5276	6
BF6-6	male	2019.11.20	302	44.2987	6
BF6-3	male	2019.09.27	185	42.7182	6
BF6-2	male	2019.09.14	195	42.6214	6
BF6-7	male	2019.11.8	288	41.35	6
BF6-7	male	2019.11.8	299	40.7908	6
BF6-1	male	2019.09.12	171	40.5071	6
BF6-7	male	2019.11.8	281	40.4474	6
BF6-2	male	2019.09.14	174	39.6083	6
BF6-3	male	2019.09.27	205	39.4432	6
BF6-7	male	2019.11.8	301	38.3224	6
BF6-3	male	2019.09.27	192	37.2955	6
BF6-6	male	2019.11.20	282	36.5408	6
BF6-3	male	2019.09.27	196	35.1591	6
BF6-3	male	2019.09.27	196	33.0341	6
			204.401	48.1139
			42.719	18.7417

## Sheet: Female
name	sex	birth	body weight	SUA	generation
AF2-1	female	2018.12.16	158	93	2
BF2-1	female	2018.12.16	161	76	2
BF2-1	female	2018.12.16	154	66.3	2
AF2-1	female	2018.10.11	104.7	59.5032	2
AF2-1	female	2018.10.11	110.8	51.1051	2
BF2-2	female	2018.11.18	160	41.75	2
BF2-1	female	2018.10.9	102.3	35.4421	2
AF2-1	female	2018.12.16	140	30.4	2
BF2-1	female	2018.10.9	109.7	27.9135	2
AF2-1	female	2018.12.16	162	26.6	2
AF2-1	female	2018.10.11	90.8	24.2596	2
BF2-1	female	2018.10.9	112.4	22.3595	2
BF2-1	female	2018.12.16	149	22.1	2
AF2-1	female	2018.12.16	153	21.7	2
AF2-1	female	2018.12.16	176	20.7	2
AF2-1	female	2018.12.16	160	20.3	2
AF2-1	female	2018.12.16	161	20.2	2
BF2-1	female	2018.10.9	110.3	19.1397	2
BF2-1	female	2018.12.16	167	18.7	2
BF2-1	female	2018.12.16	154	17.8	2
BF2-1	female	2018.12.16	156	16.8	2
BF2-1	female	2018.12.16	166	16.3	2
BF2-1	female	2018.10.9	104.5	15.3452	2
BF2-1	female	2018.10.9	113.2	14.2937	2
AF2-1	female	2018.10.11	101.5	12.125	2
AF2-1	female	2018.10.11	107.3	11.0109	2
BF3-1	female	2019.1.13	195	died	3
AF3-2	female	2018.12.31	175	125	3
AF3-2	female	2018.12.31	161	115	3
BF3-3	female	2019.1.3	165	84.1	3
AF3-3	female	2019.1.2	158	81.7	3
BF3-3	female	2019.1.3	181	81.7	3
BF3-3	female	2019.1.3	179	79.5	3
AF3-3	female	2019.1.2	165	74.2	3
AF3-3	female	2019.1.2	163	73.9	3
BF3-3	female	2019.1.3	165	72.2	3
BF3-6	female	2019.1.4	170	72	3
BF3-2	female	2019.1.5	152	69.3	3
BF3-2	female	2019.1.5	148	66.4	3
AF3-1	female	2019.1.4	162	65.9	3
BF3-2	female	2019.1.5	149	57.8	3
BF3-2	female	2019.1.5	140	54.7	3
BF3-8	female	2019.3.10	154	53.8215	3
BF3-2	female	2019.1.5	152	52.2	3
AF3-1	female	2019.1.4	148	51.6	3
BF3-6	female	2019.1.4	165	51.5	3
BF3-8	female	2019.3.10	169	50.766	3
BF3-7	female	2019.3.6	163	50.6264	3
BF3-2	female	2019.1.5	146	50.2	3
BF3-7	female	2019.3.6	195	49.5889	3
BF3-7	female	2019.3.6	147	49.3722	3
BF3-2	female	2019.1.5	152	46.8	3
BF3-2	female	2019.1.5	158	46	3
BF3-5	female	2019.1.1	176	44.3	3
BF3-3	female	2019.1.3	170	43.6	3
AF3-4	female	2019.1.15	165	43.25	3
AF3-2	female	2018.12.31	182	41.4	3
BF3-6	female	2019.1.4	176	41.3	3
AF3-2	female	2018.12.31	178	40.4	3
AF3-4	female	2019.1.15	179	39.8819	3
BF3-3	female	2019.1.3	176	38.2	3
BF3-4	female	2018.12.31	172	34.8	3
BF3-7	female	2019.3.6	213	34.2639	3
BF3-6	female	2019.1.4	165	32.8	3
AF3-2	female	2018.12.31	194	31.9	3
BF3-3	female	2019.1.3	163	31.8	3
AF3-3	female	2019.1.2	156	29.7	3
BF3-4	female	2018.12.31	178	28.4	3
BF3-5	female	2019.1.1	184	28.2	3
BF3-4	female	2018.12.31	216	27.9	3
BF3-5	female	2019.1.1	183	27.9	3
BF3-2	female	2019.1.5	159	25.5	3
BF3-4	female	2018.12.31	194	25.5	3
BF3-4	female	2018.12.31	173	25.3	3
AF3-1	female	2019.1.4	184	22.6	3
BF3-6	female	2019.1.4	181	22.2	3
AF3-1	female	2019.1.4	170	20.2	3
AF3-4	female	2019.1.15	161	15.5278	3
AF3-4	female	2019.1.15	179	14.4986	3
BF3-6	female	2019.1.4	179	13.6	3
BF3-2	female	2019.1.5	156	11.5	3
BF3-2	female	2019.1.5	162	10.9	3
AF3-4	female	2019.1.15	180	10.6722	3
AF3-4	female	2019.1.15	160	9.10278	3
AF4-1	female	2019.3.28	174	48.6424	4
BF4-5	female	2019.3.21	139	48.4637	4
BF4-2	female	2019.3.29	153	47.4239	4
BF4-3	female	2019.3.21	145	44.68	4
AF4-1	female	2019.3.28	170	44.0261	4
BF4-3	female	2019.3.21	135	43.1812	4
BF4-3	female	2019.3.21	154	39.39	4
BF4-4	female	2019.3.21	150	38.6	4
BF4-3	female	2019.3.21	142	37.3137	4
BF4-2	female	2019.3.29	154	36.3587	4
BF4-2	female	2019.3.29	145	34.6304	4
BF4-3	female	2019.3.21	141	22.8675	4
BF4-5	female	2019.3.21	133	21.2862	4
BF4-5	female	2019.3.21	129	20.7662	4
BF4-3	female	2019.3.21	158	18.79	4
BF4-2	female	2019.3.29	161	18.6543	4
BF4-2	female	2019.3.29	165	18.087	4
BF4-2	female	2019.3.29	153	17.4	4
BF4-2	female	2019.3.29	183	17.3913	4
BF4-3	female	2019.3.21	153	16.2937	4
BF4-5	female	2019.3.21	133	15.1313	4
AF4-1	female	2019.3.28	189	14.7337	4
BF4-2	female	2019.3.29	165	14.3804	4
BF4-2	female	2019.3.29	160	14.1413	4
BF4-5	female	2019.3.21	138	13.4913	4
BF4-2	female	2019.3.29	169	13.1109	4
BF4-5	female	2019.3.21	138	12.9187	4
BF4-5	female	2019.3.21	144	12.425	4
BF4-2	female	2019.3.29	157	12.3913	4
AF4-1	female	2019.3.28	195	11.6478	4
AF4-2	female	2019.3.26	132	11.5775	4
BF4-5	female	2019.3.21	145	10.175	4
BF4-2	female	2019.3.29	170	9.25	4
BF5-4	female	2019.08.01	238	61.7632	5
BF5-4	female	2019.08.01	167	56.5789	5
BF5-2	female	2019.07.14	152	53.2614	5
BF5-4	female	2019.08.01	169	52.2368	5
BF5-1	female	2019.06.23	154	51.7738	5
BF5-2	female	2019.07.14	137	51.4227	5
BF5-2	female	2019.07.14	126	51.0614	5
BF5-2	female	2019.07.14	145	49.9682	5
BF5-5	female	2019.09.22	146	49.4405	5
BF5-6	female	2019.09.27	173	49.1023	5
BF5-1	female	2019.06.23	164	45.9595	5
BF5-1	female	2019.06.23	193	44.2024	5
BF5-5	female	2019.09.22	142	42.875	5
BF5-6	female	2019.09.27	167	41.5659	5
BF5-6	female	2019.09.27	163	39.9977	5
BF5-2	female	2019.07.14	144	39.7955	5
BF5-2	female	2019.07.14	148	38.8477	5
BF5-1	female	2019.06.23	156	38.7619	5
BF5-3	female	2019.07.15	166	37.4784	5
BF5-3	female	2019.07.15	177	34.267	5
BF5-6	female	2019.09.27	177	32.9795	5
BF5-6	female	2019.09.27	176	32.9091	5
BF5-6	female	2019.09.27	179	32.4205	5
BF5-6	female	2019.09.27	172	31.8523	5
BF5-6	female	2019.09.27	150	31.2182	5
BF5-6	female	2019.09.27	161	31.0659	5
BF5-3	female	2019.07.15	156	30.0443	5
BF5-2	female	2019.07.14	147	29.0841	5
BF5-3	female	2019.07.15	159	28.9045	5
BF5-3	female	2019.07.15	179	28.2739	5
BF5-3	female	2019.07.15	170	27.342	5
BF5-3	female	2019.07.15	178	26.3443	5
BF5-5	female	2019.09.22	144	25.5881	5
BF5-3	female	2019.07.15	158	24.8091	5
BF6-4	female	2019.09.27	179	79.2977	6
BF6-5	female	2019.10.17	157	79.0441	6
BF6-5	female	2019.10.17	147	79.0294	6
BF6-4	female	2019.09.27	167	76.9864	6
BF6-1	female	2019.09.12	148	72.1774	6
BF6-1	female	2019.09.12	149	68.9179	6
BF6-1	female	2019.09.12	149	67.775	6
BF6-2	female	2019.09.14	152	63.0119	6
BF6-5	female	2019.10.17	178	62.9485	6
BF6-2	female	2019.09.14	147	60.3452	6
BF6-2	female	2019.09.14	148	56.3381	6
BF6-7	female	2019.11.8	196	55.5408	6
BF6-1	female	2019.09.12	131	54.1369	6
BF6-5	female	2019.10.17	166	52.5971	6
BF6-2	female	2019.09.14	149	52.381	6
BF6-1	female	2019.09.12	142	50.9119	6
BF6-2	female	2019.09.14	140	50.781	6
BF6-2	female	2019.09.14	151	50.5714	6
BF6-3	female	2019.09.27	130	47.1568	6
BF6-1	female	2019.09.12	148	46.7024	6
BF6-3	female	2019.09.27	148	46.3886	6
BF6-2	female	2019.09.14	139	46.3821	6
BF6-7	female	2019.11.8	193	45.8895	6
BF6-4	female	2019.09.27	195	45.2159	6
BF6-6	female	2019.11.20	194	45.0395	6
BF6-2	female	2019.09.14	140	44.8988	6
BF6-2	female	2019.09.14	138	44.8214	6
BF6-1	female	2019.09.12	148	44.7643	6
BF6-2	female	2019.09.14	139	44.7143	6
BF6-3	female	2019.09.27	152	42.0682	6
BF6-2	female	2019.09.14	143	40.7083	6
BF6-7	female	2019.11.8	190	38.2513	6
BF6-7	female	2019.11.8	180	31.4487	6
BF6-3	female	2019.09.27	153	22.0114	6
			158.468	39.9249
			21.9957	20.8256

## Sheet: Fig4A
	Male	Female
mean	203.868	158.468				t-test	5.60025e-30
SD	43.1101	21.9957				male	female
N	77	86	male:female	0.895349		198	195
						177	175
						206	161
	0.98773					119.7	158
						175	165
						178	158
						222.5	181
						121.2	179
						228	179
						356	157
						158	147
						224	167
						296	161
						168	165
						175	163
						173	165
						205	148
						214	170
						285	152
						305	149
						215	149
						186	148
						262	154
						205	162
						185	152
						256	178
						203	238
						194	147
						183	104.7
						195	149
						210	167
						205	148
						185	196
						186	140
						183	131
						208	154
						208	152
						215	166
						206	149
						109.5	169
						137	152
						192	154
						161	148
						172	165
						198	137
						175	110.8
						212	126
						201	142
						276	140
						154	169
						178	163
						160	151
						209	146
						238	145
						170	195
						272	146
						243	147
						212	173
						179	174
						161	139
						219	153
						208	130
						287	152
						172	148
						179	148
						235	139
						243	158
						193	164
						225	193
						153	195
						175	194
						161	140
						167	138
						186	148
						192	139
						298	145
						220	176
						315	193
						289	170
						179	170
						206	165
						182	135
						195	142
						296	152
						184	160
						302	167
						216	182
						155	176
						155	143
						165	178
						194	163
						184	179
						168	144
						185	154
						195	148
						212	156
						192	150
						196	190
						224	176
						207	166
						176	142
						288	154
						243	102.3
						299	172
						218	145
						171	177
						202	213
						281	177
						227	176
						202	165
						202	179
						174	194
						225	172
						252	163
						224	180
						205	150
						192	161
						201	140
						301	156
						211	156
						193	147
						192	159
						111.3	178
						217	179
						248	184
						282	109.7
						219	216
						182	183
						216	170
						196	162
						232	178
						205	144
						242	159
						196	194
						209	173
						251	158
						204	90.8
						218	141
						218	184
						219	112.4
						113.2	181
						174	149
						197	153
						206	153
						120.3	133
						127.3	129
						186	176
						162	160
						205	161
						162	170
						190	110.3
						162	158
						226	167
						187	161
						171	165
						198	154
						151	153
						155	183
						185	156
							166
							153
							161
							104.5
							133
							189
							179
							165
							113.2
							160
							179
							138
							169
							138
							144
							157
							101.5
							195
							132
							156
							107.3
							162
							180
							145
							170
							160
