# Supplementary material for: Uricase-deficient rat is generated with CRISPR/Cas9 technique
Source: PeerJ. 2020 Apr 27;8:e8971. doi: 10.7717/peerj.8971 (PMC7192158; doi:10.7717/peerj.8971)
Supplement: Supplemental Information 13 — Serum uric acid in male rats and female rats of wild-type. [file peerj-08-8971-s013.xls]

## Sheet: Fig 4B
SUA(gu/ml)
No.	1	2	3	4	5	6	7	8	9	10	mean	SD
male	5.724	9.01667	7.388	3.36733	9.024	11.0473	5.05467	6.71667	7.26333	5.48467	7.00867	2.2546
female	-	4.15	4.12	4.96667	5.19	1.54667	3.06733	2.60667	3.40667	5.70333	4.79147	1.33694
										male	female	T-test
									mean	7.00867	4.79147	0.00200763
									SD	2.2546	1.33694
