# Supplementary material for: Uricase-deficient rat is generated with CRISPR/Cas9 technique
Source: PeerJ. 2020 Apr 27;8:e8971. doi: 10.7717/peerj.8971 (PMC7192158; doi:10.7717/peerj.8971)
Supplement: Supplemental Information 14 — Serum uric acid in male rats and female rats of Uox-/-. Uox-/- rats included F2-F6 animals. [file peerj-08-8971-s014.xls]

## Sheet: male
name	sex	birth	body weight	SUA	generation
BF2-1	male	2018.10.9	119.7	96.1032	2
BF2-1	male	2018.10.9	121.2	85.0079	2
AF2-1	male	2018.12.16	173	74	2
AF2-1	male	2018.12.16	203	63.8	2
BF2-1	male	2018.12.16	194	63.1	2
BF2-1	male	2018.12.16	195	62.1	2
BF2-1	male	2018.12.16	206	57.6	2
AF2-1	male	2018.10.11	109.5	57.5032	2
BF2-1	male	2018.12.16	192	57.1	2
AF2-1	male	2018.12.16	198	56.3	2
BF2-1	male	2018.12.16	201	55.7	2
BF2-2	male	2018.11.18	178	54.31	2
BF2-2	male	2018.11.18	186	47.6654	2
AF2-1	male	2018.12.16	202	39.7	2
BF2-1	male	2018.10.9	111.3	36.8738	2
BF2-1	male	2018.12.16	209	32.4	2
BF2-1	male	2018.10.9	113.2	24.5365	2
BF2-1	male	2018.12.16	197	24.2	2
BF2-1	male	2018.12.16	206	22.2	2
BF2-1	male	2018.10.9	120.3	21.9429	2
BF2-1	male	2018.10.9	127.3	21.5675	2
AF2-1	male	2018.12.16	205	21.2	2
BF3-8	male	2019.3.10	198	121.11	3
BF3-8	male	2019.3.10	177	120.262	3
BF3-3	male	2019.1.3	206	97.3	3
BF3-8	male	2019.3.10	175	88.6429	3
AF3-4	male	2019.1.15	222.5	87.75	3
BF3-1	male	2019.1.13	228	81.7875	3
AF3-3	male	2019.1.2	214	70.5	3
BF3-6	male	2019.1.4	215	67.6	3
BF3-8	male	2019.3.10	183	62.831	3
BF3-6	male	2019.1.4	210	61.2	3
AF3-3	male	2019.1.2	205	61.1	3
BF3-8	male	2019.3.10	186	60.0357	3
BF3-6	male	2019.1.4	208	59.1	3
BF3-5	male	2019.1.1	238	53.6	3
BF3-5	male	2019.1.1	243	53.2	3
BF3-2	male	2019.1.5	179	52.5	3
BF3-4	male	2018.12.31	161	51.9	3
AF3-1	male	2019.1.4	219	51.6	3
BF3-3	male	2019.1.3	208	51.3	3
BF3-1	male	2019.1.13	235	50.2031	3
AF3-2	male	2018.12.31	225	48.3	3
BF3-3	male	2019.1.3	175	48.2	3
AF3-3	male	2019.1.2	220	47.2	3
BF3-4	male	2018.12.31	195	44.9	3
BF3-4	male	2018.12.31	216	44.2	3
AF3-3	male	2019.1.2	155	43.8	3
BF3-7	male	2019.3.6	194	42.9583	3
BF3-3	male	2019.1.3	212	42.6	3
BF3-7	male	2019.3.6	176	41.6667	3
BF3-5	male	2019.1.1	243	40.8	3
BF3-4	male	2018.12.31	202	40.5	3
BF3-6	male	2019.1.4	227	40.1	3
BF3-7	male	2019.3.6	202	40.0347	3
BF3-3	male	2019.1.3	225	39.6	3
AF3-4	male	2019.1.15	252	39.5	3
BF3-4	male	2018.12.31	224	39.5	3
BF3-3	male	2019.1.3	192	38.5	3
BF3-4	male	2018.12.31	193	37.3	3
AF3-4	male	2019.1.15	248	36.6389	3
BF3-6	male	2019.1.4	216	36.1	3
BF3-4	male	2018.12.31	182	36.1	3
AF3-2	male	2018.12.31	232	35	3
BF3-4	male	2018.12.31	242	33.4	3
BF3-1	male	2019.1.13	251	31.9375	3
BF3-6	male	2019.1.4	219	25.6	3
AF3-4	male	2019.1.15	226	15.7764	3
BF3-2	male	2019.1.5	198	15.2	3
AF4-2	male	2019.3.26	N/A	N/A	4
AF4-1	male	2019.3.28	154	54.8283	4
AF4-3	male	2019.3.21	192	42.5304	4
BF4-2	male	2019.3.29	207	41.9217	4
BF4-3	male	2019.3.21	186	21.5512	4
BF4-5	male	2019.3.21	162	21.295	4
BF4-5	male	2019.3.21	162	20.7263	4
BF4-3	male	2019.3.21	190	17.39	4
BF4-5	male	2019.3.21	162	16.6575	4
BF4-3	male	2019.3.21	187	15.6187	4
BF4-5	male	2019.3.21	171	15.3387	4
AF4-1	male	2019.3.28	151	14.8598	4
AF4-1	male	2019.3.28	155	14.3489	4
BF4-3	male	2019.3.21	185	14.3375	4
BF5-4	male	2019.08.01	178	88.4318	5
BF5-4	male	2019.08.01	356	79.1763	5
BF5-5	male	2019.09.22	158	77.631	5
BF5-5	male	2019.09.22	168	75.2214	5
BF5-4	male	2019.08.01	175	75.0227	5
BF5-4	male	2019.08.01	205	71.8636	5
BF5-4	male	2019.08.01	205	65.6316	5
BF5-4	male	2019.08.01	208	58.8421	5
BF5-6	male	2019.09.27	215	57.9886	5
BF5-2	male	2019.07.14	137	57.1943	5
BF5-5	male	2019.09.22	161	56.8333	5
BF5-2	male	2019.07.14	170	53.5057	5
BF5-6	male	2019.09.27	212	53.0659	5
BF5-2	male	2019.07.14	179	50.642	5
BF5-2	male	2019.07.14	153	48.2114	5
BF5-5	male	2019.09.22	161	47.869	5
BF5-2	male	2019.07.14	167	47.7898	5
BF5-2	male	2019.07.14	179	46.45	5
BF5-1	male	2019.06.23	182	45.7131	5
BF5-1	male	2019.06.23	184	44.5095	5
BF5-2	male	2019.07.14	155	44.1648	5
BF5-2	male	2019.07.14	165	43.6534	5
BF5-1	male	2019.06.23	184	42.8262	5
BF5-5	male	2019.09.22	168	42.769	5
BF5-1	male	2019.06.23	196	42.4833	5
BF5-3	male	2019.07.15	224	42.2602	5
BF5-6	male	2019.09.27	218	40.6932	5
BF5-3	male	2019.07.15	201	38.4023	5
BF5-3	male	2019.07.15	211	37.7398	5
BF5-6	male	2019.09.27	217	36.7136	5
BF5-6	male	2019.09.27	219	36.4432	5
BF5-3	male	2019.07.15	205	34.8682	5
BF5-3	male	2019.07.15	204	30.4102	5
BF5-3	male	2019.07.15	218	28.1193	5
BF5-6	male	2019.09.27	218	26.5659	5
BF5-1	male	2019.06.23	174	24.5286	5
BF6-4	male	2019.09.27	224	76.8977	6
BF6-7	male	2019.11.8	296	75.2776	6
BF6-7	male	2019.11.8	285	68.8934	6
BF6-6	male	2019.11.20	305	68.3947	6
BF6-1	male	2019.09.12	186	66.725	6
BF6-5	male	2019.10.17	262	66.4868	6
BF6-1	male	2019.09.12	185	64.7321	6
BF6-5	male	2019.10.17	256	63.8015	6
BF6-1	male	2019.09.12	185	60.4774	6
BF6-3	male	2019.09.27	183	59.6795	6
BF6-2	male	2019.09.14	172	56.3393	6
BF6-3	male	2019.09.27	175	56.2273	6
BF6-4	male	2019.09.27	212	56.0364	6
BF6-6	male	2019.11.20	276	54.8947	6
BF6-1	male	2019.09.12	160	53.8571	6
BF6-3	male	2019.09.27	209	53.6909	6
BF6-7	male	2019.11.8	272	53.2158	6
BF6-6	male	2019.11.20	287	51.2224	6
BF6-2	male	2019.09.14	172	51.2214	6
BF6-5	male	2019.10.17	243	49.4912	6
BF6-3	male	2019.09.27	193	49.3636	6
BF6-1	male	2019.09.12	192	47.6619	6
BF6-7	male	2019.11.8	298	47.2184	6
BF6-7	male	2019.11.8	315	47.0329	6
BF6-6	male	2019.11.20	289	46.8961	6
BF6-3	male	2019.09.27	206	46.2227	6
BF6-6	male	2019.11.20	296	44.5276	6
BF6-6	male	2019.11.20	302	44.2987	6
BF6-3	male	2019.09.27	185	42.7182	6
BF6-2	male	2019.09.14	195	42.6214	6
BF6-7	male	2019.11.8	288	41.35	6
BF6-7	male	2019.11.8	299	40.7908	6
BF6-1	male	2019.09.12	171	40.5071	6
BF6-7	male	2019.11.8	281	40.4474	6
BF6-2	male	2019.09.14	174	39.6083	6
BF6-3	male	2019.09.27	205	39.4432	6
BF6-7	male	2019.11.8	301	38.3224	6
BF6-3	male	2019.09.27	192	37.2955	6
BF6-6	male	2019.11.20	282	36.5408	6
BF6-3	male	2019.09.27	196	35.1591	6
BF6-3	male	2019.09.27	196	33.0341	6
			203.868	48.4158
			43.1101	19.066

## Sheet: Female
name	sex	birth	body weight	SUA	generation
AF2-1	female	2018.12.16	158	93	2
BF2-1	female	2018.12.16	161	76	2
BF2-1	female	2018.12.16	154	66.3	2
AF2-1	female	2018.10.11	104.7	59.5032	2
AF2-1	female	2018.10.11	110.8	51.1051	2
BF2-2	female	2018.11.18	160	41.75	2
BF2-1	female	2018.10.9	102.3	35.4421	2
AF2-1	female	2018.12.16	140	30.4	2
BF2-1	female	2018.10.9	109.7	27.9135	2
AF2-1	female	2018.12.16	162	26.6	2
AF2-1	female	2018.10.11	90.8	24.2596	2
BF2-1	female	2018.10.9	112.4	22.3595	2
BF2-1	female	2018.12.16	149	22.1	2
AF2-1	female	2018.12.16	153	21.7	2
AF2-1	female	2018.12.16	176	20.7	2
AF2-1	female	2018.12.16	160	20.3	2
AF2-1	female	2018.12.16	161	20.2	2
BF2-1	female	2018.10.9	110.3	19.1397	2
BF2-1	female	2018.12.16	167	18.7	2
BF2-1	female	2018.12.16	154	17.8	2
BF2-1	female	2018.12.16	156	16.8	2
BF2-1	female	2018.12.16	166	16.3	2
BF2-1	female	2018.10.9	104.5	15.3452	2
BF2-1	female	2018.10.9	113.2	14.2937	2
AF2-1	female	2018.10.11	101.5	12.125	2
AF2-1	female	2018.10.11	107.3	11.0109	2
BF3-1	female	2019.1.13	195	died	3
AF3-2	female	2018.12.31	175	125	3
AF3-2	female	2018.12.31	161	115	3
BF3-3	female	2019.1.3	165	84.1	3
BF3-3	female	2019.1.3	181	81.7	3
AF3-3	female	2019.1.2	158	81.7	3
BF3-3	female	2019.1.3	179	79.5	3
AF3-3	female	2019.1.2	165	74.2	3
AF3-3	female	2019.1.2	163	73.9	3
BF3-3	female	2019.1.3	165	72.2	3
BF3-6	female	2019.1.4	170	72	3
BF3-2	female	2019.1.5	152	69.3	3
BF3-2	female	2019.1.5	148	66.4	3
AF3-1	female	2019.1.4	162	65.9	3
BF3-2	female	2019.1.5	149	57.8	3
BF3-2	female	2019.1.5	140	54.7	3
BF3-8	female	2019.3.10	154	53.8215	3
BF3-2	female	2019.1.5	152	52.2	3
AF3-1	female	2019.1.4	148	51.6	3
BF3-6	female	2019.1.4	165	51.5	3
BF3-8	female	2019.3.10	169	50.766	3
BF3-7	female	2019.3.6	163	50.6264	3
BF3-2	female	2019.1.5	146	50.2	3
BF3-7	female	2019.3.6	195	49.5889	3
BF3-7	female	2019.3.6	147	49.3722	3
BF3-2	female	2019.1.5	152	46.8	3
BF3-2	female	2019.1.5	158	46	3
BF3-5	female	2019.1.1	176	44.3	3
BF3-3	female	2019.1.3	170	43.6	3
AF3-4	female	2019.1.15	165	43.25	3
AF3-2	female	2018.12.31	182	41.4	3
BF3-6	female	2019.1.4	176	41.3	3
AF3-2	female	2018.12.31	178	40.4	3
AF3-4	female	2019.1.15	179	39.8819	3
BF3-3	female	2019.1.3	176	38.2	3
BF3-4	female	2018.12.31	172	34.8	3
BF3-7	female	2019.3.6	213	34.2639	3
BF3-6	female	2019.1.4	165	32.8	3
AF3-2	female	2018.12.31	194	31.9	3
BF3-3	female	2019.1.3	163	31.8	3
AF3-3	female	2019.1.2	156	29.7	3
BF3-4	female	2018.12.31	178	28.4	3
BF3-5	female	2019.1.1	184	28.2	3
BF3-4	female	2018.12.31	216	27.9	3
BF3-5	female	2019.1.1	183	27.9	3
BF3-4	female	2018.12.31	194	25.5	3
BF3-2	female	2019.1.5	159	25.5	3
BF3-4	female	2018.12.31	173	25.3	3
AF3-1	female	2019.1.4	184	22.6	3
BF3-6	female	2019.1.4	181	22.2	3
AF3-1	female	2019.1.4	170	20.2	3
AF3-4	female	2019.1.15	161	15.5278	3
AF3-4	female	2019.1.15	179	14.4986	3
BF3-6	female	2019.1.4	179	13.6	3
BF3-2	female	2019.1.5	156	11.5	3
BF3-2	female	2019.1.5	162	10.9	3
AF3-4	female	2019.1.15	180	10.6722	3
AF3-4	female	2019.1.15	160	9.10278	3
AF4-1	female	2019.3.28	174	48.6424	4
BF4-5	female	2019.3.21	139	48.4637	4
BF4-2	female	2019.3.29	153	47.4239	4
BF4-3	female	2019.3.21	145	44.68	4
AF4-1	female	2019.3.28	170	44.0261	4
BF4-3	female	2019.3.21	135	43.1812	4
BF4-3	female	2019.3.21	154	39.39	4
BF4-4	female	2019.3.21	150	38.6	4
BF4-3	female	2019.3.21	142	37.3137	4
BF4-2	female	2019.3.29	154	36.3587	4
BF4-2	female	2019.3.29	145	34.6304	4
BF4-3	female	2019.3.21	141	22.8675	4
BF4-5	female	2019.3.21	133	21.2862	4
BF4-5	female	2019.3.21	129	20.7662	4
BF4-3	female	2019.3.21	158	18.79	4
BF4-2	female	2019.3.29	161	18.6543	4
BF4-2	female	2019.3.29	165	18.087	4
BF4-2	female	2019.3.29	153	17.4	4
BF4-2	female	2019.3.29	183	17.3913	4
BF4-3	female	2019.3.21	153	16.2937	4
BF4-5	female	2019.3.21	133	15.1313	4
AF4-1	female	2019.3.28	189	14.7337	4
BF4-2	female	2019.3.29	165	14.3804	4
BF4-2	female	2019.3.29	160	14.1413	4
BF4-5	female	2019.3.21	138	13.4913	4
BF4-2	female	2019.3.29	169	13.1109	4
BF4-5	female	2019.3.21	138	12.9187	4
BF4-5	female	2019.3.21	144	12.425	4
BF4-2	female	2019.3.29	157	12.3913	4
AF4-1	female	2019.3.28	195	11.6478	4
AF4-2	female	2019.3.26	132	11.5775	4
BF4-5	female	2019.3.21	145	10.175	4
BF4-2	female	2019.3.29	170	9.25	4
BF5-4	female	2019.08.01	238	61.7632	5
BF5-4	female	2019.08.01	167	56.5789	5
BF5-2	female	2019.07.14	152	53.2614	5
BF5-4	female	2019.08.01	169	52.2368	5
BF5-1	female	2019.06.23	154	51.7738	5
BF5-2	female	2019.07.14	137	51.4227	5
BF5-2	female	2019.07.14	126	51.0614	5
BF5-2	female	2019.07.14	145	49.9682	5
BF5-5	female	2019.09.22	146	49.4405	5
BF5-6	female	2019.09.27	173	49.1023	5
BF5-1	female	2019.06.23	164	45.9595	5
BF5-1	female	2019.06.23	193	44.2024	5
BF5-5	female	2019.09.22	142	42.875	5
BF5-6	female	2019.09.27	167	41.5659	5
BF5-6	female	2019.09.27	163	39.9977	5
BF5-2	female	2019.07.14	144	39.7955	5
BF5-2	female	2019.07.14	148	38.8477	5
BF5-1	female	2019.06.23	156	38.7619	5
BF5-3	female	2019.07.15	166	37.4784	5
BF5-3	female	2019.07.15	177	34.267	5
BF5-6	female	2019.09.27	177	32.9795	5
BF5-6	female	2019.09.27	176	32.9091	5
BF5-6	female	2019.09.27	179	32.4205	5
BF5-6	female	2019.09.27	172	31.8523	5
BF5-6	female	2019.09.27	150	31.2182	5
BF5-6	female	2019.09.27	161	31.0659	5
BF5-3	female	2019.07.15	156	30.0443	5
BF5-2	female	2019.07.14	147	29.0841	5
BF5-3	female	2019.07.15	159	28.9045	5
BF5-3	female	2019.07.15	179	28.2739	5
BF5-3	female	2019.07.15	170	27.342	5
BF5-3	female	2019.07.15	178	26.3443	5
BF5-5	female	2019.09.22	144	25.5881	5
BF5-3	female	2019.07.15	158	24.8091	5
BF6-4	female	2019.09.27	179	79.2977	6
BF6-5	female	2019.10.17	157	79.0441	6
BF6-5	female	2019.10.17	147	79.0294	6
BF6-4	female	2019.09.27	167	76.9864	6
BF6-1	female	2019.09.12	148	72.1774	6
BF6-1	female	2019.09.12	149	68.9179	6
BF6-1	female	2019.09.12	149	67.775	6
BF6-2	female	2019.09.14	152	63.0119	6
BF6-5	female	2019.10.17	178	62.9485	6
BF6-2	female	2019.09.14	147	60.3452	6
BF6-2	female	2019.09.14	148	56.3381	6
BF6-7	female	2019.11.8	196	55.5408	6
BF6-1	female	2019.09.12	131	54.1369	6
BF6-5	female	2019.10.17	166	52.5971	6
BF6-2	female	2019.09.14	149	52.381	6
BF6-1	female	2019.09.12	142	50.9119	6
BF6-2	female	2019.09.14	140	50.781	6
BF6-2	female	2019.09.14	151	50.5714	6
BF6-3	female	2019.09.27	130	47.1568	6
BF6-1	female	2019.09.12	148	46.7024	6
BF6-3	female	2019.09.27	148	46.3886	6
BF6-2	female	2019.09.14	139	46.3821	6
BF6-7	female	2019.11.8	193	45.8895	6
BF6-4	female	2019.09.27	195	45.2159	6
BF6-6	female	2019.11.20	194	45.0395	6
BF6-2	female	2019.09.14	140	44.8988	6
BF6-2	female	2019.09.14	138	44.8214	6
BF6-1	female	2019.09.12	148	44.7643	6
BF6-2	female	2019.09.14	139	44.7143	6
BF6-3	female	2019.09.27	152	42.0682	6
BF6-2	female	2019.09.14	143	40.7083	6
BF6-7	female	2019.11.8	190	38.2513	6
BF6-7	female	2019.11.8	180	31.4487	6
BF6-3	female	2019.09.27	153	22.0114	6
			158.468	39.9249
			21.9957	20.8256

## Sheet: Fig4C
	Male	Female
mean	48.4158	39.9249
SD	19.066	20.8256			T-test	0.000109156
N	160	185	male:female	0.864865
					male	female
			survival	0.994203	96.1032	93
					85.0079	76
					74	66.3
					63.8	59.5032
					63.1	51.1051
					62.1	41.75
					57.6	35.4421
					57.5032	30.4
					57.1	27.9135
					56.3	26.6
					55.7	24.2596
					54.31	22.3595
					47.6654	22.1
					39.7	21.7
					36.8738	20.7
					32.4	20.3
					24.5365	20.2
					24.2	19.1397
					22.2	18.7
					21.9429	17.8
					21.5675	16.8
					21.2	16.3
					121.11	15.3452
					120.262	14.2937
					97.3	12.125
					88.6429	11.0109
					87.75	died
					81.7875	125
					70.5	115
					67.6	84.1
					62.831	81.7
					61.2	81.7
					61.1	79.5
					60.0357	74.2
					59.1	73.9
					53.6	72.2
					53.2	72
					52.5	69.3
					51.9	66.4
					51.6	65.9
					51.3	57.8
					50.2031	54.7
					48.3	53.8215
					48.2	52.2
					47.2	51.6
					44.9	51.5
					44.2	50.766
					43.8	50.6264
					42.9583	50.2
					42.6	49.5889
					41.6667	49.3722
					40.8	46.8
					40.5	46
					40.1	44.3
					40.0347	43.6
					39.6	43.25
					39.5	41.4
					39.5	41.3
					38.5	40.4
					37.3	39.8819
					36.6389	38.2
					36.1	34.8
					36.1	34.2639
					35	32.8
					33.4	31.9
					31.9375	31.8
					25.6	29.7
					15.7764	28.4
					15.2	28.2
					N/A	27.9
					54.8283	27.9
					42.5304	25.5
					41.9217	25.5
					21.5512	25.3
					21.295	22.6
					20.7263	22.2
					17.39	20.2
					16.6575	15.5278
					15.6187	14.4986
					15.3387	13.6
					14.8598	11.5
					14.3489	10.9
					14.3375	10.6722
					88.4318	9.10278
					79.1763	48.6424
					77.631	48.4637
					75.2214	47.4239
					75.0227	44.68
					71.8636	44.0261
					65.6316	43.1812
					58.8421	39.39
					57.9886	38.6
					57.1943	37.3137
					56.8333	36.3587
					53.5057	34.6304
					53.0659	22.8675
					50.642	21.2862
					48.2114	20.7662
					47.869	18.79
					47.7898	18.6543
					46.45	18.087
					45.7131	17.4
					44.5095	17.3913
					44.1648	16.2937
					43.6534	15.1313
					42.8262	14.7337
					42.769	14.3804
					42.4833	14.1413
					42.2602	13.4913
					40.6932	13.1109
					38.4023	12.9187
					37.7398	12.425
					36.7136	12.3913
					36.4432	11.6478
					34.8682	11.5775
					30.4102	10.175
					28.1193	9.25
					26.5659	61.7632
					24.5286	56.5789
					76.8977	53.2614
					75.2776	52.2368
					68.8934	51.7738
					68.3947	51.4227
					66.725	51.0614
					66.4868	49.9682
					64.7321	49.4405
					63.8015	49.1023
					60.4774	45.9595
					59.6795	44.2024
					56.3393	42.875
					56.2273	41.5659
					56.0364	39.9977
					54.8947	39.7955
					53.8571	38.8477
					53.6909	38.7619
					53.2158	37.4784
					51.2224	34.267
					51.2214	32.9795
					49.4912	32.9091
					49.3636	32.4205
					47.6619	31.8523
					47.2184	31.2182
					47.0329	31.0659
					46.8961	30.0443
					46.2227	29.0841
					44.5276	28.9045
					44.2987	28.2739
					42.7182	27.342
					42.6214	26.3443
					41.35	25.5881
					40.7908	24.8091
					40.5071	79.2977
					40.4474	79.0441
					39.6083	79.0294
					39.4432	76.9864
					38.3224	72.1774
					37.2955	68.9179
					36.5408	67.775
					35.1591	63.0119
					33.0341	62.9485
						60.3452
						56.3381
						55.5408
						54.1369
						52.5971
						52.381
						50.9119
						50.781
						50.5714
						47.1568
						46.7024
						46.3886
						46.3821
						45.8895
						45.2159
						45.0395
						44.8988
						44.8214
						44.7643
						44.7143
						42.0682
						40.7083
						38.2513
						31.4487
						22.0114
