# Supplementary material for: Uricase-deficient rat is generated with CRISPR/Cas9 technique
Source: PeerJ. 2020 Apr 27;8:e8971. doi: 10.7717/peerj.8971 (PMC7192158; doi:10.7717/peerj.8971)
Supplement: Supplemental Information 15 — Serum lipids in male rats of wild-type and Uox-/-. [file peerj-08-8971-s015.xls]

## Sheet: Sheet3
deficiency	TG mmol/L	TC mmol/L	HDL mmol/L	LDL mmol/L			wild type	TG mmol/L	TC mmol/L	HDL mmol/L	LDL mmol/L
male 1	0.1345	4.8741	1.5376	2.0672			male 1	0.5568	1.9146	1.0574	1.5164
male 2	0.2476	4.3304	1.3947	1.2501			male 2	0.3666	1.5373	0.8435	1.8039
male 3	0.1832	1.5964	1.1941	1.187			male 3	0.355	2.8142	0.9817	2.5745
male 4	0.3246	2.5654	1.1418	1.0157			male 4	0.4591	2.1006	1.4354	0.8713
male 5	0.1489	2.4125	1.0317	1.0633			male 5	0.2038	2.9077	0.9169	1.9154
male 6	0.4341	3.3788	1.4163	0.8068			male 6	0.4599	2.9372	0.9787	2.174
male 7	0.7383	2.7231	1.2302	0.8493			male 7	0.3972	2.4579	1.1718	2.0398
male 8	0.278	2.1514	1.0171	1.0135			female 1	0.549	2.3635	1.2782	1.5777
male 9	0.1499	2.6238	1.0414	0.9222			female 2	0.2052	2.9598	1.1254	2.0877
male 10	0.0942	2.9565	1.2736	0.905			female 3	0.588	2.0256	1.3194	1.5806
female 1	0.132	2.5146	0.9571	1.7394			female 4	0.4242	1.6873	1.6194	1.1682
female 2	0.2211	3.151	2.1261	1.9496			female 5	0.3764	2.0526	0.8189	1.9589
female 3	0.1542	4.9105	1.8102	2.1924			mean	0.411767	2.31319	1.12889	1.77237
female 4	0.1486	4.4084	1.4045	1.6729			SD	0.123687	0.503067	0.246208	0.462115
female 5	0.1863	1.7225	1.396	0.5934
female 6	0.1628	2.5098	1.2624	1.1964
female 7	0.3991	1.8939	0.9835	0.7971			t-test	0.00153328	0.187471	0.0904573	0.00168538
female 8	0.1736	1.7866	0.9752	0.6888
female 9	0.2282	1.8595	1.3621	0.6636
female 10	0.0445	1.078	1.6487	0.7237
mean								TG	TC	HDL	LDL
male	0.27333	2.96124	1.22785	1.10801			wild-type	0.411767	2.31319	1.12889	1.77237
female	0.18504	2.58348	1.39258	1.22173			Uox-/-	0.229185	2.77236	1.31022	1.16487
SD
male	0.193092	0.991913	0.178759	0.365045			SD	0.123687	0.503067	0.246208	0.462115
female	0.0909552	1.23469	0.384026	0.611268			SD	0.153724	1.10712	0.303537	0.493474
T-test	0.207307	0.460446	0.234615	0.619621
total	0.229185	2.77236	1.31022	1.16487
SD	0.153724	1.10712	0.303537	0.493474
