# Supplementary material for: Uricase-deficient rat is generated with CRISPR/Cas9 technique
Source: PeerJ. 2020 Apr 27;8:e8971. doi: 10.7717/peerj.8971 (PMC7192158; doi:10.7717/peerj.8971)
Supplement: Supplemental Information 16 — Left kidney index for wild-type male rats and Uox-/- male rats. [file peerj-08-8971-s016.xlsx]

## Sheet: Sheet1
Uox-/-			kidney weight (g)		kidney index		experiment day
		body weight（g)	left	right	left	right
1		356	1.3387	1.3379	0.00376039	0.00375815	2019.11.7
2		378	1.4844		0.00392698		2019.11.7
3		337	1.4433		0.00428279		2019.11.7
4		209	1.1452	1.1305	0.00547943	0.00540909	2019.09.04
5		180	0.9566	0.931	0.00531444	0.00517222	2019.09.04
6		220	1.0792	1.0336	0.00490545	0.00469818	2019.09.10
7		186	1.0048	0.999	0.00540215	0.00537097	2019.09.10
8		208	1.0425	1.0843	0.00501202	0.00521298	2019.09.10
9		180	1.0403		0.00577944		2019.09.24
10		205	1.0911	1.0205	0.00532244	0.00497805	2019.09.24
11		180	1.2023	1.0175	0.00667944	0.00565278	2019.09.24
					average	SD
					0.00505881	0.000711119
		body weight(g)	lef kidney (g)
1		217	0.7831		0.00360876
2		220	0.7315		0.003325
3		215	0.8036		0.00373767
4		221	0.8313		0.00376154
5		222	0.7676		0.00345766
6		219	0.8711		0.00397763
7		220	0.8359		0.00379955
	wild type	Uox-/-		U-/- 300mg xanthine
1	0.00360876	0.00376039		0.0036201
2	0.003325	0.00392698		0.0054807
3	0.00373767	0.00428279		0.0065038
4	0.00376154	0.00547943		0.0049584
5	0.00345766	0.00531444		0.0055601
6	0.00397763	0.00490545		0.0056076
7	0.00379955	0.00540215		0.0085179
8		0.00501202		0.0056657
9		0.00577944		0.0040194
10		0.00532244
11		0.00667944
	wild type	Uox-/-
mean	0.00366683	0.00507864	0.000577813	0.0499337	0.370875
SD	0.000220669	0.000846518		0.00142113
