# Supplementary material for: Uricase-deficient rat is generated with CRISPR/Cas9 technique
Source: PeerJ. 2020 Apr 27;8:e8971. doi: 10.7717/peerj.8971 (PMC7192158; doi:10.7717/peerj.8971)
Supplement: Supplemental Information 17 [file peerj-08-8971-s017.xls]

## Sheet: Fig 5B BUN
	Wild type	Uox-/-
1	4.02	5.11569
2	4.03	8.71765
3	4.44	7.75686
4	4.03	7.96667
5	2.81	4.9902
6		7.34314
7		8.50392
8		7.66379
9		8.36752
10		8.47921
	Wild type	Uox-/-
mean	3.866	7.19916
SD	0.616871	1.73252
	t-test	8.38124e-05

## Sheet: Fig 5C Cr
	Wild type	Uox-/-
1	54.06	24.5
2	62.47	37
3	48.24	29.5
4	47.6	18.5
5	45.01	12.5
6		19.6667
7		21.1667
8		18.6667
9		18.6667
10		20.8333
11		20.3333
	Wild type	Uox-/-
mean	51.476	21.9394
SD	6.97942	6.49969
	T-test	9.59547e-07

## Sheet: BUN_Cr
	Wild type	Uox-/-			Wild type	Uox-/-			Wild type	Uox-/-
1	4.02	5.11569		1	54.06	24.5		1	74.3618	208.804
2	4.03	8.71765		2	62.47	37		2	64.511	235.612
3	4.44	7.75686		3	48.24	29.5		3	92.0398	262.944
4	4.03	7.96667		4	47.6	18.5		4	84.6639	430.631
5	2.81	4.9902		5	45.01	12.5		5	62.4306	399.216
6		7.34314		6		19.6667		6		373.38
7		8.50392		7		21.1667		7		401.76
8		7.66379		8		18.6667		8		410.56
9		8.36752		9		18.6667		9		448.26
10		8.47921		10		20.8333		10		407.002
	Wild type	Uox-/-			Wild type	Uox-/-			Wild type	Uox-/-
mean	3.866	7.19916		mean	51.476	22.1		mean	75.6014	357.817
SD	0.616871	1.73252		SD	6.97942	6.82823		SD	12.751	87.3751
	t-test	8.38124e-05			T-test	2.94288e-06			T-test	8.61889e-06
