# Supplementary material for: Uricase-deficient rat is generated with CRISPR/Cas9 technique
Source: PeerJ. 2020 Apr 27;8:e8971. doi: 10.7717/peerj.8971 (PMC7192158; doi:10.7717/peerj.8971)
Supplement: Supplemental Information 18 [file peerj-08-8971-s018.xls]

## Sheet: Sheet1
	wild-type	Uox-/-	ug/g
	54.97	1480.66
	44.48	544.042
	285.33	378.583
	139.63	266.75
	66.28	329.577
	89.22	387.962
	62.91	191.529
	42.83	415.088
		462
mean	98.2062	511.3
SD	81.8531	383.727
T-test	0.0119568
